# Supplementary material for: Haphazard reporting of deaths in clinical trials: a review of cases of ClinicalTrials.gov records and matched publications–a cross-sectional study
Source: PubMed Central journal article supplement — BMJ Open. 2013 Jan 18;3(1):e001963. doi: 10.1136/bmjopen-2012-001963 (PMC3549200; doi:10.1136/bmjopen-2012-001963), 2013-01-18
Supplement: bmjopen-2012-001963.draft_revisions.pdf [file bmjopen-2012-001963.draft_revisions.pdf]

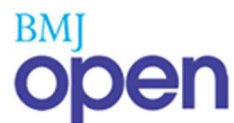

**Haphazard Reporting of Deaths in Clinical Trials – a Review  
of Cases of ClinicalTrials.gov Records and Matched  
Publications: cross-sectional study**

|                                 |                                                                                                                                                                                            |
|---------------------------------|--------------------------------------------------------------------------------------------------------------------------------------------------------------------------------------------|
| Journal:                        | <i>BMJ Open</i>                                                                                                                                                                            |
| Manuscript ID:                  | bmjopen-2012-001963                                                                                                                                                                        |
| Article Type:                   | Research                                                                                                                                                                                   |
| Date Submitted by the Author:   | 15-Aug-2012                                                                                                                                                                                |
| Complete List of Authors:       | Earley, Amy; Tufts Medical Center, Tufts Evidence-based Practice Center<br>Lau, Joseph; Tufts Medical Center, Tufts Evidence-based Practice Center<br>Uhlig, Katrin; Tufts Medical Center, |
| <b>Primary Subject Heading</b>: | Medical publishing and peer review                                                                                                                                                         |
| Secondary Subject Heading:      | Evidence based practice                                                                                                                                                                    |
| Keywords:                       | EPIDEMIOLOGY, PUBLIC HEALTH, STATISTICS & RESEARCH METHODS,<br>QUALITATIVE RESEARCH                                                                                                        |
|                                 |                                                                                                                                                                                            |

SCHOLARONE™  
Manuscripts

1  
2  
3 **Haphazard Reporting of Deaths in Clinical Trials – a Review of Cases of ClinicalTrials.gov**  
4  
5 **Records and Matched Publications: cross-sectional study**  
6  
7

8  
9  
10 Amy Earley BS research associate<sup>1</sup>, Joseph Lau MD professor of medicine<sup>1,2</sup>, Katrin  
11  
12 Uhlig MD MS associate professor of medicine<sup>1,2,3</sup>  
13

14  
15  
16 Author affiliations:  
17

18 <sup>1</sup> Tufts Evidence-based Practice Center, Tufts Medical Center, Boston, MA 02111, US  
19

20 <sup>2</sup> Tufts University School of Medicine, Boston, MA 02111, USA  
21

22 <sup>3</sup> Division of Nephrology, Department of Medicine, Tufts Medical Center, Boston, MA  
23  
24 02111, USA  
25

26  
27  
28 Corresponding author:  
29

30 Katrin Uhlig MD, MS  
31

32 Tufts Medical Center  
33

34 800 Washington Street, #391  
35

36 Boston, Massachusetts, 02111, USA  
37

38 Email: kuhlig@tuftsmedicalcenter.org  
39  
40  
41  
42  
43  
44  
45

46 Word Count:  
47

48 Abstract: 261  
49

50 Manuscript Text: 2796  
51  
52  
53  
54  
55  
56  
57  
58  
59  
60

## Abstract

**Context:** A participant death is a serious event in a clinical trial and needs to be unambiguously and publicly reported.

**Objective:** To examine: 1) how often and how death counts are reported in ClinicalTrials.gov records; 2) how often total deaths can be determined per arm within a ClinicalTrials.gov results record and its corresponding publication; 3) how counts may be discordant.

**Design:** Registry-based study of clinical trial results reporting

**Setting:** ClinicalTrials.gov results database searched in July 2011 and matched PubMed publications

**Selection criteria:** A random sample of ClinicalTrials.gov results records. Detailed review of records with a single corresponding publication.

**Main outcome measure:** ClinicalTrials.gov records reporting a death count under participant flow, primary or secondary outcome, or serious adverse events. Consistency in reporting of death counts between ClinicalTrials.gov records and corresponding publications.

**Results:** In 500 randomly selected ClinicalTrials.gov records, 123 records (25%) reported some death count. Reporting of deaths across data modules for participant flow, primary or secondary outcomes, and serious adverse events was variable. In a sample of pairs of ClinicalTrials.gov records with death counts and corresponding publications, total deaths per arm could be determined in 56% (15/27 pairs) but were discordant in 19% (5/27). In pairs of ClinicalTrials.gov

1  
2  
3 records without information on death, 48% (13/27) were discordant since the publications  
4  
5 reported absence of deaths in 33% (9/27) and actual deaths in 15% (4/27).  
6  
7  
8

9  
10 **Conclusions:** Death counts are variably reported in clinical trials and a reliable total death  
11  
12 count per arm cannot always be determined. This highlights a need for unambiguous and  
13  
14 complete reporting of death counts in trial registries and publications.  
15  
16  
17  
18  
19  
20  
21  
22  
23  
24  
25  
26  
27  
28  
29  
30  
31  
32  
33  
34  
35  
36  
37  
38  
39  
40  
41  
42  
43  
44  
45  
46  
47  
48  
49  
50  
51  
52  
53  
54  
55  
56  
57  
58  
59  
60

## Article Summary

### Article focus

- We hypothesized that the discrepant reporting expectations for death give rise to discrepancies in deaths reported across reports of a trial.

### Key messages

- There is a lack of clarity, consistency and agreement in reporting of all cause death counts in clinical trials which highlights the need for unambiguous templates to standardize reporting of total death counts per arm in ClinicalTrials.gov records and more stringent reporting guidelines for peer reviewed publications.

### Strengths and limitations of this study

- Our findings indicate a need for clarifying expectations in reporting and highlight differences in the legal standards for reporting of serious adverse events after trial completion and expeditious real time reporting of serious adverse events in ongoing trials.
- We suggest amendments to reporting formats such as: number of individuals who started per arm, number of deaths from any cause per arm and the time point of last ascertainment to prompt study investigators to sum up all deaths across participant loss, primary or secondary outcomes, and serious adverse events.
- We examined only a limited number of matched cases. Nevertheless, the discrepant findings even in these small samples demonstrate a clear disconnect between reporting expectations and reporting practices as illustrated by inconsistencies across reports of the same trial.

- 1  
2  
3  
4  
5  
6  
7  
8  
9  
10  
11  
12  
13  
14  
15  
16  
17  
18  
19  
20  
21  
22  
23  
24  
25  
26  
27  
28  
29  
30  
31  
32  
33  
34  
35  
36  
37  
38  
39  
40  
41  
42  
43  
44  
45  
46  
47  
48  
49  
50  
51  
52  
53  
54  
55  
56  
57  
58  
59  
60
- We used only data available in these reports to determine the total number of deaths per arm. It is possible that individual patient data available to the trial investigators would allow more studies to provide unambiguous death counts. However, this information is not publicly available and clinicians and policy makers rely on publicly accessible trial results reported in ClinicalTrials.gov records and in journal publications.
  - We only gave credit to death counts and not to alternate information on death, such as percents or survival analyses, as exact back calculations are not always possible.
  - We followed operational rules to determine total deaths per arm within a report. These operational rules were not overly stringent and more rigid expectations would have resulted in fewer reports with the data amenable for detailed analysis.

## Introduction

The death of a clinical trial subject is a serious event that needs to be publicly disclosed. Inadequate reporting of deaths may overemphasize health benefits when benefits and harms of medical interventions are summarized<sup>1,2</sup>. For unambiguous reporting, deaths have to be reported for each trial arm and the absence of deaths must be explicitly stated if none were known to have occurred. Trial registries such as ClinicalTrials.gov provide public records of trial results.<sup>3</sup> It is a Web-based trial registration of federally and privately funded trials.

While there is no regulation specifically mandating the reporting of all deaths from any cause in a clinical trial, a death may constitute a serious adverse event and is therefore subject to the regulations on reporting of serious adverse events. However, it appears that there is incongruence between legal reporting expectations for serious adverse events after trial completion versus during trial conduct. The United States Food and Drug Administration (FDA) Amendments Act mandates the reporting of summary results for phase II-IV interventional studies of drugs, biological products, and devices within 1 year of completing data collection for the prespecified primary outcome in ClinicalTrials.gov<sup>3-5</sup>. The Act includes a provision regarding the reporting of aggregate serious adverse events, thus mandating public disclosure. Based on this Act, the results data bank of the ClinicalTrials.gov registry shall include “a table of anticipated and unanticipated serious adverse events grouped by organ system with number and frequency in each arms of the trial”<sup>6</sup>. The ClinicalTrials.gov data element definitions define adverse events as “unfavorable changes in health ..., that occur in trial participants during the clinical trial or within a specified period following the trial.” and under serious adverse events include ‘adverse events that result in death’<sup>7</sup>.

In contrast to these reporting expectations of all deaths after trial completion, investigators and sponsors of ongoing clinical trials have to report adverse events to respective

1  
2  
3 drug regulatory authorities. The FDA regulation on drug safety reporting requires sponsors of  
4 investigational new drugs to promptly report to the FDA and investigators serious unexpected  
5 events if they are suspected adverse reactions, meaning that there is a “reasonable possibility”  
6 that the drug caused it<sup>8,9</sup>. Otherwise, adverse events are batched by the sponsor and submitted  
7 later. This requires an adjudication of the event as serious or minor; expected or unexpected;  
8 and study-related, possibly study-related, or not study-related. Death is by definition a serious  
9 event, but it is nonspecific as it may result from natural disease progression, lack of efficacy of  
10 an intervention, harm from an intervention or a cause unrelated to a trial. This need for judgment  
11 about the possibility of a causal association makes accounting and adjudication of deaths in  
12 trials challenging<sup>10</sup>.  
13  
14  
15  
16  
17  
18  
19  
20  
21  
22  
23  
24  
25  
26

27 We hypothesized that the discrepant reporting expectations for death give rise to  
28 discrepancies in deaths reported across reports of a trial. We first examined how death counts  
29 from any cause were reported in ClinicalTrials.gov records. We then attempted to determine the  
30 total deaths per arm in a ClinicalTrials.gov results record and in the corresponding publication.  
31 Finally, we conducted a detailed review of cases with discrepancies in crude deaths to identify  
32 possible explanations.  
33  
34  
35  
36  
37  
38  
39  
40  
41  
42  
43  
44  
45  
46  
47  
48  
49  
50  
51  
52  
53  
54  
55  
56  
57  
58  
59  
60



## Methods

The ClinicalTrials.gov team provided us with a database of results records indexed in ClinicalTrials.gov (search date July 12, 2011). The database contained all records of phase II, III, or IV interventional trials with results entered between September 9, 2009 and June 14, 2011. In 500 randomly selected records, we examined the record for reporting of any death counts. This entailed review of three of the four scientific data modules, i.e. participant flow, primary and secondary outcomes, and serious adverse events, but not baseline characteristics. Appendix 1 shows screenshots for the three pertinent modules from a sample ClinicalTrials.gov record. We considered deaths counts only when a zero or a positive number for death was reported in any module, i.e. we did not derive death counts from information on deaths reported as percentages, rates, risks or survival curves. In 123 records reporting a crude death count, we examined in which module deaths were reported. Deaths from serious adverse events would presumably be a reason for not completing a trial and qualify to be listed as such in the participant flow module. We examined how many records reported death counts only in the serious adverse events module without reporting any deaths as a reason for discontinuation.

Among the 500 records, we also identified studies with an outcome measure description that implied ascertainment of death, including overall survival, time to mortality, all cause deaths, disease specific death, composite outcomes including death and serious adverse events including deaths. In this subset, we examined how often actual death counts were reported as part of the primary or secondary outcome module when the outcome suggested that number of deaths were collected.

We then compared death reporting between ClinicalTrials.gov results records and corresponding publications. To select a sample, we used 2 criteria: 1) ClinicalTrials.gov records had to provide only a single PubMed Identifier (PMID) matching a publication describing trial

1  
2  
3 results to avoid the need for reconciliation across several publications, and 2) publications had  
4 to be electronically accessible through our library. Based on these two criteria, we retrieved 75  
5  
6 matching publications of which 27 corresponded to ClinicalTrials.gov records that reported  
7  
8 deaths. We sampled another 27 pairs where the ClinicalTrials.gov record did not report deaths.  
9  
10 For each record or publication, we attempted to determine the total deaths per arm and the  
11  
12 numbers randomized or analyzed per arm based on the data available in the record and  
13  
14 publication, without contacting authors. This required assumptions when reconciling death  
15  
16 counts across the three pertinent modules in the ClinicalTrials.gov record. For the publications,  
17  
18 we searched the sections of the article corresponding to the modules. We used the following  
19  
20 operational rules for decision-making:  
21  
22  
23

- 24 • If a report did not provide direct information on death counts, no counts were implied.
- 25  
26 • If a death count was reported in only one module in the ClinicalTrials.gov record or the  
27  
28 corresponding sections in the publication, i.e., either in participant flow, primary or  
29  
30 secondary outcome, or adverse events, this was determined to be the total death count.
- 31  
32 • Otherwise, as a default, the highest unambiguous number of deaths in one category was  
33  
34 taken as the total death count.  
35  
36  
37  
38  
39

40 When the death counts could be determined for both the ClinicalTrials.gov record and the  
41  
42 corresponding publication following these rules, we compared these death counts between the  
43  
44 record and the publication. Discrepant cases were reviewed in more detail. We extracted the  
45  
46 denominators for death counts from information on number started, randomized, or analyzed.  
47  
48 We further captured information on duration of follow-up and looked for possible reasons for  
49  
50 differences in death counts.  
51  
52  
53  
54  
55  
56  
57  
58  
59  
60

## Results

### *Reporting of crude death counts in ClinicalTrials.gov results records*

In July 2011, there were 1981 records with results in ClinicalTrials.gov and 500 records were randomly chosen for further analysis (Appendix Figure 1). These included 123 records (25%) which reported a death count in at least one module. Deaths were variably reported across the three modules of participant flow, primary or secondary outcome, and serious adverse events (Figure 1). Sixty-four percent of the records reported crude deaths only in one of the modules, 32% in two modules and 4% in all of them. Approximately one fifth (27/123) of the records reported crude death counts only in the module for the serious adverse events, i.e. there were no deaths reported in the participant flow as a reason for not completing the trial. One fifth (24/123) reported deaths in both of these modules.

Out of the 500 records, we identified 97 with a primary or secondary outcome measure definition that implied ascertainment of deaths. Of the 97, there were 32 (33%) that reported a crude death count in the primary or secondary outcome module, with or without a result for death in another metric. The 65 records that did not report crude death counts in the primary or secondary outcome module nonetheless still reported death counts under participant flow or serious adverse events.

### *Reporting of information on death, determination of total death counts per arm and congruency in matched pairs*

We examined congruence of reporting of deaths across pairs of ClinicalTrials.gov records and corresponding trial publications. Figure 2 tabulates whether there was any information on deaths in a trial report, and if so, whether total death counts could be determined per arm following simple rules, and finally whether the total counts per arm were concordant or discordant across pairs. We examined 27 pairs where the ClinicalTrials.gov record contained

1  
2  
3 some information on death counts and 27 pairs where the ClinicalTrials.gov record did not  
4  
5 contain any information on death.  
6  
7

8  
9  
10 Of the 27 pairs with information on death counts in the ClinicalTrials.gov record, there  
11  
12 were 15 (55%) in which the total death count per arm could be determined in both reports  
13  
14 (Figure 2, panel A). The death counts were concordant between the ClinicalTrials.gov record  
15  
16 and the publication in 10 pairs (37%), but discordant in five pairs (19%), while in the remaining  
17  
18 12 (44%), concordance could not be assessed. The five discordant pairs are shown in detail in  
19  
20 Table 1.  
21  
22

23  
24  
25 In the 27 pairs where the ClinicalTrials.gov record did not contain information on death,  
26  
27 14 (52%) pairs were concordant regarding the absence of information on deaths, i.e. the trial  
28  
29 publications also did not contain any information on deaths (Figure 2, panel B). However 13  
30  
31 (48%) publications contained information on death counts. In 9 studies (33%), the published  
32  
33 study affirmatively reported “no deaths” and in four studies, the published report mentioned  
34  
35 positive death counts (Figure 2, Panel B). These four cases are shown in Table 2. For example  
36  
37 in Case 9, the ClinicalTrials.gov record did not contain information on death; but, the publication  
38  
39 reported one death under serious adverse events (Table 2).  
40  
41  
42  
43

#### 44 *Review of cases with discrepant counts*

45  
46 Tables 1 and 2 show the detailed review of the cases with discrepant counts. For each  
47  
48 case, the crude death counts for each module or reporting location for the ClinicalTrials.gov  
49  
50 record and the corresponding publication are shown, as well as the total number of deaths per  
51  
52 arm that was determined following our operational rules. The summary contains comments and  
53  
54 interpretation of the discrepancies.  
55  
56  
57  
58  
59  
60

1  
2  
3  
4  
5  
6  
7  
8  
9  
10  
11  
12  
13  
14  
15  
16  
17  
18  
19  
20  
21  
22  
23  
24  
25  
26  
27  
28  
29  
30  
31  
32  
33  
34  
35  
36  
37  
38  
39  
40  
41  
42  
43  
44  
45  
46  
47  
48  
49  
50  
51  
52  
53  
54  
55  
56  
57  
58  
59  
60

In several cases, information on duration of follow-up or the time point of last assessment was not exact or varied across the reports. Comparison of death counts required reconciliation across reports with discrepant numbers of arms (Cases 5 and 6) or discrepant number of studies (Case 4). For example, in Case 5, the ClinicalTrials.gov record included two arms treated with different drug doses, while the publication reported results only for one of the arms. Ultimately the death counts for this one arm was consistent across the ClinicalTrials.gov record and the publication. In the other cases, however, the inference or certainty about the number of deaths per arm differed. In addition to discrepant counts, problems were lack of provision of crude deaths even when death was an outcome of interest (Cases 1 and 3), imprecision in data entry (Case 4), reporting of deaths under serious adverse events without specification as to whether they were counted as part of the death outcome (Case 4) or the participant flow (Case 7). In most cases, the publication included a slightly higher crude death count. Large discrepancies were noted in cases where the record did not report counts for an outcome that included death, while the report did (Cases 3 and 9).

## Discussion

Our study highlights a failure of consistent and clear reporting of death counts in clinical trials. Only 25% of ClinicalTrials.gov results records provided information on death counts, with great variation and overlap in the reporting across the three data modules for participant loss, primary or secondary outcomes, or serious adverse events. While we expected records reporting death as a serious adverse event to also list death as a reason for discontinuation from the trial in participant flow, a fifth of records reported deaths only under serious adverse events. Among trials with a definition for a primary or secondary outcome that implies ascertainment of death, only a third of ClinicalTrials.gov records provided crude death counts in the data module for the primary or secondary outcome. This heterogeneous reporting and the uncertainty of whether deaths are reported in a redundant or exclusive manner across data modules, poses problems for reconciling deaths within a trial report.

Following operational rules, total counts of deaths per arm could not always be determined unambiguously in the ClinicalTrials.gov results records or the corresponding publication. In the small sample where total deaths could be determined in both reports for the same trial, we identified examples where the death counts were discrepant, highlighting lack of coherence and completeness. There were no clear patterns to explain the discrepancies. Finding a slightly higher crude death count in publications than in ClinicalTrials.gov records suggests that death counts in the ClinicalTrials.gov records are not complete. This indicates a violation of the reporting expectations for ClinicalTrials.gov which includes death as a serious adverse event.

Our findings of haphazard reporting of deaths in clinical trials indicate a need for clarifying expectations in reporting and highlight differences in the legal standards for reporting of serious adverse events after trial completion<sup>6</sup> and expeditious real time reporting of serious

1  
2  
3 adverse events in ongoing trials.<sup>8,9</sup> We suggest that reporting formats for aggregate clinical trial  
4 results need to be amended to provide the following information: number of individuals who  
5 started per arm, number of deaths from any cause per arm and the time point of last  
6 ascertainment. This should prompt study investigators to sum up all deaths across participant  
7 loss, primary or secondary outcomes, and serious adverse events. Information on mean  
8 duration of follow-up is also needed to allow calculation of rates. Given their prominent role  
9 supported by the legal regulations, clinical trials registries can spearhead uniform and consistent  
10 reporting of important trial outcomes, such as deaths. Similarly editors and sponsors must  
11 educate trialists to better meet the need for uniform reporting of adverse events.<sup>11-13</sup>  
12  
13  
14  
15  
16  
17  
18  
19  
20  
21  
22  
23  
24

25 Our study has several limitations. We examined only a limited number of matched  
26 cases. Nevertheless, the discrepant findings even in these small samples demonstrate a clear  
27 disconnect between reporting expectations and reporting practices as illustrated by  
28 inconsistencies across reports of the same trial. Also, we used only data available in these  
29 reports to determine the total number of deaths per arm. It is possible that individual patient data  
30 available to the trial investigators would allow more studies to provide unambiguous death  
31 counts. However, this information is not publicly available and clinicians and policy makers rely  
32 on publicly accessible trial results reported in ClinicalTrials.gov records and in journal  
33 publications. Further, we only gave credit to death counts and not to alternate information on  
34 death, such as percents or survival analyses, as exact back calculations are not always  
35 possible. Finally, we followed operational rules to determine total deaths per arm within a report.  
36 These operational rules were not overly stringent and more rigid expectations would have  
37 resulted in fewer reports with the data amenable for detailed analysis.  
38  
39  
40  
41  
42  
43  
44  
45  
46  
47  
48  
49  
50  
51  
52  
53  
54

55 Our findings have to be viewed in context. Only 22% of studies report their results in  
56 ClinicalTrials.gov within one year of completion<sup>14</sup> and fewer than half of studies funded by the  
57  
58  
59  
60

1  
2  
3 National Institutes of Health publish their results in a Medline indexed journal within 30 months  
4 of trial completion<sup>15</sup>. Thus our matched pairs are drawn from a minority of trials that have been  
5 compliant with both expectations: publication of results in ClinicalTrials.gov and publication in a  
6 peer reviewed journal.  
7  
8  
9  
10

11  
12  
13  
14 Full reporting of all deaths enables more accurate assessment of risks and benefits  
15 associated with treatments. Assessment of patient safety relies on capturing signals, even when  
16 they are non-specific<sup>16;17</sup>. Thus from an ethical perspective, it is desirable that trials ascertain  
17 and report all deaths regardless of whether they appear to be related to study conduct or  
18 intervention, are unforeseen or non-specific. Death reporting may never be complete or simple  
19 given the challenges in ascertainment and adjudication. Even with a clear instructions and  
20 prompts for trials to report deaths, there may be uncertainty depending on the rigor of  
21 ascertainment or surveillance and the choice of trial outcomes. Crude numbers are not the only  
22 format for reporting deaths in a trial. Time to event reporting may be more meaningful, but may  
23 introduce uncertainty about how censoring and deaths are handled. Thus both approaches to  
24 presenting information on deaths may be necessary and complementary, but our study  
25 suggests that some improvement could be made with simple means of standardized reporting  
26 formats.  
27  
28  
29  
30  
31  
32  
33  
34  
35  
36  
37  
38  
39  
40  
41  
42  
43  
44

45 In summary, our study shows lack of clarity, consistency and agreement in reporting of  
46 all cause death counts in clinical trials. This highlights the need for unambiguous templates to  
47 standardize reporting of total death counts per arm in ClinicalTrials.gov records and more  
48 stringent reporting guidelines for peer reviewed publications.  
49  
50  
51  
52  
53  
54  
55  
56  
57  
58  
59  
60



1  
2  
3 **Data Sharing Statement:** There is no additional available.  
4  
5  
6

7  
8 **Copyright:** The Corresponding Author has the right to grant on behalf of all authors and does  
9 grant on behalf of all authors, a worldwide license to the Publishers and its licensees in  
10 perpetuity, in all forms, formats and media (whether known now or created in the future), to i)  
11 publish, reproduce, distribute, display and store the Contribution, ii) translate the Contribution  
12 into other languages, create adaptations, reprints, include within collections and create  
13 summaries, extracts and/or, abstracts of the Contribution, iii) create any other derivative work(s)  
14 based on the Contribution, iv) to exploit all subsidiary rights in the Contribution, v) the inclusion  
15 of electronic links from the Contribution to third party material where-ever it may be located;  
16 and, vi) license any third party to do any or all of the above.  
17  
18  
19  
20  
21  
22  
23  
24  
25  
26  
27  
28

29 **Contributors:** Concept and design: AE, JL, KU; Interpretation of data: AE, JL, KU; Drafting  
30 article: AE, KU; Revision of article for important intellectual content: AE, JL, KU  
31  
32  
33  
34  
35

### 36 **Funding:**

37  
38 This project was funded under Contract No. HHS 290 2007-10055-I, entitled "Evidence-based  
39 Protocol for Reviewing ClinicalTrials.gov Results Database," from the Agency for Healthcare  
40 Research and Quality, U.S. Department of Health and Human Services. The authors of this  
41 report are responsible for its content. Statements in the report should not be construed as  
42 endorsement by the Agency for Healthcare Research and Quality or the U.S. Department of  
43 Health and Human Services.  
44  
45  
46  
47  
48  
49  
50

51  
52  
53 **Competing interests:** All authors have completed the ICMJE uniform disclosure form at  
54 [www.icmje.org/coi\\_disclosure.pdf](http://www.icmje.org/coi_disclosure.pdf) and declare that there are no conflicts of interest.  
55  
56  
57  
58  
59  
60

**Tables**

Table 1. Cases with death counts in ClinicalTrials.gov record that are discrepant with the corresponding publication

Table 2. Cases without information on death in ClinicalTrials.gov record but reports of death counts in the corresponding publication

**Figures**

Figure 1. Reporting of death counts by data module in 123 ClinicalTrials.gov records

Figure 2. Consistency of death in matched pairs in (A) those with death counts in ClinicalTrials.gov and (B) those without information on death in ClinicalTrials.gov

**Appendices**

Appendix Figure 1. Study Flow

Appendix 2. Examples of death counts reported in modules of ClinicalTrials.gov records

## Reference List

- 1  
2  
3  
4  
5  
6  
7  
8  
9  
10  
11  
12  
13  
14  
15  
16  
17  
18  
19  
20  
21  
22  
23  
24  
25  
26  
27  
28  
29  
30  
31  
32  
33  
34  
35  
36  
37  
38  
39  
40  
41  
42  
43  
44  
45  
46  
47  
48  
49  
50  
51  
52  
53  
54  
55  
56  
57  
58  
59  
60
- (1) Chou R, Helfand M. Challenges in systematic reviews that assess treatment harms. *Ann Intern Med* 2005; 142:1090-1099.
- (2) Ioannidis JP, Lau J. Completeness of safety reporting in randomized trials: an evaluation of 7 medical areas. *JAMA* 2001; 285:437-443.
- (3) Zarin DA, Tse T, Williams RJ, et al. The ClinicalTrials.gov results database--update and key issues. *N Engl J Med* 2011; 364:852-860.
- (4) Tse T, Williams RJ, Zarin DA. Reporting "basic results" in ClinicalTrials.gov. *Chest* 2009; 136:295-303.
- (5) FDAAA. U.S. Public Law 110-85. <http://clinicaltrials.gov/ct2/invest> . 2012. Accessed: 6-26-2012.  
Ref Type: Online Source
- (6) Food and Drug Administration Amendments Act of 2007. Public Law 110-95. 2007.  
Ref Type: Bill/Resolution
- (7) ClinicalTrials.gov. ClinicalTrials.gov "Basic Results" Data Element Definitions. [http://prsinfo.clinicaltrials.gov/results\\_definitions.html#AdverseEvents](http://prsinfo.clinicaltrials.gov/results_definitions.html#AdverseEvents) . 2012. Accessed: 6-26-2012.  
Ref Type: Online Source
- (8) Investigational new drug safety reporting requirements for human drug and biological products and safety reporting requirements for bioavailability and bioequivalence studies in humans. Final rule. *Fed Regist* 2010; 75:59935-59963.
- (9) Sherman RB, Woodcock J, Norden J, et al. New FDA regulation to improve safety reporting in clinical trials. *N Engl J Med* 2011; 365:3-5.
- (10) Lauer MS, Blackstone EH, Young JB, et al. Cause of death in clinical research: time for a reassessment? *J Am Coll Cardiol* 1999; 34:618-620.
- (11) Schulz KF, Altman DG, Moher D. CONSORT 2010 statement: updated guidelines for reporting parallel group randomized trials. *Ann Intern Med* 2010; 152:726-732.
- (12) Ioannidis JP, Evans SJ, Gotzsche PC, et al. Better reporting of harms in randomized trials: an extension of the CONSORT statement. *Ann Intern Med* 2004; 141:781-788.
- (13) Mansi BA, Clark J, David FS, et al. Ten recommendations for closing the credibility gap in reporting industry-sponsored clinical research: a joint journal and pharmaceutical industry perspective. *Mayo Clin Proc* 2012; 87:424-429.
- (14) Prayle AP, Hurley MN, Smyth AR. Compliance with mandatory reporting of clinical trial results on ClinicalTrials.gov: cross sectional study. *BMJ* 2012; 344:d7373.
- (15) Ross JS, Tse T, Zarin DA, et al. Publication of NIH funded trials registered in ClinicalTrials.gov: cross sectional analysis. *BMJ* 2012; 344:d7292.

- (16) Drazen JM. COX-2 inhibitors--a lesson in unexpected problems. *N Engl J Med* 2005; 352:1131-1132.
- (17) Nissen SE, Wolski K. Rosiglitazone revisited: an updated meta-analysis of risk for myocardial infarction and cardiovascular mortality. *Arch Intern Med* 2010; 170:1191-1201.

For peer review only

1  
2  
3  
4  
5  
6  
7  
8  
9  
10  
11  
12  
13  
14  
15  
16  
17  
18  
19  
20  
21  
22  
23  
24  
25  
26  
27  
28  
29  
30  
31  
32  
33  
34  
35  
36  
37  
38  
39  
40  
41  
42  
43  
44  
45  
46  
47  
48  
49  
50  
51  
52  
53  
54  
55  
56  
57  
58  
59  
60

**Table 1: Cases with death counts in ClinicalTrials.gov record that are discrepant with the corresponding publication**

| Population                 | Was death a specified outcome? <sup>1</sup> , Define                                                                                                                                                                                                                                                                                                                                                                                                                                                                                                                                                                                                       | Reporting module or location | ClinicalTrials.gov record                                              |                    | Publication                                                                     |         |
|----------------------------|------------------------------------------------------------------------------------------------------------------------------------------------------------------------------------------------------------------------------------------------------------------------------------------------------------------------------------------------------------------------------------------------------------------------------------------------------------------------------------------------------------------------------------------------------------------------------------------------------------------------------------------------------------|------------------------------|------------------------------------------------------------------------|--------------------|---------------------------------------------------------------------------------|---------|
|                            |                                                                                                                                                                                                                                                                                                                                                                                                                                                                                                                                                                                                                                                            |                              | Deaths/Randomized                                                      |                    | Deaths/Randomized                                                               |         |
|                            |                                                                                                                                                                                                                                                                                                                                                                                                                                                                                                                                                                                                                                                            |                              | Arm 1                                                                  | Arm 2              | Arm 1                                                                           | Arm 2   |
| <b>Case 1</b>              |                                                                                                                                                                                                                                                                                                                                                                                                                                                                                                                                                                                                                                                            |                              |                                                                        |                    |                                                                                 |         |
| Lung cancer                | Yes<br>Survival is a secondary outcome                                                                                                                                                                                                                                                                                                                                                                                                                                                                                                                                                                                                                     |                              | Follow up: While on study drug + 30 d after last dose (estimated 4 mo) |                    | Follow up: From random assignment until first day of progression or until death |         |
|                            |                                                                                                                                                                                                                                                                                                                                                                                                                                                                                                                                                                                                                                                            | Flow                         | /52                                                                    | -/51               | 4/52                                                                            | 2/51    |
|                            |                                                                                                                                                                                                                                                                                                                                                                                                                                                                                                                                                                                                                                                            | Outcome                      | -/52                                                                   | -/51               | --                                                                              | --      |
|                            |                                                                                                                                                                                                                                                                                                                                                                                                                                                                                                                                                                                                                                                            | SAE                          | 1/52                                                                   | 0/51               | 1/52                                                                            | 2/51    |
|                            |                                                                                                                                                                                                                                                                                                                                                                                                                                                                                                                                                                                                                                                            | <b>Total</b>                 | >1/52                                                                  | >0/51              | >4/52                                                                           | >2/51   |
| <b>Summary</b>             | Both CT.gov record and the publication reported hazards ratios for survival and mean survival in months, but not the number of deaths for the outcome. Both reported deaths under serious adverse events, but counts differed between record and report. In addition the publication reported deaths in the flow diagram, while the record did not. The total number of deaths is discrepant between record and publication; however, neither is likely to represent the total number of deaths that occurred during the study.                                                                                                                            |                              |                                                                        |                    |                                                                                 |         |
| <b>Case 2</b>              |                                                                                                                                                                                                                                                                                                                                                                                                                                                                                                                                                                                                                                                            |                              |                                                                        |                    |                                                                                 |         |
| Multiple myeloma           | No                                                                                                                                                                                                                                                                                                                                                                                                                                                                                                                                                                                                                                                         |                              | Follow up: Up to 18 mo                                                 |                    | Follow up: Enrolled 2/06-12/06, analysis through 8/2007                         |         |
|                            |                                                                                                                                                                                                                                                                                                                                                                                                                                                                                                                                                                                                                                                            | Flow                         | 1/53                                                                   | 1/43               | 1/53                                                                            | 1/43    |
|                            |                                                                                                                                                                                                                                                                                                                                                                                                                                                                                                                                                                                                                                                            | Outcome                      | -/53                                                                   | -/41               | --                                                                              | --      |
|                            |                                                                                                                                                                                                                                                                                                                                                                                                                                                                                                                                                                                                                                                            | SAE                          | -/53                                                                   | -/42               | 4/53                                                                            | 1/42    |
|                            |                                                                                                                                                                                                                                                                                                                                                                                                                                                                                                                                                                                                                                                            | <b>Total</b>                 | 1/53                                                                   | 1/43               | 4/53                                                                            | 1/43    |
| <b>Summary</b>             | Both CT.gov record and publication reported 1 death per arm in the participant flow. The total number of deaths is discrepant between record and publication, however, since the publication also reported 5 deaths under SAE.                                                                                                                                                                                                                                                                                                                                                                                                                             |                              |                                                                        |                    |                                                                                 |         |
| <b>Case 3</b>              |                                                                                                                                                                                                                                                                                                                                                                                                                                                                                                                                                                                                                                                            |                              |                                                                        |                    |                                                                                 |         |
| Refractory prostate cancer | Yes<br>Survival is the primary outcome                                                                                                                                                                                                                                                                                                                                                                                                                                                                                                                                                                                                                     |                              | Follow up: Analyzed through 9/2009                                     |                    | Follow up: Analyzed through 9/2009                                              |         |
|                            |                                                                                                                                                                                                                                                                                                                                                                                                                                                                                                                                                                                                                                                            | Flow                         | -/377                                                                  | -/378              | -/377                                                                           | -/378   |
|                            |                                                                                                                                                                                                                                                                                                                                                                                                                                                                                                                                                                                                                                                            | Outcome                      | -/377                                                                  | -/378              | 279/377                                                                         | 234/378 |
|                            |                                                                                                                                                                                                                                                                                                                                                                                                                                                                                                                                                                                                                                                            | SAE                          | 0/371 sudden death                                                     | 1/371 sudden death | 275/371                                                                         | 227/371 |
|                            |                                                                                                                                                                                                                                                                                                                                                                                                                                                                                                                                                                                                                                                            | <b>Total</b>                 | >0/377                                                                 | >1/371             | 279/377                                                                         | 234/378 |
| <b>Summary</b>             | The CT.gov record reported hazards ratios for survival as well as survival in months, but not the total number of deaths per arm for this outcome. The publication reported a large number of deaths per arms for the outcome of survival (as) and also a large number of deaths under SAE. The numerators and denominators differed slightly based on intention to treat analyses or per protocol analyses. The CT.gov record reported only one death under SAE; although based on the survival analysis, it appeared likely that the total number of deaths in the study was higher. The total number of deaths is discrepant between record and report. |                              |                                                                        |                    |                                                                                 |         |
| <b>Case 4</b>              |                                                                                                                                                                                                                                                                                                                                                                                                                                                                                                                                                                                                                                                            |                              |                                                                        |                    |                                                                                 |         |
| Chronic Obstructive        | Yes<br>Death is a secondary                                                                                                                                                                                                                                                                                                                                                                                                                                                                                                                                                                                                                                |                              | Follow up: 52 wk                                                       |                    | Follow up: 52 wk                                                                |         |
|                            |                                                                                                                                                                                                                                                                                                                                                                                                                                                                                                                                                                                                                                                            | Flow                         | -/772                                                                  | -/796              | -/772                                                                           | -/796   |
|                            |                                                                                                                                                                                                                                                                                                                                                                                                                                                                                                                                                                                                                                                            | Outcome                      | -/25                                                                   | -/25               | 25/772                                                                          | 25/796  |

<sup>1</sup> In the ClinicalTrials.gov record

1  
2  
3  
4  
5  
6  
7  
8  
9  
10  
11  
12  
13  
14  
15  
16  
17  
18  
19  
20  
21  
22  
23  
24  
25  
26  
27  
28  
29  
30  
31  
32  
33  
34  
35  
36  
37  
38  
39  
40  
41  
42  
43  
44  
45  
46  
47  
48  
49

|                   |                                                                                                                                                                                                                                                                                                                                                                                                                                                                                                                                                                                                                                                                               |                                                             |                                    |                                    |                                       |        |
|-------------------|-------------------------------------------------------------------------------------------------------------------------------------------------------------------------------------------------------------------------------------------------------------------------------------------------------------------------------------------------------------------------------------------------------------------------------------------------------------------------------------------------------------------------------------------------------------------------------------------------------------------------------------------------------------------------------|-------------------------------------------------------------|------------------------------------|------------------------------------|---------------------------------------|--------|
| Pulmonary Disease | outcome                                                                                                                                                                                                                                                                                                                                                                                                                                                                                                                                                                                                                                                                       | SAE                                                         | 1/778 sudden death;<br>0/778 death | 3/790 sudden death;<br>2/790 death | -/778                                 | -/790  |
|                   | <b>Total</b>                                                                                                                                                                                                                                                                                                                                                                                                                                                                                                                                                                                                                                                                  |                                                             | 25/772                             | 25/796                             | 25/772                                | 25/796 |
| <b>Summary</b>    | The CT.gov record reported 25 per arm as number analyzed in the outcome module and defined the number analyzed as the number died. Further, the CT.gov record reports deaths under SAE using two different death definitions ('sudden death' and 'death'), while the publication does not report any. Assuming that the deaths reported under SAE in the record are included in those reported for the outcome of death, the total number of deaths is consistent across record and publication. The publication describes 2 trials of similar design with two separate NCT number, but only the results corresponding to the trial in the index CT.gov record were compared. |                                                             |                                    |                                    |                                       |        |
| <b>Case 5</b>     |                                                                                                                                                                                                                                                                                                                                                                                                                                                                                                                                                                                                                                                                               |                                                             |                                    |                                    |                                       |        |
| Prostate cancer   | Yes<br>Death is a<br>secondary<br>outcome                                                                                                                                                                                                                                                                                                                                                                                                                                                                                                                                                                                                                                     | Follow up: From start of therapy up to 30 d after last dose |                                    |                                    | Follow up: Duration of therapy + 30 d |        |
|                   |                                                                                                                                                                                                                                                                                                                                                                                                                                                                                                                                                                                                                                                                               | Flow                                                        | -/48                               | -/47                               | --                                    | -/47   |
|                   |                                                                                                                                                                                                                                                                                                                                                                                                                                                                                                                                                                                                                                                                               | Outcome                                                     | 2/48                               | 2/47                               | --                                    | -/47   |
|                   |                                                                                                                                                                                                                                                                                                                                                                                                                                                                                                                                                                                                                                                                               | SAE                                                         | -/95                               |                                    | --                                    | 2/47   |
| <b>Total</b>      |                                                                                                                                                                                                                                                                                                                                                                                                                                                                                                                                                                                                                                                                               | 2/48                                                        | 2/47                               | --                                 | 2/47                                  |        |
| <b>Summary</b>    | The CT.gov record reported results for 2 arms. The publication presents only results for Arm 2. The CT.gov report shows 2 deaths in the outcome module, but none under SAE. The publication shows 2 deaths under SAE. The number of deaths reported for this arm was consistent between record and publication.                                                                                                                                                                                                                                                                                                                                                               |                                                             |                                    |                                    |                                       |        |

Data collection in ClinicalTrials.gov on Feb 14 2012

Abbreviations: CT.gov, ClinicalTrials.gov; D/C, discontinuation; NCT, National Clinical Trial (number); SAE, serious adverse events; -- (dash), not reported;

**Table 2. Cases without information on death in ClinicalTrials.gov record but reports of death counts in the corresponding publication**

| Population                    | Was death a specified outcome?, Define                                                                                                                                                                                           | Reporting module or location | ClinicalTrials.gov record           |       |       |        | Publication                                                                     |         |        |
|-------------------------------|----------------------------------------------------------------------------------------------------------------------------------------------------------------------------------------------------------------------------------|------------------------------|-------------------------------------|-------|-------|--------|---------------------------------------------------------------------------------|---------|--------|
|                               |                                                                                                                                                                                                                                  |                              | Deaths/Randomized                   |       |       |        | Deaths/Randomized                                                               |         |        |
|                               |                                                                                                                                                                                                                                  |                              | Arm 1                               |       | Arm 2 |        | Arm 1                                                                           | Arm 2   |        |
| <b>Case 6</b>                 |                                                                                                                                                                                                                                  |                              |                                     |       |       |        |                                                                                 |         |        |
| Influenza vaccine in elderly  | No                                                                                                                                                                                                                               |                              | Follow up: 6 mo                     |       |       |        | Follow up: 6 mo                                                                 |         |        |
|                               |                                                                                                                                                                                                                                  |                              | Flow                                | -/857 | -/848 | -/870  | -/1262                                                                          | -/2575  | -/1262 |
|                               |                                                                                                                                                                                                                                  |                              | Outcome                             | --    | --    | --     | --                                                                              | --      | --     |
|                               |                                                                                                                                                                                                                                  |                              | SAE                                 | -/855 | -/848 | -/870  | -/1260                                                                          | 16/2573 | 7/1260 |
|                               |                                                                                                                                                                                                                                  | <b>Total</b>                 | -/2575                              |       |       | -/1262 | 7/1262                                                                          |         |        |
| <b>Summary</b>                | The CT.gov record did not report deaths counts across 4 arms. The publication described 23 deaths under SAE for 2 arms, collapsing arms 1-3 into one.                                                                            |                              |                                     |       |       |        |                                                                                 |         |        |
| <b>Case 7</b>                 |                                                                                                                                                                                                                                  |                              |                                     |       |       |        |                                                                                 |         |        |
| Amyotrophic lateral sclerosis | No                                                                                                                                                                                                                               |                              | Follow up: 9 mo                     |       |       |        | Follow up: 10 mo                                                                |         |        |
|                               |                                                                                                                                                                                                                                  |                              | Flow                                | -/75  |       | -/75   | 3/75                                                                            | 5/75    |        |
|                               |                                                                                                                                                                                                                                  |                              | Outcome                             | -/75  |       | -/75   | --                                                                              | --      |        |
|                               |                                                                                                                                                                                                                                  |                              | SAE                                 | -/75  |       | -/75   | 3/75                                                                            | 5/75    |        |
|                               |                                                                                                                                                                                                                                  | <b>Total</b>                 | -/75                                |       | -/75  | 3/75   | 5/75                                                                            |         |        |
| <b>Summary</b>                | The CT.gov record did not report death counts. The publication describes 8 deaths under participant flow as well as under SAE, which are presumably the same.                                                                    |                              |                                     |       |       |        |                                                                                 |         |        |
| <b>Case 8</b>                 |                                                                                                                                                                                                                                  |                              |                                     |       |       |        |                                                                                 |         |        |
| Diabetes Mellitus Type 2      | No                                                                                                                                                                                                                               |                              | Follow up: 26 wk                    |       |       |        | Follow up: 26 wk                                                                |         |        |
|                               |                                                                                                                                                                                                                                  |                              | Flow                                | -/239 |       | -/241  | -/239                                                                           | -/241   |        |
|                               |                                                                                                                                                                                                                                  |                              | Outcome                             | --    |       | --     | --                                                                              | --      |        |
|                               |                                                                                                                                                                                                                                  |                              | SAE                                 | -/231 |       | -/238  | 0/231                                                                           | 1/238   |        |
|                               |                                                                                                                                                                                                                                  | <b>Total</b>                 | -/239                               |       | -/241 | 0/239  | 1/241                                                                           |         |        |
| <b>Summary</b>                | The CT.gov record did not report death counts. The publication describes one death under SAE as a 'treatment emergent death'. It also reported 2 deaths during the run-in period that were not included in the participant flow. |                              |                                     |       |       |        |                                                                                 |         |        |
| <b>Case 9</b>                 |                                                                                                                                                                                                                                  |                              |                                     |       |       |        |                                                                                 |         |        |
| Metastatic penile cancer      | No (in record); Y (in publication) Overall survival was a reported outcome, unclear whether primary or secondary                                                                                                                 |                              | Follow up: 'Timeframe 9 y and 6 mo' |       |       |        | Follow up: Duration of enrollment 4/2000 through 9/2008 (max FU up to 7 y 5 mo) |         |        |
|                               |                                                                                                                                                                                                                                  |                              | Flow                                | -/30  |       | -/30   | -/30                                                                            | -/30    |        |
|                               |                                                                                                                                                                                                                                  |                              | Outcome                             | -/30  |       | -/30   | 20/30                                                                           | 20/30   |        |
|                               |                                                                                                                                                                                                                                  |                              | SAE                                 | -/30  |       | -/30   | --                                                                              | --      |        |
|                               |                                                                                                                                                                                                                                  | <b>Total</b>                 | -/30                                |       | -/30  | 20/30  | 20/30                                                                           |         |        |
| <b>Summary</b>                | The CT.gov record did not include death counts even though "overall survival" was a pre-specified outcome. The publication reported 20 deaths for this outcome.                                                                  |                              |                                     |       |       |        |                                                                                 |         |        |

Data collection in ClinicalTrials.gov on Feb 14 2012

Abbreviations: CT.gov, ClinicalTrials.gov; D/C, discontinuation; NCT, National Clinical Trial (number); SAE, serious adverse events; -- (dash), not reported;

1  
2  
3  
4  
5  
6  
7  
8  
9  
10  
11  
12  
13  
14  
15  
16  
17  
18  
19  
20  
21  
22  
23  
24  
25  
26  
27  
28  
29  
30  
31  
32  
33  
34  
35  
36  
37  
38  
39  
40  
41  
42  
43  
44  
45  
46  
47  
48  
49  
50  
51  
52  
53  
54  
55  
56  
57  
58  
59  
60

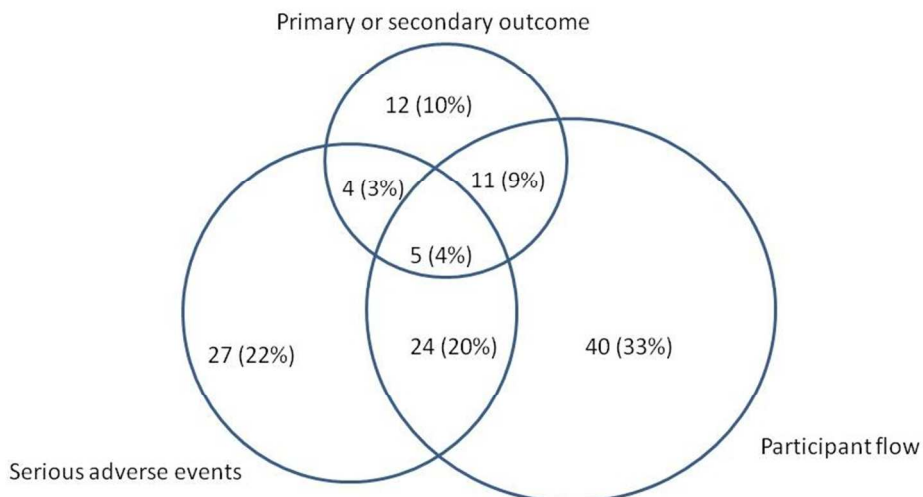

Figure 1. Reporting of death counts by data module in 123 ClinicalTrials.gov records  
254x190mm (96 x 96 DPI)

Review only



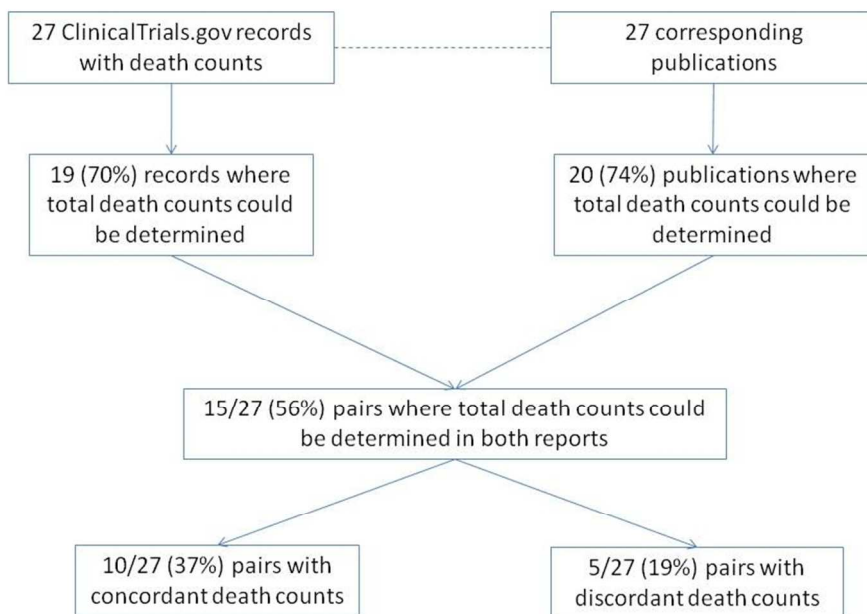

Figure 2. Consistency of death in matched pairs in (A) those with death counts in ClinicalTrials.gov and (B) those without information on death in ClinicalTrials.gov  
 254x190mm (96 x 96 DPI)

ew only

1  
2  
3  
4  
5  
6  
7  
8  
9  
10  
11  
12  
13  
14  
15  
16  
17  
18  
19  
20  
21  
22  
23  
24  
25  
26  
27  
28  
29  
30  
31  
32  
33  
34  
35  
36  
37  
38  
39  
40  
41  
42  
43  
44  
45  
46  
47  
48  
49  
50  
51  
52  
53  
54  
55  
56  
57  
58  
59  
60

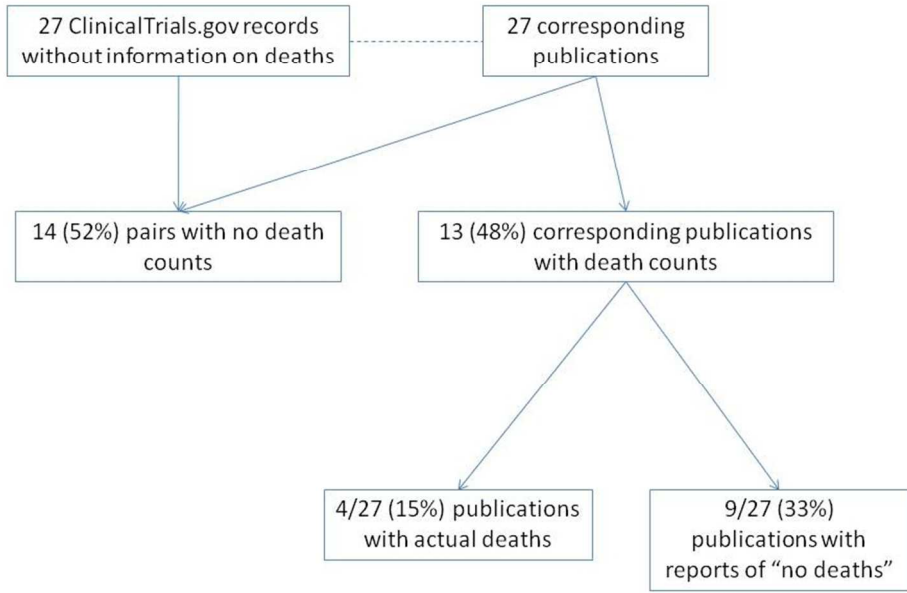

254x190mm (96 x 96 DPI)

Review only

1  
2  
3  
4  
5  
6  
7  
8  
9  
10  
11  
12  
13  
14  
15  
16  
17  
18  
19  
20  
21  
22  
23  
24  
25  
26  
27  
28  
29  
30  
31  
32  
33  
34  
35  
36  
37  
38  
39  
40  
41  
42  
43  
44  
45  
46  
47  
48  
49  
50  
51  
52  
53  
54  
55  
56  
57  
58  
59  
60

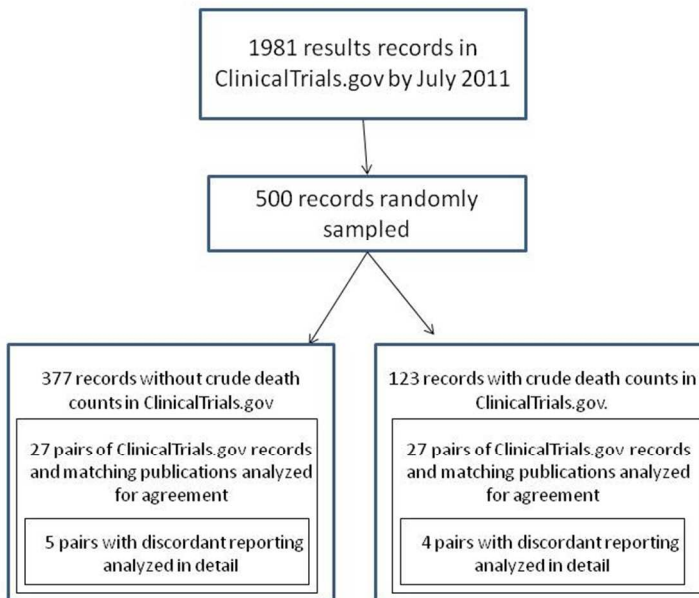

254x190mm (96 x 96 DPI)

Review only

## Appendix 2. Examples death counts reported in modules in ClinicalTrials.gov records

### Primary of secondary outcome

#### Measured Values

|                                                                                               | Evaluable Patients |
|-----------------------------------------------------------------------------------------------|--------------------|
| <b>Number of Participants Analyzed</b><br>[units: participants]                               | 15                 |
| <b>Number of Participants (Patients) Who Died Due to Transplant.</b><br>[units: Participants] | 4                  |

No statistical analysis provided for Number of Participants (Patients) Who Died Due to Transplant

### Serious Adverse Events

#### Serious Adverse Events

|                                               | Home Monitoring  | Conventional    |
|-----------------------------------------------|------------------|-----------------|
| <b>Total, serious adverse events</b>          |                  |                 |
| <b># participants affected / at risk</b>      | 124/977 (12.69%) | 74/473 (15.64%) |
| <b>Cardiac disorders</b>                      |                  |                 |
| <b>Cardiac related hospitalizations †</b>     |                  |                 |
| <b># participants affected / at risk</b>      | 45/977 (4.61%)   | 31/473 (6.55%)  |
| <b># events</b>                               | 64               | 35              |
| <b>General disorders</b>                      |                  |                 |
| <b>Death †</b>                                |                  |                 |
| <b># participants affected / at risk</b>      | 52/977 (5.32%)   | 26/473 (5.50%)  |
| <b># events</b>                               | 52               | 26              |
| <b>Non-cardiac related hospitalizations †</b> |                  |                 |
| <b># participants affected / at risk</b>      | 16/977 (1.64%)   | 3/473 (0.63%)   |
| <b># events</b>                               | 20               | 4               |

## Participant Flow

## Participant Flow: Overall Study

|                                  | Docetaxel + Sunitinib | Docetaxel  |
|----------------------------------|-----------------------|------------|
| <b>STARTED</b>                   | <b>296</b>            | <b>297</b> |
| <b>Treated</b>                   | <b>295</b>            | <b>293</b> |
| <b>COMPLETED</b>                 | <b>0</b>              | <b>0</b>   |
| <b>NOT COMPLETED</b>             | <b>296</b>            | <b>297</b> |
| Study Ongoing                    | 19                    | 31         |
| Protocol Violation               | 1                     | 1          |
| Lost to Follow-up                | 2                     | 5          |
| Death                            | 10                    | 4          |
| Objective Progression or Relapse | 227                   | 206        |
| Participant refused              | 3                     | 7          |
| Unspecified                      | 34                    | 43         |

review only

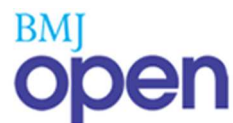

**Haphazard Reporting of Deaths in Clinical Trials – a Review  
of Cases of ClinicalTrials.gov Records and Matched  
Publications: cross-sectional study**

|                                 |                                                                                                                                                                                            |
|---------------------------------|--------------------------------------------------------------------------------------------------------------------------------------------------------------------------------------------|
| Journal:                        | <i>BMJ Open</i>                                                                                                                                                                            |
| Manuscript ID:                  | bmjopen-2012-001963.R1                                                                                                                                                                     |
| Article Type:                   | Research                                                                                                                                                                                   |
| Date Submitted by the Author:   | 16-Oct-2012                                                                                                                                                                                |
| Complete List of Authors:       | Earley, Amy; Tufts Medical Center, Tufts Evidence-based Practice Center<br>Lau, Joseph; Tufts Medical Center, Tufts Evidence-based Practice Center<br>Uhlig, Katrin; Tufts Medical Center, |
| <b>Primary Subject Heading</b>: | Medical publishing and peer review                                                                                                                                                         |
| Secondary Subject Heading:      | Evidence based practice                                                                                                                                                                    |
| Keywords:                       | EPIDEMIOLOGY, PUBLIC HEALTH, STATISTICS & RESEARCH METHODS,<br>QUALITATIVE RESEARCH                                                                                                        |
|                                 |                                                                                                                                                                                            |

SCHOLARONE™  
Manuscripts

1  
2  
3 **Haphazard Reporting of Deaths in Clinical Trials – a Review of Cases of ClinicalTrials.gov**  
4  
5 **Records and Matched Publications: a cross-sectional study**  
6  
7

8  
9  
10 Amy Earley BS research associate<sup>1</sup>, Joseph Lau MD professor of medicine<sup>1,2</sup>, Katrin  
11  
12 Uhlig MD MS associate professor of medicine<sup>1,2,3</sup>  
13

14  
15  
16 Author affiliations:  
17

18  
19 <sup>1</sup> Tufts Evidence-based Practice Center, Tufts Medical Center, Boston, MA 02111, US  
20

21 <sup>2</sup> Tufts University School of Medicine, Boston, MA 02111, US  
22

23 <sup>3</sup> Division of Nephrology, Department of Medicine, Tufts Medical Center, Boston, MA  
24  
25 02111, US  
26  
27

28  
29  
30 Corresponding author:  
31

32  
33 Katrin Uhlig MD, MS  
34

35  
36 Tufts Medical Center  
37

38 800 Washington Street, #391  
39

40 Boston, Massachusetts, 02111, USA  
41

42 Email: kuhlig@tuftsmedicalcenter.org  
43  
44

45  
46 Word Count:  
47

48 Abstract: 287  
49

50 Manuscript Text: 2917  
51  
52  
53  
54  
55  
56  
57  
58  
59  
60

## Abstract

**Context:** A participant death is a serious event in a clinical trial and needs to be unambiguously and publicly reported.

**Objective:** To examine: 1) how often and how numbers of deaths are reported in ClinicalTrials.gov records; 2) how often total deaths can be determined per arm within a ClinicalTrials.gov results record and its corresponding publication; 3) whether counts may be discordant.

**Design:** Registry-based study of clinical trial results reporting

**Setting:** ClinicalTrials.gov results database searched in July 2011 and matched PubMed publications

**Selection criteria:** A random sample of ClinicalTrials.gov results records. Detailed review of records with a single corresponding publication.

**Main outcome measure:** ClinicalTrials.gov records reporting number of deaths under participant flow, primary or secondary outcome, or serious adverse events. Consistency in reporting of number of deaths between ClinicalTrials.gov records and corresponding publications.

**Results:** In 500 randomly selected ClinicalTrials.gov records, only 123 records (25%) reported a number for deaths. Reporting of deaths across data modules for participant flow, primary or secondary outcomes, and serious adverse events was variable. In a sample of 27 pairs of ClinicalTrials.gov records with number of deaths and corresponding publications, total deaths



1  
2  
3 per arm could only be determined in 56% (15/27 pairs) but were discordant in 19% (5/27). In 27  
4  
5 pairs of ClinicalTrials.gov records without any information on number of deaths, 48% (13/27)  
6  
7 were discordant since the publications reported absence of deaths in 33% (9/27) and positive  
8  
9 death numbers in 15% (4/27).  
10

11  
12  
13  
14 **Conclusions:** Deaths are variably reported in ClinicalTrials.gov records. A reliable total number  
15  
16 of deaths per arm cannot always be determined with certainty or can be discordant with number  
17  
18 reported in corresponding trial publications. This highlights a need for unambiguous and  
19  
20 complete reporting of number of deaths in trial registries and publications.  
21  
22  
23  
24  
25  
26  
27  
28  
29  
30  
31  
32  
33  
34  
35  
36  
37  
38  
39  
40  
41  
42  
43  
44  
45  
46  
47  
48  
49  
50  
51  
52  
53  
54  
55  
56  
57  
58  
59  
60

## Article Summary

### Article focus

- We hypothesized that the lack of clear expectations for reporting all deaths in clinical trials give rise to discrepancies in number of deaths reported across reports of a trial.

### Key messages

- There is a lack of clarity, consistency and agreement in reporting of deaths in clinical trials which highlights the need for unambiguous templates to standardize reporting of total number of deaths per arm in ClinicalTrials.gov records and more explicit reporting guidelines for peer reviewed publications.

### Strengths and limitations of this study

- Our findings indicate a need for explicit expectations for reporting of all deaths.
- We suggest amendments to reporting formats such as: number of participants who started per arm, total number of deaths from any cause per arm and the time point of last ascertainment to prompt study investigators to sum up all deaths across participant loss, primary or secondary outcomes, and serious adverse events.
- We examined only a limited number of matched cases. Nevertheless, even these small samples demonstrate ambiguity within records and inconsistencies across reports of the same trial.
- We used only data available in the publicly available reports and only counted actual number of deaths and not alternate information on death, such as percents or survival analyses, as exact back calculations are not always possible.

1  
2  
3  
4  
5  
6  
7  
8  
9  
10  
11  
12  
13  
14  
15  
16  
17  
18  
19  
20  
21  
22  
23  
24  
25  
26  
27  
28  
29  
30  
31  
32  
33  
34  
35  
36  
37  
38  
39  
40  
41  
42  
43  
44  
45  
46  
47  
48  
49  
50  
51  
52  
53  
54  
55  
56  
57  
58  
59  
60

- We followed operational rules to determine total deaths per arm within a report. These operational rules were not overly stringent and more rigid expectations would have resulted in fewer reports with the data amenable for detailed analysis.

For peer review only

## Introduction

The death of a clinical trial subject is a serious event that needs to be publicly disclosed. Incomplete reporting of deaths may overemphasize health benefits when benefits and harms of medical interventions are summarized.<sup>1;2</sup> For unambiguous reporting, all deaths have to be reported for each trial arm and the absence of deaths must be explicitly stated if none were known to have occurred.

Formal reporting expectations for public disclosure of deaths in clinical trials are complex. During a trial, the United States Food and Drug Administration (FDA) expects a sponsor of an investigational new drug to submit annual reports that include a list of subjects who died during participation in the investigation, with the cause of death for each subject<sup>3</sup>. This means all deaths must be reported to the FDA, regardless of cause.

Sponsors of investigational new drugs also need to promptly report to the FDA and trial investigators serious unexpected events if they are suspected adverse reactions, meaning that there is a “reasonable possibility” that the drug caused it<sup>4;5</sup>. Further, the FDA regulations specify that the sponsor report “an aggregate analysis of specific events observed in a clinical trial ...that indicates those events occur more frequently in the drug treatment group than in a concurrent or historical control group<sup>6</sup>” suggesting that the events may be caused by the drug.<sup>5</sup>

After trial completion, trial registries such as ClinicalTrials.gov provide Web-based public records of trial results of federally and privately funded trials.<sup>7</sup> Results reporting in ClinicalTrials.gov is mandated by the United States Food and Drug Administration (FDA) Amendments Act which requires the reporting of summary results for phase II-IV interventional studies of drugs, biological products, and devices within 1 year of completing data collection for the prespecified primary outcome.<sup>7-9</sup> Based on this Act, the results data bank of the ClinicalTrials.gov registry shall include “a table of anticipated and unanticipated serious adverse events grouped by organ system with number and frequency in each arms of the trial”<sup>10</sup>. The ClinicalTrials.gov data element definitions define adverse events as “unfavorable changes in

1  
2  
3 health ..., that occur in trial participants during the clinical trial or within a specified period  
4  
5 following the trial” and under serious adverse events include ”adverse events that result in  
6  
7 death”<sup>11</sup>. This reporting of deaths as a serious adverse event is currently the only requirement  
8  
9 for reporting of deaths in ClinicalTrials.gov and requires a judgment about the possibility of a  
10  
11 causal association. However, causality assessment may be a challenge.<sup>12</sup>  
12  
13

14 The peer reviewed publication of clinical trials is guided by CONSORT.<sup>13</sup> The main  
15  
16 reporting CONSORT guideline does not specify a need to report all deaths; however, the  
17  
18 extension for reporting of adverse events states that “Authors should always report deaths in  
19  
20 each study group during a trial, regardless of whether death is an end point and regardless of  
21  
22 whether attribution to a specific cause is possible”<sup>14</sup>.  
23  
24

25 We hypothesized that the complex reporting expectations for death give rise to  
26  
27 discordance in deaths documented across reports of a trial. We first examined how number of  
28  
29 deaths from any cause was reported in ClinicalTrials.gov records. We then attempted to  
30  
31 determine the total deaths per arm in a ClinicalTrials.gov results record and in the  
32  
33 corresponding publication. Finally, we conducted a detailed review of cases with discrepancies  
34  
35 in death numbers to identify possible explanations.  
36  
37  
38  
39  
40  
41  
42  
43  
44  
45  
46  
47  
48  
49  
50  
51  
52  
53  
54  
55  
56  
57  
58  
59  
60

## Methods

The ClinicalTrials.gov team provided us with a database of results records indexed in ClinicalTrials.gov (search date July 12, 2011). The database contained all records of phase II, III, or IV interventional trials with results entered between September 9, 2009 and June 14, 2011. In 500 randomly selected records, we examined the record for reporting of any number of deaths. This entailed review of three of the four scientific data modules, i.e. participant flow, primary and secondary outcomes, and serious adverse events, but not baseline characteristics. Appendix 1 shows screenshots for the three pertinent modules from a sample ClinicalTrials.gov record. We considered deaths only when a zero or a positive number for death was reported in any module, i.e. we did not derive death numbers from information on deaths reported as percentages, rates, risks, or survival curves. In the 123 records that reported some number of death, we examined in which module deaths were reported. Deaths from serious adverse events would presumably be a reason for not completing a trial and qualify to be listed as such in the participant flow module. We examined how many records reported number of deaths only in the serious adverse events module without reporting any deaths as a reason for discontinuation.

Among the 500 records, we also identified studies with an outcome measure description that implied ascertainment of death, including overall survival, time to mortality, all cause deaths, disease-specific death, composite outcomes including death and serious adverse events including deaths. In this subset, we examined how often actual numbers of deaths were reported as part of the primary or secondary outcome module when the outcome suggested that deaths were collected.

We then compared death reporting between ClinicalTrials.gov results records and corresponding publications. To select a sample of pairs, we used 2 criteria: 1) ClinicalTrials.gov records had to provide only a single PubMed Identifier (PMID) matching a publication describing trial results to avoid the need for reconciliation across several publications, and 2) publications

1  
2  
3 had to be electronically accessible through our library. Based on these two criteria, we retrieved  
4  
5 27 publications matching the ClinicalTrials.gov records that reported death numbers. We  
6  
7 sampled another 27 pairs of publications and ClinicalTrials.gov records where the record did not  
8  
9 report death numbers.  
10

11  
12 For each record or publication, we attempted to determine the total deaths per arm and  
13  
14 the numbers randomized or analyzed per arm based on the data available in the record and  
15  
16 publication, without contacting authors. This required assumptions when reconciling number of  
17  
18 deaths across the three pertinent modules in the ClinicalTrials.gov record. For the publications,  
19  
20 we searched the sections of the article corresponding to the modules. We used the following  
21  
22 operational rules for decision-making:  
23

- 24  
25 • If a report did not provide any direct information on number of deaths, no counts were  
26  
27 implied.  
28
- 29  
30 • If a number of deaths was reported in only one module in the ClinicalTrials.gov record or  
31  
32 the corresponding sections in the publication, i.e., either in participant flow, primary or  
33  
34 secondary outcome, or adverse events, this was determined to be the total number of  
35  
36 deaths.  
37
- 38  
39 • Otherwise, as a default, the highest unambiguous number of deaths in one category was  
40  
41 taken as the total number of deaths.  
42

43  
44 Appendix 3 shows an example of a record where the total number of deaths could not be  
45  
46 determined with certainty based on these rules. When the number of deaths could be  
47  
48 determined for both the ClinicalTrials.gov record and the corresponding publication following the  
49  
50 rules, we compared the numbers between the record and the publication. A pair was discordant  
51  
52 either when the total number of deaths was not the same, or when the ClinicalTrials.gov record  
53  
54 did not include any information on death numbers, yet the publication mentioned a presence or  
55  
56 absence of deaths. Discordant cases were reviewed in more detail. We extracted the  
57  
58 denominators for number of deaths from information on number started, randomized, or  
59  
60

1  
2  
3 analyzed. We further captured information on duration of follow-up and looked for possible  
4  
5 reasons for differences in number of deaths.  
6  
7  
8  
9  
10  
11  
12  
13  
14  
15  
16  
17  
18  
19  
20  
21  
22  
23  
24  
25  
26  
27  
28  
29  
30  
31  
32  
33  
34  
35  
36  
37  
38  
39  
40  
41  
42  
43  
44  
45  
46  
47  
48  
49  
50  
51  
52  
53  
54  
55  
56  
57  
58  
59  
60

For peer review only



## Results

### *Reporting of crude number of deaths in ClinicalTrials.gov results records*

In July 2011, there were 1981 records with results in ClinicalTrials.gov and 500 records were randomly chosen for further analysis (Appendix Figure 1). These included 123 records (25%) which reported a number of deaths in at least one module. Deaths were variably reported across the three modules of participant flow, primary or secondary outcome, and serious adverse events (Figure 1). Sixty-four percent of the records reported death numbers only in one of the modules, 32% in two modules and 4% in all of them. Approximately one fifth (27/123) of the records reported number of deaths only in the module for the serious adverse events, i.e. there were no deaths reported in the participant flow as a reason for not completing the trial. One fifth (24/123) reported deaths in both of these modules.

Out of the 500 records, we identified 97 with a primary or secondary outcome measure definition that implied ascertainment of deaths. Of the 97, there were 32 (33%) that reported a crude number of deaths in the primary or secondary outcome module, with or without a result for death in another metric for death, such as percentage, rate, risk estimate. The 65 records that did not report crude number of deaths in the primary or secondary outcome module nonetheless still reported number of deaths under participant flow or serious adverse events.

### *Reporting of information on death, determination of total number of deaths per arm and congruency in matched pairs*

We examined congruence of reporting of number of deaths across pairs of ClinicalTrials.gov records and corresponding trial publications. Figure 2 tabulates whether there was any information on number of deaths in a trial report, and if so, whether total number of deaths could be determined per arm following simple rules, and finally whether the total numbers per arm were concordant or discordant across pairs. We examined 27 pairs where the

1  
2  
3 ClinicalTrials.gov record contained some information on number of deaths and 27 pairs where  
4  
5 the ClinicalTrial.gov record did not contain any information on death numbers.  
6

7  
8 Of the 27 pairs with number of deaths reported in the ClinicalTrials.gov record, there  
9  
10 were 15 (55%) in which the total number of deaths per arm could be determined in both reports  
11  
12 (Figure 2, panel A). The number of deaths were concordant between the ClinicalTrials.gov  
13  
14 record and the publication in 10 pairs (37%), but discordant in five (19%). In the remaining 12  
15  
16 (44%), concordance could not be assessed because the total number of deaths per arm could  
17  
18 not be determined unambiguously for the record and the publication. The five discordant pairs  
19  
20 are shown in detail in Table 1.  
21

22  
23 In the 27 pairs where the ClinicalTrials.gov record did not contain any information on  
24  
25 death numbers, 14 (52%) pairs were concordant regarding the absence of information on  
26  
27 deaths, i.e. the trial publications also did not contain any death numbers (Figure 2, panel B).  
28  
29 However 13 (48%) publications contained information on number of deaths. In 9 studies (33%),  
30  
31 the published study affirmatively reported “no deaths” and in four studies, the published report  
32  
33 mentioned positive number of deaths (Figure 2, Panel B). These four cases are shown in Table  
34  
35 2. For example in Case 9, the ClinicalTrials.gov record did not contain any information on  
36  
37 number of deaths; but the publication reported one death under serious adverse events (Table  
38  
39 2).  
40  
41  
42  
43  
44

#### 45 *Review of cases with discordant counts*

46  
47 Tables 1 and 2 show the detailed review of the cases with discordant counts. For each  
48  
49 case, the crude number of deaths for each module or reporting location for the ClinicalTrials.gov  
50  
51 record and the corresponding publication are shown, as well as the total number of deaths per  
52  
53 arm that was determined following our operational rules. The summary contains comments and  
54  
55 interpretation of the discrepancies.  
56  
57  
58  
59  
60

1  
2  
3 In several cases, information on duration of follow-up or the time point of last  
4 assessment was not exact or varied across the reports. Comparison of number of deaths  
5 required reconciliation across reports with discordant numbers of arms (Cases 5 and 6) or  
6 discordant number of studies (Case 4). For example, in Case 5, the ClinicalTrials.gov record  
7 included two arms treated with different drug doses, while the publication reported results only  
8 for one of the arms. The number of deaths for this single arm was consistent across the  
9 ClinicalTrials.gov record and the publication. In the other cases with the same number of arms,  
10 the inference or certainty about the number of deaths within each arm differed. In addition to  
11 discordant counts, problems were lack of provision of crude death numbers even when death  
12 was an outcome of interest (Cases 1 and 3), imprecision in data entry (Case 4), reporting of  
13 deaths under serious adverse events without specification as to whether they were counted as  
14 part of the death outcome (Case 4) or the participant flow (Case 7). In most cases, the  
15 publication included a slightly higher crude number of deaths. Large discrepancies were noted  
16 in cases where the record did not report counts for an outcome that included death, while the  
17 report did (Cases 3 and 9).  
18  
19  
20  
21  
22  
23  
24  
25  
26  
27  
28  
29  
30  
31  
32  
33  
34  
35  
36  
37  
38  
39  
40  
41  
42  
43  
44  
45  
46  
47  
48  
49  
50  
51  
52  
53  
54  
55  
56  
57  
58  
59  
60

## Discussion

Our study highlights a failure of consistent and clear reporting of number of deaths in clinical trials. Only 25% of ClinicalTrials.gov results records provided some number of deaths, with great variation and overlap in the reporting across the three data modules for participant flow, primary or secondary outcomes, or serious adverse events. While we expected records reporting death as a serious adverse event to also list death as a reason for discontinuation from the trial in participant flow, a fifth of the records with death numbers reported deaths only under serious adverse events. Among ClinicalTrials.gov records with a definition for a primary or secondary outcome that implies ascertainment of death, only a third provided crude number of deaths in the data module for the primary or secondary outcome. This heterogeneous reporting and the uncertainty of whether deaths are reported in a redundant or exclusive manner across data modules, poses problems for reconciling deaths within a trial report.

Total number of deaths per arm could not always be determined unambiguously in the ClinicalTrials.gov results records or the corresponding publication. In the small sample where total deaths could be determined in both reports for the same trial, we identified examples where the number of deaths was discordant, highlighting lack of coherence and completeness. There were no clear patterns to explain the discrepancies. Finding a slightly higher crude number of deaths in publications than in ClinicalTrials.gov records suggests that number of deaths in the ClinicalTrials.gov records are not complete.

Our findings of haphazard reporting of deaths in clinical trials indicate a need for explicit expectations in reporting of all deaths regardless of whether they are considered to be a serious adverse event or not. We suggest that reporting formats for aggregate clinical trial results need to be amended to provide the following information: number of individuals who started per arm, number of deaths from any cause per arm and the time point of last ascertainment. This should prompt study investigators to sum up all deaths across participant flow, primary or secondary outcomes, and serious adverse events. Information on mean duration of follow-up is also

1  
2  
3 needed to allow calculation of rates. Given their prominent role supported by the legal  
4 regulations, clinical trials registries can spearhead uniform and consistent reporting of important  
5 trial outcomes, such as deaths. Similarly editors and sponsors must educate trialists to better  
6 meet the need for uniform reporting of all deaths.<sup>13;15</sup>  
7  
8  
9

10  
11 Our study has several limitations. We examined only a limited number of matched  
12 cases. Nevertheless, even these small samples demonstrate ambiguity within records and  
13 inconsistencies across reports of the same trial. Also, we used only data available in these  
14 reports to determine the total number of deaths per arm. It is possible that individual patient data  
15 available to the trial investigators would allow more studies to provide unambiguous number of  
16 deaths. However, this information is not publicly available and clinicians and policy makers rely  
17 on publicly accessible trial results reported in ClinicalTrials.gov records and in journal  
18 publications. Further, we only gave credit to number of deaths and not to alternate information  
19 on death, such as percents or survival analyses, as exact back calculations are not always  
20 possible. Finally, we followed operational rules to determine total deaths per arm within a report.  
21 These operational rules were not overly stringent and more rigid expectations would have  
22 resulted in fewer reports with the data amenable for detailed analysis.  
23  
24  
25  
26  
27  
28  
29  
30  
31  
32  
33  
34  
35  
36  
37

38 Our findings have to be viewed in context. Only 22% of studies report their results in  
39 ClinicalTrials.gov within one year of completion<sup>16</sup> and fewer than half of studies funded by the  
40 National Institutes of Health publish their results in a Medline indexed journal within 30 months  
41 of trial completion.<sup>17</sup> Thus, our matched pairs are drawn from a minority of trials that have been  
42 compliant with both expectations: publication of results in ClinicalTrials.gov and publication in a  
43 peer reviewed journal.  
44  
45  
46  
47  
48  
49  
50

51 Full reporting of all deaths enables more accurate assessment of risks and benefits  
52 associated with treatments. Assessment of patient safety relies on capturing signals, even when  
53 they are non-specific.<sup>18;19</sup> Small differences in numbers of death may bias results and distort  
54 estimates across studies. From an ethical perspective, it is desirable that trials ascertain and  
55  
56  
57  
58  
59  
60

1  
2  
3 report all deaths regardless of whether they appear to be related to study conduct or  
4  
5 intervention, are unforeseen, or non-specific. Even with a clear instructions and prompts for  
6  
7 trials to report deaths; however, there may be remaining uncertainty depending on the rigor of  
8  
9 ascertainment or surveillance and the selection of trial outcomes. Further, crude numbers are  
10  
11 not the only format for reporting deaths in a trial. Time to event reporting may be more  
12  
13 meaningful, but may introduce uncertainty about how censoring and deaths are handled. While  
14  
15 both approaches to presenting information on deaths may be necessary and complementary,  
16  
17 our study suggests that some improvement could be made with simple means of standardized  
18  
19 reporting formats.  
20  
21

22  
23 In summary, our study shows lack of clarity, consistency and agreement in reporting of  
24  
25 deaths in clinical trials. This highlights the need for unambiguous templates to standardize  
26  
27 reporting of total number of deaths per arm in ClinicalTrials.gov records and more stringent  
28  
29 reporting guidelines for peer reviewed publications.  
30  
31  
32  
33  
34  
35  
36  
37  
38  
39  
40  
41  
42  
43  
44  
45  
46  
47  
48  
49  
50  
51  
52  
53  
54  
55  
56  
57  
58  
59  
60

1  
2  
3 **Data Sharing Statement:** There is no additional available.  
4  
5  
6

7  
8 **Copyright:** The Corresponding Author has the right to grant on behalf of all authors and does  
9 grant on behalf of all authors, a worldwide license to the Publishers and its licensees in  
10 perpetuity, in all forms, formats and media (whether known now or created in the future), to i)  
11 publish, reproduce, distribute, display and store the Contribution, ii) translate the Contribution  
12 into other languages, create adaptations, reprints, include within collections and create  
13 summaries, extracts and/or, abstracts of the Contribution, iii) create any other derivative work(s)  
14 based on the Contribution, iv) to exploit all subsidiary rights in the Contribution, v) the inclusion  
15 of electronic links from the Contribution to third party material where-ever it may be located;  
16 and, vi) license any third party to do any or all of the above.  
17  
18  
19  
20  
21  
22  
23  
24  
25  
26  
27  
28

29 **Contributors:** Concept and design: AE, JL, KU; Interpretation of data: AE, JL, KU; Drafting  
30 article: AE, KU; Revision of article for important intellectual content: AE, JL, KU  
31  
32  
33  
34  
35

### 36 **Funding:**

37  
38 This project was funded under Contract No. HHS 290 2007-10055-I, entitled "Evidence-based  
39 Protocol for Reviewing ClinicalTrials.gov Results Database," from the Agency for Healthcare  
40 Research and Quality, U.S. Department of Health and Human Services. The authors of this  
41 report are responsible for its content. Statements in the report should not be construed as  
42 endorsement by the Agency for Healthcare Research and Quality or the U.S. Department of  
43 Health and Human Services.  
44  
45  
46  
47  
48  
49  
50

51  
52  
53 **Competing interests:** All authors have completed the ICMJE uniform disclosure form at  
54 [www.icmje.org/coi\\_disclosure.pdf](http://www.icmje.org/coi_disclosure.pdf) and declare that there are no conflicts of interest.  
55  
56  
57  
58  
59  
60

## Tables

Table 1. Cases with number of deaths in ClinicalTrials.gov record that are discordant with the corresponding publication

Table 2. Cases without any information on death numbers in ClinicalTrials.gov record but reports of number of deaths in the corresponding publication

## Figures

Figure 1. Reporting of number of deaths by data module in 123 ClinicalTrials.gov records

Figure 2. Consistency of death in matched pairs in (A) those with number of deaths in ClinicalTrials.gov and (B) those without any information on death numbers in ClinicalTrials.gov

## Appendices

Appendix Figure 1. Study Flow

Appendix 2. Examples of number of deaths reported in modules of ClinicalTrials.gov records

Appendix 3. Example of a ClinicalTrials.gov record with an indeterminate total number of deaths

Legend: In Module A, the participant flow shows 2 deaths per arm indicating a total of 4 deaths as a reason for non-completion of the trial. In Module B, results are reported for a secondary outcome entitled "Number of Participants With Overall Survival Events". The Measure Description suggests a survival analysis while the Measure Title and units show actual numbers. Since 188 of 745 participants in the TAC arm and 241 of 746 participants in the FAC arm were counted as alive in the survival analysis, 1062 individuals among 1491 participants were censored (557 vs. 505 per arm respectively). The data module for adverse events (not shown) did not provide additional information on death. Since this is a study of metastatic breast cancer, we assumed that the total number of deaths was greater than 4 as shown in the participant flow, but the actual number could not be determined with certainty.



## Reference List

- 1  
2  
3  
4  
5  
6  
7  
8  
9  
10  
11  
12  
13  
14  
15  
16  
17  
18  
19  
20  
21  
22  
23  
24  
25  
26  
27  
28  
29  
30  
31  
32  
33  
34  
35  
36  
37  
38  
39  
40  
41  
42  
43  
44  
45  
46  
47  
48  
49  
50  
51  
52  
53  
54  
55  
56  
57  
58  
59  
60
- (1) Chou R, Helfand M. Challenges in systematic reviews that assess treatment harms. *Ann Intern Med* 2005; 142(12 Pt 2):1090-1099.
  - (2) Ioannidis JP, Lau J. Completeness of safety reporting in randomized trials: an evaluation of 7 medical areas. *JAMA* 2001; 285(4):437-443.
  - (3) Food and Drug Administration. Code of Federal Regulations Title 21. 21 CFR 312.33(b)(3) - Annual Reports. 2012.  
Ref Type: Bill/Resolution
  - (4) Investigational new drug safety reporting requirements for human drug and biological products and safety reporting requirements for bioavailability and bioequivalence studies in humans. Final rule. *Fed Regist* 2010; 75(188):59935-59963.
  - (5) Sherman RB, Woodcock J, Norden J, Grandinetti C, Temple RJ. New FDA regulation to improve safety reporting in clinical trials. *N Engl J Med* 2011; 365(1):3-5.
  - (6) Food and Drug Administration. Code of Federal Regulations Title 21. 21 CFR 312.32(c)(1)(i)(C)-IND safety reporting. 2012.  
Ref Type: Bill/Resolution
  - (7) Zarin DA, Tse T, Williams RJ, Califf RM, Ide NC. The ClinicalTrials.gov results database-update and key issues. *N Engl J Med* 2011; 364(9):852-860.
  - (8) Food and Drug Administration Amendments Act. U.S. Public Law 110-85. 2012.  
Ref Type: Bill/Resolution
  - (9) Tse T, Williams RJ, Zarin DA. Reporting "basic results" in ClinicalTrials.gov. *Chest* 2009; 136(1):295-303.
  - (10) Food and Drug Administration Amendments Act. U.S. Public Law 110-95. 2007.  
Ref Type: Bill/Resolution
  - (11) ClinicalTrials.gov. ClinicalTrials.gov "Basic Results" Data Element Definitions. [http://prsinfo.clinicaltrials.gov/results\\_definitions.html#AdverseEvents](http://prsinfo.clinicaltrials.gov/results_definitions.html#AdverseEvents) . 2012. 6-26-2012.  
Ref Type: Online Source
  - (12) Cato A. Premarketing adverse drug experiences: data management procedures. Unexpected death occurring early in clinical trials. *Drug Inf J* 1987; 21(1):3-7.
  - (13) Schulz KF, Altman DG, Moher D. CONSORT 2010 statement: updated guidelines for reporting parallel group randomized trials. *Ann Intern Med* 2010; 152(11):726-732.
  - (14) Ioannidis JP, Evans SJ, Gotzsche PC, O'Neill RT, Altman DG, Schulz K et al. Better reporting of harms in randomized trials: an extension of the CONSORT statement. *Ann Intern Med* 2004; 141(10):781-788.
  - (15) Mansi BA, Clark J, David FS, Gesell TM, Glasser S, Gonzalez J et al. Ten recommendations for closing the credibility gap in reporting industry-sponsored clinical

1  
2  
3 research: a joint journal and pharmaceutical industry perspective. *Mayo Clin Proc* 2012;  
4 87(5):424-429.  
5

- 6  
7 (16) Prayle AP, Hurley MN, Smyth AR. Compliance with mandatory reporting of clinical trial  
8 results on ClinicalTrials.gov: cross sectional study. *BMJ* 2012; 344:d7373.  
9  
10 (17) Ross JS, Tse T, Zarin DA, Xu H, Zhou L, Krumholz HM. Publication of NIH funded trials  
11 registered in ClinicalTrials.gov: cross sectional analysis. *BMJ* 2012; 344:d7292.  
12  
13 (18) Drazen JM. COX-2 inhibitors--a lesson in unexpected problems. *N Engl J Med* 2005;  
14 352(11):1131-1132.  
15  
16 (19) Nissen SE, Wolski K. Rosiglitazone revisited: an updated meta-analysis of risk for  
17 myocardial infarction and cardiovascular mortality. *Arch Intern Med* 2010; 170(14):1191-  
18 1201.  
19  
20  
21  
22  
23  
24  
25  
26  
27  
28  
29  
30  
31  
32  
33  
34  
35  
36  
37  
38  
39  
40  
41  
42  
43  
44  
45  
46  
47  
48  
49  
50  
51  
52  
53  
54  
55  
56  
57  
58  
59  
60

## Haphazard Reporting of Deaths in Clinical Trials – a Review of Cases of ClinicalTrials.gov

### Records and Matched Publications: [a](#) cross-sectional study

Amy Earley BS research associate<sup>1</sup>, Joseph Lau MD professor of medicine<sup>1,2</sup>, Katrin Uhlig MD MS associate professor of medicine<sup>1,2,3</sup>

#### Author affiliations:

<sup>1</sup> Tufts Evidence-based Practice Center, Tufts Medical Center, Boston, MA 02111, US

<sup>2</sup> Tufts University School of Medicine, Boston, MA 02111, USA

<sup>3</sup> Division of Nephrology, Department of Medicine, Tufts Medical Center, Boston, MA 02111, USA

#### Corresponding author:

Katrin Uhlig MD, MS

Tufts Medical Center

800 Washington Street, #391

Boston, Massachusetts, 02111, USA

Email: [kuhlig@tuftsmedicalcenter.org](mailto:kuhlig@tuftsmedicalcenter.org)

#### Word Count:

Abstract: [264287](#)

Manuscript Text: [2935796](#)

## Abstract

**Context:** A participant death is a serious event in a clinical trial and needs to be unambiguously and publicly reported.

**Objective:** To examine: 1) how often and how numbers of deaths~~s-counts~~ are reported in ClinicalTrials.gov records; 2) how often total deaths can be determined per arm within a ClinicalTrials.gov results record and its corresponding publication; 3) how-whether counts may be discordant.

**Design:** Registry-based study of clinical trial results reporting

**Setting:** ClinicalTrials.gov results database searched in July 2011 and matched PubMed publications

**Selection criteria:** A random sample of ClinicalTrials.gov results records. Detailed review of records with a single corresponding publication.

**Main outcome measure:** ClinicalTrials.gov records reporting number of a deaths~~count~~ under participant flow, primary or secondary outcome, or serious adverse events. Consistency in reporting of number of death~~counts~~ between ClinicalTrials.gov records and corresponding publications.

**Results:** In 500 randomly selected ClinicalTrials.gov records, only 123 records (25%) reported some a number of for ~~deaths~~~~s-count~~. Reporting of deaths across data modules for participant flow, primary or secondary outcomes, and serious adverse events was variable. In a sample of 5427 pairs of ClinicalTrials.gov records with number of ~~deaths~~~~s-counts~~ and corresponding

1  
2  
3 publications, total deaths per arm could only be determined in 56% (15/27 pairs) but were  
4  
5 discordant in 19% (5/27). In 27 pairs of ClinicalTrials.gov records without any information on  
6  
7 number of deaths, 48% (13/27) were discordant since the publications reported absence of  
8  
9 deaths in 33% (9/27) and actual-positive death numberss in 15% (4/27).  
10  
11

12  
13  
14 **Conclusions:** Deaths counts are variably reported in eClinicalTrials.gov records. -and-a  
15  
16 reliable total number of deaths count per arm cannot always be determined with certainty and/or  
17  
18 can be discordant with number reported in corresponding trial publications. This highlights a  
19  
20 need for unambiguous and complete reporting of number of death counts in trial registries and  
21  
22 publications.  
23  
24  
25  
26  
27  
28  
29  
30  
31  
32  
33  
34  
35  
36  
37  
38  
39  
40  
41  
42  
43  
44  
45  
46  
47  
48  
49  
50  
51  
52  
53  
54  
55  
56  
57  
58  
59  
60

## Article Summary

### Article focus

- We hypothesized that the ~~discordant~~~~repant-reporting~~~~lack of clear~~ expectations for reporting all deaths in clinical trials give rise to discrepancies in number of deaths reported across reports of a trial.

### Key messages

- There is a lack of clarity, consistency and agreement in reporting of **all-cause death-counts** in clinical trials which highlights the need for unambiguous templates to standardize reporting of total number of deaths~~s-counts~~ per arm in ClinicalTrials.gov records and more ~~stringent~~~~explicit~~ reporting guidelines for peer reviewed publications.

### Strengths and limitations of this study

- Our findings indicate a need for ~~clarifying~~~~explicit~~ expectations ~~in-for~~ reporting of all deaths. ~~They~~ ~~and highlight differences in the legal standards for reporting of serious adverse events after trial completion in ClinicalTrials.gov and for expeditious real time reporting of serious adverse events in ongoing trials by the FDA~~.
- We suggest amendments to reporting formats such as: number of **individuals participants** who started per arm, total number of deaths from any cause per arm and the time point of last ascertainment to prompt study investigators to sum up all deaths across participant loss, primary or secondary outcomes, and serious adverse events.
- We examined only a limited number of matched cases. Nevertheless, ~~the discrepant findings~~ even ~~in~~ these small samples demonstrate ambiguity within

1  
2  
3 ~~records and a clear disconnect between reporting expectations and reporting~~  
4 ~~practices as illustrated by~~ inconsistencies across reports of the same trial.  
5  
6

- 7  
8 ~~• We used only data available in these reports to determine the total number of~~  
9 ~~deaths per arm. It is possible that individual patient data available to the trial~~  
10 ~~investigators would allow more studies to provide unambiguous death counts.~~  
11 ~~However, this information is not publicly available and clinicians and policy~~  
12 ~~makers rely on publicly accessible trial results reported in ClinicalTrials.gov~~  
13 ~~records and in journal publications.~~  
14  
15  
16  
17  
18  
19  
20  
21 • We used only data available in the publicly available reports and ~~We only gave~~  
22 credit to ~~counted actual number of~~ deaths ~~s counts~~ and not ~~to~~ alternate information  
23 on death, such as percents or survival analyses, as exact back calculations are  
24 not always possible.  
25  
26  
27  
28  
29  
30 • We followed operational rules to determine total deaths per arm within a report.  
31 These operational rules were not overly stringent and more rigid expectations  
32 would have resulted in fewer reports with the data amenable for detailed  
33 analysis.  
34  
35  
36  
37  
38  
39  
40  
41  
42  
43  
44  
45  
46  
47  
48  
49  
50  
51  
52  
53  
54  
55  
56  
57  
58  
59  
60

## Introduction

The death of a clinical trial subject is a serious event that needs to be publicly disclosed. ~~Inadequate-Incomplete~~ reporting of deaths may overemphasize health benefits when benefits and harms of medical interventions are summarized.<sup>1,2</sup> For unambiguous reporting, all deaths have to be reported for each trial arm and the absence of deaths must be explicitly stated if none were known to have occurred. ~~Trial registries such as ClinicalTrials.gov provide public records of trial results.<sup>3</sup> It is a Web-based trial registration of federally and privately funded trials.~~

Formal reporting expectations for public disclosure of deaths in clinical trials are complex. During a trial, the United States Food and Drug Administration (FDA) FDA expects a sponsor of an investigational new drug to submit annual reports that include a list of subjects who died during participation in the investigation, with the cause of death for each subject (ref IND annual reporting requirements 21 CFR 312.33(b)(3)). This means all deaths must be reported to the FDA, regardless of cause.

~~The FDA regulation on drug safety reporting requires sSponsors of investigational new drugs also need to promptly report to the FDA and trial investigators serious unexpected events if they are suspected adverse reactions, meaning that there is a "reasonable possibility" that the drug caused it<sup>8,9</sup>. -Further, the FDA regulations specify that the sponsor report "an aggregate analysis of specific events observed in a clinical trial ...that indicates those events occur more frequently in the drug treatment group than in a concurrent or historical control group(ref IND Safety report 21 CFR 312.32(C)(1)(i)(C))" Further, a sponsor must analyze in the aggregate events that are not interpretable as single cases. However, these must be reported only if there is an observed imbalance between the drug treatment group and a control groupsuggesting that the events may be caused by the drug.<sup>9</sup> Further, FDA regulations specify that the sponsor report "an aggregate analysis of specific events observed in a clinical trial that indicates those events occur more frequently in the drug treatment group than in a concurrent or historical control group."~~



1  
2  
3  
4  
5 ~~While there is no regulation specifically mandating the reporting of all deaths from any~~  
6 ~~cause in a clinical trial, a death may constitute a serious adverse event and is therefore subject~~  
7 ~~to the regulations on reporting of serious adverse events. However, it appears that there is~~  
8 ~~incongruence between legal reporting expectations for serious adverse events after trial~~  
9 ~~completion versus during trial conduct.~~

10  
11  
12  
13  
14  
15  
16 After trial completion, trial registries such as ClinicalTrials.gov provide Web-based public  
17 records of trial results of federally and privately funded trials.<sup>3</sup> Results reporting in  
18 ClinicalTrials.gov is mandated by the United States Food and Drug Administration (FDA)  
19 Amendments Act ~~mandates which requires~~ the reporting of summary results for phase II-IV  
20 interventional studies of drugs, biological products, and devices within 1 year of completing data  
21 collection for the prespecified primary outcome ~~in ClinicalTrials.gov<sup>3-5</sup>. The Act includes a~~  
22 ~~provision regarding the reporting of aggregate serious adverse events, thus mandating public~~  
23 ~~disclosure.~~ Based on this Act, the results data bank of the ClinicalTrials.gov registry shall  
24 include “a table of anticipated and unanticipated serious adverse events grouped by organ  
25 system with number and frequency in each arms of the trial”<sup>6</sup>. The ClinicalTrials.gov data  
26 element definitions define adverse events as “unfavorable changes in health ..., that occur in  
27 trial participants during the clinical trial or within a specified period following the trial.” and under  
28 serious adverse events include ~~“adverse events that result in death”<sup>7</sup>. This reporting of deaths~~  
29 ~~as a serious adverse event is currently the only requirement for reporting of deaths in~~  
30 ~~ClinicalTrials.gov and requires a judgment about the possibility of a causal association.~~  
31 ~~association. However, causality assessment may be a challenge. (ref Cato)~~

32  
33  
34  
35  
36  
37  
38  
39  
40  
41  
42  
43  
44  
45  
46  
47  
48  
49  
50  
51  
52  
53 The peer reviewed publication of clinical trials is guided by CONSORT. (ref Schulz). The  
54 main reporting CONSORT guideline does not specify a need to report all deaths; however,  
55 the subsequently published extension for reporting of adverse events states that “Authors  
56  
57  
58  
59  
60

1  
2  
3 should always report deaths in each study group during a trial, regardless of whether death is  
4 an end point and regardless of whether attribution to a specific cause is possible”(ref Ioannidis).  
5  
6  
7  
8  
9

10  
11 ~~In contrast to these reporting expectations of all deaths after trial completion,~~  
12 ~~investigators and sponsors of ongoing clinical trials have to report adverse events to respective~~  
13 ~~drug regulatory authorities. The FDA regulation on drug safety reporting requires sponsors of~~  
14 ~~investigational new drugs to promptly report to the FDA and investigators serious unexpected~~  
15 ~~events if they are suspected adverse reactions, meaning that there is a “reasonable possibility”~~  
16 ~~that the drug caused it<sup>8:9</sup>. Otherwise, adverse events are batched by the sponsor and submitted~~  
17 ~~later. This requires an adjudication of the event as serious or minor; expected or unexpected;~~  
18 ~~and study related, possibly study related, or not study related. Death is by definition a serious~~  
19 ~~event, but it is nonspecific as it may result from natural disease progression, lack of efficacy of~~  
20 ~~an intervention, harm from an intervention or a cause unrelated to a trial. This need for judgment~~  
21 ~~about the possibility of a causal association makes accounting and adjudication of deaths in~~  
22 ~~trials challenging<sup>10</sup>.~~  
23  
24  
25  
26  
27  
28  
29  
30  
31  
32  
33  
34  
35  
36  
37  
38  
39

40 We hypothesized that the ~~\_discrepant\_ incongruent complex~~ reporting expectations for  
41 death give rise to ~~discrepancies discordance~~ in deaths ~~reported documented~~ across reports of a  
42 trial. We first examined how ~~number of death counts~~ from any cause ~~were was~~ reported in  
43 ClinicalTrials.gov records. We then attempted to determine the total deaths per arm in a  
44 ClinicalTrials.gov results record and in the corresponding publication. Finally, we conducted a  
45 detailed review of cases with discrepancies in ~~crude death~~ numbers to identify possible  
46  
47  
48  
49  
50  
51  
52  
53  
54  
55  
56  
57  
58  
59  
60 explanations.

## Methods

The ClinicalTrials.gov team provided us with a database of results records indexed in ClinicalTrials.gov (search date July 12, 2011). The database contained all records of phase II, III, or IV interventional trials with results entered between September 9, 2009 and June 14, 2011. In 500 randomly selected records, we examined the record for reporting of any number of death-counts. This entailed review of three of the four scientific data modules, i.e. participant flow, primary and secondary outcomes, and serious adverse events, but not baseline characteristics. Appendix 1 shows screenshots for the three pertinent modules from a sample ClinicalTrials.gov record. We considered deaths-counts only when a zero or a positive number for death was reported in any module, i.e. we did not derive death-countsnumbers from information on deaths reported as percentages, rates, risks, or survival curves. In the 123 records that reporting a crude some number of death deaths-count, we examined in which module deaths were reported. Deaths from serious adverse events would presumably be a reason for not completing a trial and qualify to be listed as such in the participant flow module. We examined how many records reported number of death-count only in the serious adverse events module without reporting any deaths as a reason for discontinuation.

Among the 500 records, we also identified studies with an outcome measure description that implied ascertainment of death, including overall survival, time to mortality, all cause deaths, disease-specific death, composite outcomes including death and serious adverse events including deaths. In this subset, we examined how often actual numbers of death-counts were reported as part of the primary or secondary outcome module when the outcome suggested that number-of deaths were collected.

We then compared death reporting between ClinicalTrials.gov results records and corresponding publications. To select a sample of pairs, we used 2 criteria: 1) ClinicalTrials.gov

1  
2  
3 records had to provide only a single PubMed Identifier (PMID) matching a publication describing  
4 trial results to avoid the need for reconciliation across several publications, and 2) publications  
5 had to be electronically accessible through our library. Based on these two criteria, we retrieved  
6  
7  
8  
9  
10 ~~75-27 matching~~ publications matching of which 27 corresponded to the -ClinicalTrials.gov  
11 records that reported death numbers. We sampled another 27 pairs of publications and  
12  
13  
14 ClinicalTrials.gov records where the ~~ClinicalTrials.gov~~ record did not report death numbers.  
15

16 For each record or publication, we attempted to determine the total deaths per arm and  
17 the numbers randomized or analyzed per arm based on the data available in the record and  
18 publication, without contacting authors. This required assumptions when reconciling number of  
19  
20  
21 death ~~counts~~ across the three pertinent modules in the ClinicalTrials.gov record. For the  
22  
23  
24 publications, we searched the sections of the article corresponding to the modules. We used the  
25  
26  
27 following operational rules for decision-making:

- 28  
29 • If a report did not provide any direct information on number of death ~~counts~~, no counts  
30 were implied.  
31
- 32  
33 • If a number of death ~~counts~~ was reported in only one module in the ClinicalTrials.gov  
34 record or the corresponding sections in the publication, i.e., either in participant flow,  
35 primary or secondary outcome, or adverse events, this was determined to be the total  
36  
37  
38 number of death ~~count~~.  
39
- 40  
41 • Otherwise, as a default, the highest unambiguous number of deaths in one category was  
42 taken as the total number of death ~~count~~.  
43  
44  
45

46  
47  
48  
49 Appendix 23 shows an example of a record where the total number of death ~~count~~ could  
50  
51 not be determined with certainty based on these rules. When the number of death ~~counts~~ could  
52  
53 be determined for both the ClinicalTrials.gov record and the corresponding publication following  
54  
55 these rules, we compared these ~~death numbers counts~~ between the record and the publication.  
56  
57  
58 A pair was discordant either when the total number of deaths was not the same, or when the  
59  
60

1  
2  
3 [ClinicalTrials.gov](#) record did not include any information on death numbers, yet the publication  
4 [mentioned a presence or absence of deaths.](#) Discordant cases were reviewed in more detail.  
5  
6  
7 We extracted the denominators for [number of](#) death-counts from information on number started,  
8  
9 randomized, or analyzed. We further captured information on duration of follow-up and looked  
10  
11 for possible reasons for differences in [number of](#) death-counts.  
12  
13  
14  
15  
16  
17  
18  
19  
20  
21  
22  
23  
24  
25  
26  
27  
28  
29  
30  
31  
32  
33  
34  
35  
36  
37  
38  
39  
40  
41  
42  
43  
44  
45  
46  
47  
48  
49  
50  
51  
52  
53  
54  
55  
56  
57  
58  
59  
60

For peer review only

## Results

### *Reporting of crude number of death-counts in ClinicalTrials.gov results records*

In July 2011, there were 1981 records with results in ClinicalTrials.gov and 500 records were randomly chosen for further analysis (Appendix Figure 1). These included 123 records (25%) which reported a number of deaths-count in at least one module. Deaths were variably reported across the three modules of participant flow, primary or secondary outcome, and serious adverse events (Figure 1). Sixty-four percent of the records reported ~~crude~~ death numbers only in one of the modules, 32% in two modules and 4% in all of them. Approximately one fifth (27/123) of the records reported ~~crude~~ number of deaths-counts only in the module for the serious adverse events, i.e. there were no deaths reported in the participant flow as a reason for not completing the trial. One fifth (24/123) reported deaths in both of these modules.

Out of the 500 records, we identified 97 with a primary or secondary outcome measure definition that implied ascertainment of deaths. Of the 97, there were 32 (33%) that reported a crude number of deaths-count in the primary or secondary outcome module, with or without a result for death in another metric for death, such as percentage, rate, risk estimate.... The 65 records that did not report crude number of death-counts in the primary or secondary outcome module nonetheless still reported number of death-counts under participant flow or serious adverse events.

### *Reporting of information on death, determination of total number of death-counts per arm and congruency in matched pairs*

We examined congruence of reporting of number of deaths across pairs of ClinicalTrials.gov records and corresponding trial publications. Figure 2 tabulates whether there was any information on number of deaths in a trial report, and if so, whether total number of death-counts could be determined per arm following simple rules, and finally whether the total

1  
2  
3 counts numbers per arm were concordant or discordant across pairs. We examined 27 pairs  
4  
5 where the ClinicalTrials.gov record contained some information on number of deaths counts and  
6  
7 27 pairs where the ClinicalTrials.gov record did not contain any information on death numbers.  
8  
9

10  
11  
12 Of the 27 pairs with information on number of death counts reported in the  
13  
14 ClinicalTrials.gov record, there were 15 (55%) in which the total number of deaths count per arm  
15  
16 could be determined in both reports (Figure 2, panel A). The number of death counts were  
17  
18 concordant between the ClinicalTrials.gov record and the publication in 10 pairs (37%), but  
19  
20 discordant in five pairs (19%), while in the remaining 12 (44%), concordance could not be  
21  
22 assessed because the total number of deaths per arm could not be determined unambiguously  
23  
24 for the record and the publication. The five discordant pairs are shown in detail in Table 1.  
25  
26  
27

28  
29 In the 27 pairs where the ClinicalTrials.gov record did not contain any information on  
30  
31 death numbers, 14 (52%) pairs were concordant regarding the absence of information on  
32  
33 deaths, i.e. the trial publications also did not contain any information on death numbers (Figure  
34  
35 2, panel B). However 13 (48%) publications contained information on number of death counts.  
36  
37 In 9 studies (33%), the published study affirmatively reported “no deaths” and in four studies,  
38  
39 the published report mentioned positive number of death counts (Figure 2, Panel B). These four  
40  
41 cases are shown in Table 2. For example in Case 9, the ClinicalTrials.gov record did not contain  
42  
43 any information on number of deaths; but, the publication reported one death under serious  
44  
45 adverse events (Table 2).  
46  
47  
48  
49  
50

#### 51 *Review of cases with discrepant-discordant counts*

52  
53 Tables 1 and 2 show the detailed review of the cases with discrepant-discordant counts.  
54  
55 For each case, the crude number of death counts for each module or reporting location for the  
56  
57 ClinicalTrials.gov record and the corresponding publication are shown, as well as the total  
58  
59  
60

1  
2  
3 number of deaths per arm that was determined following our operational rules. The summary  
4 contains comments and interpretation of the discrepancies.  
5  
6  
7

8  
9  
10 In several cases, information on duration of follow-up or the time point of last  
11 assessment was not exact or varied across the reports. Comparison of number of death-counts  
12 required reconciliation across reports with discrepant-discordant numbers of arms (Cases 5 and  
13 6) or discrepant-discordant number of studies (Case 4). For example, in Case 5, the  
14 ClinicalTrials.gov record included two arms treated with different drug doses, while the  
15 publication reported results only for one of the arms. ~~Ultimately, t~~The number of death-counts for  
16 this one-single arm was consistent across the ClinicalTrials.gov record and the publication. In  
17 the other cases with the same number of arms, however, the inference or certainty about the  
18 number of deaths perwithin each arm differed. In addition to discrepant-discordant counts,  
19 problems were lack of provision of crude death numbers even when death was an outcome of  
20 interest (Cases 1 and 3), imprecision in data entry (Case 4), reporting of deaths under serious  
21 adverse events without specification as to whether they were counted as part of the death  
22 outcome (Case 4) or the participant flow (Case 7). In most cases, the publication included a  
23 slightly higher crude number of death-counts. Large discrepancies were noted in cases where  
24 the record did not report counts for an outcome that included death, while the report did (Cases  
25 3 and 9).  
26  
27  
28  
29  
30  
31  
32  
33  
34  
35  
36  
37  
38  
39  
40  
41  
42  
43  
44  
45  
46  
47  
48  
49  
50  
51  
52  
53  
54  
55  
56  
57  
58  
59  
60



## Discussion

Our study highlights a failure of consistent and clear reporting of number of death-counts in clinical trials. Only 25% of ClinicalTrials.gov results records provided some information on number of death-counts, with great variation and overlap in the reporting across the three data modules for participant lossflow, primary or secondary outcomes, or serious adverse events. While we expected records reporting death as a serious adverse event to also list death as a reason for discontinuation from the trial in participant flow, a fifth of the records with death numbers reported deaths only under serious adverse events. Among ClinicalTrials.gov records trials with a definition for a primary or secondary outcome that implies ascertainment of death, only a third of ClinicalTrials.gov records provided crude number of death-counts in the data module for the primary or secondary outcome. This heterogeneous reporting and the uncertainty of whether deaths are reported in a redundant or exclusive manner across data modules, poses problems for reconciling deaths within a trial report.

~~Following operational rules, t~~ Total counts-number of deaths per arm could not always be determined unambiguously in the ClinicalTrials.gov results records or the corresponding publication. In the small sample where total deaths could be determined in both reports for the same trial, we identified examples where the number of death-counts were-was discrepant/discordant, highlighting lack of coherence and completeness. There were no clear patterns to explain the discrepancies. Finding a slightly higher crude number of death-counts in publications than in ClinicalTrials.gov records suggests that number of death-counts in the ClinicalTrials.gov records are not complete. ~~This indicates a violation of the reporting expectations for ClinicalTrials.gov which includes death as a serious adverse event.~~

Our findings of haphazard reporting of deaths in clinical trials indicate a need for clarifying explicit expectations in reporting of all deaths and highlight differences in the legal

1  
2  
3 ~~standards for reporting of serious adverse events after trial completion<sup>6</sup> and expeditious real~~  
4 ~~time reporting of serious adverse events in ongoing trials, regardless of whether they are~~  
5 ~~considered to be a serious adverse event or not.~~ We suggest that reporting formats for  
6  
7  
8  
9  
10 aggregate clinical trial results need to be amended to provide the following information: number  
11  
12 of individuals who started per arm, number of deaths from any cause per arm and the time point  
13  
14 of last ascertainment. This should prompt study investigators to sum up all deaths across  
15  
16 participant ~~lossflow~~, primary or secondary outcomes, and serious adverse events. Information  
17  
18 on mean duration of follow-up is also needed to allow calculation of rates. Given their prominent  
19  
20 role supported by the legal regulations, clinical trials registries can spearhead uniform and  
21  
22 consistent reporting of important trial outcomes, such as deaths. Similarly editors and sponsors  
23  
24 must educate trialists to better meet the need for uniform reporting of ~~all deaths~~adverse events.

25  
26  
27 11-13  
28  
29  
30

31  
32 Our study has several limitations. We examined only a limited number of matched  
33  
34 cases. Nevertheless, ~~the discrepant findings even in~~ these small samples demonstrate  
35  
36 ~~ambiguity within records and -clear disconnect between reporting expectations and reporting~~  
37 ~~practices as illustrated by~~ inconsistencies across reports of the same trial. Also, we used only  
38  
39 data available in these reports to determine the total number of deaths per arm. It is possible  
40  
41 that individual patient data available to the trial investigators would allow more studies to provide  
42  
43 unambiguous ~~number of~~ death ~~counts~~. However, this information is not publicly available and  
44  
45 clinicians and policy makers rely on publicly accessible trial results reported in ClinicalTrials.gov  
46  
47 records and in journal publications. Further, we only gave credit to ~~number of~~ death ~~counts~~ and  
48  
49 not to alternate information on death, such as percents or survival analyses, as exact back  
50  
51 calculations are not always possible. Finally, we followed operational rules to determine total  
52  
53 deaths per arm within a report. These operational rules were not overly stringent and more rigid  
54  
55 expectations would have resulted in fewer reports with the data amenable for detailed analysis.  
56  
57  
58  
59  
60

1  
2  
3  
4  
5 Our findings have to be viewed in context. Only 22% of studies report their results in  
6  
7 ClinicalTrials.gov within one year of completion<sup>14</sup> and fewer than half of studies funded by the  
8  
9 National Institutes of Health publish their results in a Medline indexed journal within 30 months  
10  
11 of trial completion.<sup>15</sup> Thus, our matched pairs are drawn from a minority of trials that have been  
12  
13 compliant with both expectations: publication of results in ClinicalTrials.gov and publication in a  
14  
15 peer reviewed journal.  
16  
17

18  
19  
20 Full reporting of all deaths enables more accurate assessment of risks and benefits  
21  
22 associated with treatments. Assessment of patient safety relies on capturing signals, even when  
23  
24 they are non-specific.<sup>16;17</sup> [Small differences in numbers of death may bias results and distort](#)  
25  
26 [estimates across studies.](#) Thus, from an ethical perspective, it is desirable that trials ascertain  
27  
28 and report all deaths regardless of whether they appear to be related to study conduct or  
29  
30 intervention, are unforeseen, or non-specific. [Death reporting may never be complete or simple](#)  
31  
32 [given the challenges in ascertainment and adjudication.](#) However, Even with a clear instructions  
33  
34 and prompts for trials to report deaths; however, there may be [remaining](#) uncertainty depending  
35  
36 on the rigor of ascertainment or surveillance and the [choice selection](#) of trial outcomes. [Further,](#)  
37  
38 [Crude numbers are not the only format for reporting deaths in a trial.](#) Time to event reporting  
39  
40 may be more meaningful, but may introduce uncertainty about how censoring and deaths are  
41  
42 handled. [Thus While](#) both approaches to presenting information on deaths may be necessary  
43  
44 and complementary, ~~but~~ our study suggests that some improvement could be made with simple  
45  
46 means of standardized reporting formats.  
47  
48  
49  
50

51  
52  
53 In summary, our study shows lack of clarity, consistency and agreement in reporting of  
54  
55 ~~all cause death counts~~ in clinical trials. This highlights the need for unambiguous templates to  
56  
57  
58  
59  
60

1  
2  
3 | standardize reporting of total number of death-counts per arm in ClinicalTrials.gov records and  
4  
5  
6 more stringent reporting guidelines for peer reviewed publications.  
7  
8  
9  
10  
11  
12  
13  
14  
15  
16  
17  
18  
19  
20  
21  
22  
23  
24  
25  
26  
27  
28  
29  
30  
31  
32  
33  
34  
35  
36  
37  
38  
39  
40  
41  
42  
43  
44  
45  
46  
47  
48  
49  
50  
51  
52  
53  
54  
55  
56  
57  
58  
59  
60

For peer review only

1  
2  
3 **Data Sharing Statement:** There is no additional available.  
4  
5  
6

7  
8 **Copyright:** The Corresponding Author has the right to grant on behalf of all authors and does  
9 grant on behalf of all authors, a worldwide license to the Publishers and its licensees in  
10 perpetuity, in all forms, formats and media (whether known now or created in the future), to i)  
11 publish, reproduce, distribute, display and store the Contribution, ii) translate the Contribution  
12 into other languages, create adaptations, reprints, include within collections and create  
13 summaries, extracts and/or, abstracts of the Contribution, iii) create any other derivative work(s)  
14 based on the Contribution, iv) to exploit all subsidiary rights in the Contribution, v) the inclusion  
15 of electronic links from the Contribution to third party material where-ever it may be located;  
16 and, vi) license any third party to do any or all of the above.  
17  
18  
19  
20  
21  
22  
23  
24  
25  
26  
27  
28

29 **Contributors:** Concept and design: AE, JL, KU; Interpretation of data: AE, JL, KU; Drafting  
30 article: AE, KU; Revision of article for important intellectual content: AE, JL, KU  
31  
32  
33  
34  
35

### 36 **Funding:**

37  
38 This project was funded under Contract No. HHS 290 2007-10055-I, entitled "Evidence-based  
39 Protocol for Reviewing ClinicalTrials.gov Results Database," from the Agency for Healthcare  
40 Research and Quality, U.S. Department of Health and Human Services. The authors of this  
41 report are responsible for its content. Statements in the report should not be construed as  
42 endorsement by the Agency for Healthcare Research and Quality or the U.S. Department of  
43 Health and Human Services.  
44  
45  
46  
47  
48  
49  
50

51  
52  
53 **Competing interests:** All authors have completed the ICMJE uniform disclosure form at  
54 [www.icmje.org/coi\\_disclosure.pdf](http://www.icmje.org/coi_disclosure.pdf) and declare that there are no conflicts of interest.  
55  
56  
57  
58  
59  
60

## Tables

Table 1. Cases with number of death-~~counts~~ in ClinicalTrials.gov record that are ~~discrepant~~ discordant with the corresponding publication

Table 2. Cases without any information on death numbers in ClinicalTrials.gov record but reports of number of death-~~counts~~ in the corresponding publication

## Figures

Figure 1. Reporting of number of death-~~counts~~ by data module in 123 ClinicalTrials.gov records

Figure 2. Consistency of death in matched pairs in (A) those with number of death-~~counts~~ in ClinicalTrials.gov and (B) those without any information on death numbers in ClinicalTrials.gov

## Appendices

Appendix Figure 1. Study Flow

Appendix 2. Examples of number of death-~~counts~~ reported in modules of ClinicalTrials.gov records

Appendix 3. Example of a ClinicalTrials.gov record with an indeterminate total number of deaths count

Legend: In Module A, the number of deaths stated in the participant flow shows as 2 deaths per arm indicating meaning a total of 4 deaths as a reason for non-completion of the trial during the trial. In Module B, results are reported for a which is the secondary outcome entitled of "Number of Participants With Overall Survival Events", the Measure Description suggests a survival analysis while the Measure Title and units suggest show that this outcome reports the actual numbers of participants who survived. Assuming this to be the case, the number of deaths is not consistent with that in the participant flow. If Since 188 of 745 participants in the TAC arm and 241 of 746 participants in the FAC arm were counted as alive in the survival analysis survived, that would indicate a total of 1062 individuals deaths in among 1491 participants were censored or died (557 vs. 505 deaths per arm respectively). The data module for adverse events (not shown) did not provide additional information on deaths. Since this is a study of metastatic breast cancer, we assumed that the total number of deaths was

1  
2  
3  
4  
5  
6  
7  
8  
9  
10  
11  
12  
13  
14  
15  
16  
17  
18  
19  
20  
21  
22  
23  
24  
25  
26  
27  
28  
29  
30  
31  
32  
33  
34  
35  
36  
37  
38  
39  
40  
41  
42  
43  
44  
45  
46  
47  
48  
49  
50  
51  
52  
53  
54  
55  
56  
57  
58  
59  
60

greater than 4 as shown in the participant flow, but the actual number could not be determined with certainty. The number of assumptions and unclear reporting for death flag this record as one where we are unable to determine the total number of deaths with certainty.

For peer review only

## Reference List

- 1  
2  
3  
4  
5  
6  
7  
8  
9  
10  
11  
12  
13  
14  
15  
16  
17  
18  
19  
20  
21  
22  
23  
24  
25  
26  
27  
28  
29  
30  
31  
32  
33  
34  
35  
36  
37  
38  
39  
40  
41  
42  
43  
44  
45  
46  
47  
48  
49  
50  
51  
52  
53  
54  
55  
56  
57  
58  
59  
60
- (1) Chou R, Helfand M. Challenges in systematic reviews that assess treatment harms. *Ann Intern Med* 2005; 142:1090-1099.
- (2) Ioannidis JP, Lau J. Completeness of safety reporting in randomized trials: an evaluation of 7 medical areas. *JAMA* 2001; 285:437-443.
- (3) Zarin DA, Tse T, Williams RJ, et al. The ClinicalTrials.gov results database--update and key issues. *N Engl J Med* 2011; 364:852-860.
- (4) Tse T, Williams RJ, Zarin DA. Reporting "basic results" in ClinicalTrials.gov. *Chest* 2009; 136:295-303.
- (5) FDAAA. U.S. Public Law 110-85. <http://clinicaltrials.gov/ct2/invest> . 2012. Accessed: 6-26-2012.  
Ref Type: Online Source
- (6) Food and Drug Administration Amendments Act of 2007. Public Law 110-95. 2007.  
Ref Type: Bill/Resolution
- (7) ClinicalTrials.gov. ClinicalTrials.gov "Basic Results" Data Element Definitions. [http://prsinfo.clinicaltrials.gov/results\\_definitions.html#AdverseEvents](http://prsinfo.clinicaltrials.gov/results_definitions.html#AdverseEvents) . 2012. Accessed: 6-26-2012.  
Ref Type: Online Source
- (8) Investigational new drug safety reporting requirements for human drug and biological products and safety reporting requirements for bioavailability and bioequivalence studies in humans. Final rule. *Fed Regist* 2010; 75:59935-59963.
- (9) Sherman RB, Woodcock J, Norden J, et al. New FDA regulation to improve safety reporting in clinical trials. *N Engl J Med* 2011; 365:3-5.
- (10) Lauer MS, Blackstone EH, Young JB, et al. Cause of death in clinical research: time for a reassessment? *J Am Coll Cardiol* 1999; 34:618-620.
- (11) Schulz KF, Altman DG, Moher D. CONSORT 2010 statement: updated guidelines for reporting parallel group randomized trials. *Ann Intern Med* 2010; 152:726-732.
- (12) Ioannidis JP, Evans SJ, Gotzsche PC, et al. Better reporting of harms in randomized trials: an extension of the CONSORT statement. *Ann Intern Med* 2004; 141:781-788.
- (13) Mansi BA, Clark J, David FS, et al. Ten recommendations for closing the credibility gap in reporting industry-sponsored clinical research: a joint journal and pharmaceutical industry perspective. *Mayo Clin Proc* 2012; 87:424-429.
- (14) Prayle AP, Hurley MN, Smyth AR. Compliance with mandatory reporting of clinical trial results on ClinicalTrials.gov: cross sectional study. *BMJ* 2012; 344:d7373.
- (15) Ross JS, Tse T, Zarin DA, et al. Publication of NIH funded trials registered in ClinicalTrials.gov: cross sectional analysis. *BMJ* 2012; 344:d7292.



- (16) Drazen JM. COX-2 inhibitors--a lesson in unexpected problems. *N Engl J Med* 2005; 352:1131-1132.
- (17) Nissen SE, Wolski K. Rosiglitazone revisited: an updated meta-analysis of risk for myocardial infarction and cardiovascular mortality. *Arch Intern Med* 2010; 170:1191-1201.

For peer review only

1  
2  
3  
4  
5  
6  
7  
8  
9  
10  
11  
12  
13  
14  
15  
16  
17  
18  
19  
20  
21  
22  
23  
24  
25  
26  
27  
28  
29  
30  
31  
32  
33  
34  
35  
36  
37  
38  
39  
40  
41  
42  
43  
44  
45  
46  
47  
48  
49  
50  
51  
52  
53  
54  
55  
56  
57  
58  
59  
60

1  
2  
3 Dr. Trish Groves  
4 Editor in Chief  
5  
6 British Medical Journal Open  
7

Mr. Richard Sands  
Managing Editor  
British Medical Journal Open

8  
9  
10  
11  
12  
13  
14  
15  
16  
17  
18  
19  
20  
21  
22  
23  
24  
25  
26  
27  
28  
29  
30  
31  
32  
33  
34  
35  
36  
37  
38  
39  
40  
41  
42  
43  
44  
45  
46  
47  
48  
49  
50  
51  
52  
53  
54  
55  
56  
57  
58  
59  
60

October 16, 2012

Dear Dr. Groves and Mr. Sands,

Please see attached our revised manuscript titled: Haphazard Reporting of Deaths in Clinical Trials – a Review of ClinicalTrials.gov Records and corresponding Publications. We hope you will now find it satisfactory for publication.

We took into consideration all reviewer comments and made a number of edits. The most substantive edits are: 1) We addressed all reviewer comments that requested clarification, in particular to better explain our methods and definitions. 2) In the introduction, we provided more detail on the complex reporting requirements for deaths and serious adverse events from the FDA, ClinicalTrials.gov, and CONSORT statements. 3) In the appendix, we added an example of a ClinicalTrial.gov record where we were not able to determine the total number of deaths per arm. 4) We shortened the article summary. We attach two versions of the article, one with changes tracked and one with edits accepted. Please see our responses to the reviewer comments below.

As previously stated, this work is an empirical methods project, **thus no particular reporting standard or research checklist applies**. Also, we made the PMID and CT.gov identifiers for the pairs with discrepant findings available for the reviewers but **would prefer not to include them in a publication as we wish to highlight a generic problem rather than one related to specific trials**.

Sincerely,

Katrin Uhlig MD MS  
Tufts Evidence-based Practice Center  
Tufts Medical Center  
800 Washington Street, #391  
Boston, MA 02111  
Email: [kuhlig@tuftsmedicalcenter.org](mailto:kuhlig@tuftsmedicalcenter.org)

1  
2  
3 Reviewer(s)' Comments to Author:  
4

5 Reviewer: Andrew Prayle, Clinical Research Fellow, University of Nottingham.  
6

7  
8 Competing interests - I have previously published with data from ClinicalTrials.gov.  
9

10 This study highlights shortcoming on reporting of trial mortality results as shown through discrepancies  
11 between the number of deaths reported on the ClinicalTrials.gov website compared to the peer  
12 reviewed manuscript. This is an important aspect of clinical trials reporting – one would think it would  
13 be possible to report things as simple to define as mortality consistency across data sources about a  
14 trial.  
15

16 The methods used appear appropriate. However, it isn't fully clear to me why the authors did not also  
17 search for a publication themselves when one wasn't given on ClinicalTrials.gov. Our group has found  
18 that the 'publications' section of the ClinicalTrials.gov record frequently does not give citation details  
19 when in fact a paper has been published. This could possibly have increased the sample size, and made  
20 the findings more robust.  
21

22  
23 Response: We asked the ClinicalTrials.gov team to run a search for us using the available information.  
24 Also our intention was not to provide estimates of uncertainty. Rather to demonstrate a disconnect  
25 between reporting expectations and real-life practices.  
26

27  
28 Having read and re-read the methods section regarding how the authors determining the total death  
29 count, I am still not sure exactly how some records came to have a total death count assigned and some  
30 not. Perhaps an example could be given in the appendix of a record where the total death count could  
31 not be determined?  
32

33 Response: Please see new Appendix 3.  
34

35 Overall, the number of trials in the main analysis (54) is low. Have the authors done everything they can  
36 to maximise the number of included trials? I think that as the authors have essentially taken a sample  
37 from a population of larger studies, some estimate of certainty should be used in the statistics, such as  
38 95% confidence intervals.  
39

40  
41 Response: Our study highlights the issues resulting from lack of unequivocal reporting guidelines for  
42 reporting of deaths in clinical trial reports. We started out with 500 records but had attrition of records  
43 due to the lack of clarity in reporting leaving a smaller number of records eligible for detailed analysis.  
44 We, therefore, did not want to provide estimates of certainty for the frequency of the problem. Yet, the  
45 discrepant findings even in these small samples demonstrate a clear disconnect between reporting  
46 expectations and reporting practices.  
47

48  
49 Something odd has happened in the denominator of Table 2, Case 6, Arm 1, Publication column – it  
50 drops from 2563 to 1262 – is this a typographical error?  
51

52  
53 Response: We have corrected this error. Thank you.  
54

55 Are the authors planning to put the dataset into a public repository?  
56  
57  
58  
59  
60

1  
2  
3 Response: We will leave this to the discretion of the editor considering the pros and cons of an online  
4 appendix identifying records by their NCT numbers.  
5  
6

7 I think that this paper raises an important issue with the reporting of trials. However, the main  
8 limitations are the sample size (which may not be able to be increased further), and difficulty in deciding  
9 how the authors had decided when they could not determine a total death count.  
10

11 Reviewer: Peter C Gøtzsche  
12 The Nordic Cochrane Centre  
13 No competing interests  
14  
15

16 I think there is something interesting in this paper that we can learn from, but it needs to be written  
17 much better and in a way that allows us to understand whether the problems are major or minor  
18 without consulting the tables. It is really difficult to follow the flow of information in this paper, and the  
19 language is also difficult and sometimes inappropriate. I feel the senior author should have contributed  
20 more, as he is capable of writing far better than in this manuscript.  
21  
22

23 Abstract  
24

25 Line 17: please write "whether" counts may be discordant (not "how" as you don't know whether you  
26 will find any and therefore cannot say how).  
27

28 Response: We have revised the Abstract accordingly.  
29  
30

31 I have not seen the term "death counts" before and it feels pretty odd, like the US Republications' false  
32 allegations of government "death panels", please consider using another term, e.g. number of deaths,  
33 which is how we describe this.  
34

35 Response: Thank you. We have changed "death counts" to "number of deaths" or "death numbers"  
36 throughout.  
37  
38

39 Please describe how many pairs you sampled right from the start.  
40

41 Response: We have made the suggested edits to the Results section of the Abstract.  
42  
43

44 I do not understand how there can be pairs in the database, as a pair comes from an entry in the  
45 database and a published report, furthermore, if there was no information on deaths, how can then the  
46 information be discordant, particularly since some publications reported absence of death just as in the  
47 registry. This is too confusingly written.  
48

49 Response: We specified that 'without information on deaths' means "without any information on  
50 number of deaths", i.e. death or mortality were not mentioned in the CT.gov trial record. There was  
51 discordance when the publication mentioned that there were no deaths (number of deaths = 0), or that  
52 there was some death(s). We included a definition of discordance in the methods. See additional line in  
53 the last paragraph on page 9.  
54  
55  
56  
57  
58  
59  
60

1  
2  
3 Under Conclusion we hear about death count per arm, which was not what we heard about in Results,  
4 there must be consistency.  
5

6  
7 Response: Thank you but we have mentioned “total deaths per arm” in the Results section.  
8

9 P4, line 8: “the discrepant reporting expectations for death,” confusing construct, please revise.  
10

11 Response: Please see the revisions to the Article focus.  
12

13  
14 Line 14: we now hear about all cause death, which is commonly called all cause mortality, have not  
15 heard about this before, only death counts. You need to be consistent.  
16

17 Response: we have revised to simply “deaths”.  
18

19  
20 Line 27-34: not clear, use much simpler language so that we can follow your thinking.  
21

22 Response: Please see revisions to this first bullet.  
23

24  
25 Line 52: I cannot recall you have defined what you mean by reporting expectations?  
26

27 Response: The reporting expectations are those by the FDA, ClinicalTrials.gov, and CONSORT.  
28

29  
30 There is far too much in the Article Summary, page 4, and it continues on p 5, please abbreviate  
31 considerably. The first limitation on p 5 is not really a limitation, and not relevant for the Summary; it  
32 can be mentioned in the Discussion.  
33

34 Response: We deleted the first limitation on page 5.  
35

36  
37 Several places: I do not like calling people or participants for subjects or individuals, seems a bit  
38 denigrating to me.  
39

40 Response: We revised accordingly.  
41

42  
43 P6 line 14: the idea of explicitly stating even if no deaths occurred is a good one although it may seem  
44 over the top in many cases, e.g. in a small migraine trial. But we so often wonder whether no deaths  
45 occurred when nothing is mentioned about this that I believe it would be better if all papers involving  
46 patients needed to say that no one died if that is the case.  
47

48 Response: Thank you. We agree.  
49

50  
51 Line 21: I am highly surprised that there are no regulations mandating the reporting of all deaths in a  
52 trial, I would have expected there were, at least for drug trials. Are you absolutely sure about this? In  
53 your text below you say that death is a serious adverse event and that it therefore must always be  
54 reported in drug trials. This appears inconsistent.  
55

56  
57 P7: again, I seriously doubt that if a drug company does not consider a death related to their drug they  
58 are not required to report all deaths to FDA.  
59  
60

1  
2  
3 Response (to the 2 comments above): We appreciate your query. We contacted the FDA and obtained  
4 additional information on regulations which we have now incorporated into the third paragraph of the  
5 introduction.  
6  
7

8 P7: I was really amused to read that “deaths from serious adverse events would presumably be a reason  
9 for not completing a trial.” I am pretty sure that dead patients cannot complete a trial! I am not really  
10 sure what the idea is that is described in lines 32-34, does it matter that deaths are only reported in the  
11 serious adverse events section, and not as a reason for discontinuation?  
12

13 Response: A death is not always a reason for non-completion, (e.g. when death is an outcome, or in  
14 survival analyses where deaths may be censored). Regardless, we believe a death should at minimum be  
15 accounted for in the participant flow, if not also in results or adverse events.  
16  
17

18 P1, line 36: what is “a result for death in another metric?” Metric has to do with measuring, e.g. kg, and  
19 a death is a death so I think your use of terms is not optimal.  
20

21 Response: See additional examples in the second paragraph of the Results.  
22  
23

24 Line 58: I have forgotten whether the 27 pairs were randomly selected from all the pairs, I therefore  
25 went back to the top of P9 where I could see that you selected 75 matching publications of which 27  
26 corresponded to database records of reported deaths. At this point, it is not exactly clear to me how the  
27 study was done. It may be my fault, but I am usually able to understand what I read and I am now a bit  
28 confused about the methods.  
29  
30

31 Response: Please see revisions to the third paragraph of the Methods.  
32  
33

34 P11, lines 10-20: I wonder why concordance could not be assessed in 12 of the 27 pairs when they were  
35 carefully selected in order to have number of deaths per arm for both trial database and publication.  
36

37 Response: The 27 records were selected because they contained some number for deaths in at least one  
38 data module. However, in 12 pairs we could not compare the counts, because either the record or the  
39 publication did not allow unambiguous determination of the total number of deaths per arm.  
40

41 I also miss some information about what was different, e.g. was it one or two deaths out of many or  
42 what?  
43  
44

45 Response: Please see table 2.  
46  
47

48 Lines 25-40: I would not call it discordant when the database does not say anything about deaths and  
49 the publication says that there were no deaths.  
50

51 Response: We chose to count this as discordant given the difference in certainty about death counts  
52 between absence of any information and confirmation of number of deaths equal to zero.  
53  
54

55 P12, line 14: so, when treatment arms were missing, did you call this concordant or discordant? I  
56 suggest that you focus on the really important issues, e.g. P14, line 31 to 36, it is very serious when it is  
57 not possible to judge how many died in a trial in the two treatment arms because of ambiguity.  
58  
59  
60

1  
2  
3 Response: We agree that this is an important finding. We stated this as the first sentence of the second  
4 paragraph in the discussion.  
5

6  
7 I also suggest the authors write something about that just a couple of deaths may bias the trial  
8 considerably and if it happens in several trials, we can get it very wrong.  
9

10 Response: See addition to the sixth paragraph in the Discussion.  
11

12 A good case in point is not about death but about the three missing cases of myocardial infarction in the  
13 infamous Vigor trial published in NEJM in 2000. These myocardial infarctions were deleted very shortly  
14 before final submission of the manuscript and it changed the result from significant harm to no  
15 significant difference. That fraud cost the lives of thousands of patients.  
16

17  
18 Response: Thank you. We cited the editorial by Dr Dazen on this case study. See ref 16.  
19

20 P15, line 23: please be careful with your choice of words, "death reporting may never be complete or  
21 simple given the challenges in ascertainment and adjudication."  
22

23  
24 Response: We deleted this sentence.  
25

26 I always favour total number of deaths whatever the cause, which I suggest you also write about here  
27 as we know that assessment of cause death can be biased, sometimes to a considerable degree. So do  
28 not mix up total number of deaths, which you describe somewhere in your paper and cause specific  
29 mortality.  
30

31  
32 Response: We agree. This is stated in the new sentence added to the sixth paragraph of the Discussion.  
33

34 P15, line 45: you say here "In summary, our study shows lack of clarity...." Forgive me for saying this,  
35 but this is exactly the problem with your study, that the way it has been written up is not sufficiently  
36 clear (although this was not what you meant in this sentence of course).  
37

38  
39 Response: We hope it is clearer now. Thank you for your comments.  
40

41 One of your references is to the paper about better reporting of harms according to CONSORT. I  
42 therefore wonder why you do not quote this paper specifically, as it says under recommendation 6 that  
43 authors should always report deaths in each study group during a trial, regardless of whether death is an  
44 endpoint and regardless of whether attributions to a specific cause is possible. I believe you should  
45 quote this.  
46

47  
48 Response: Thank you for this comment. We have included this reference in the introduction. see  
49 revision.  
50

**Table 1: Cases with number of deaths in ClinicalTrials.gov record that are discordant with the corresponding publication**

| Population                 | Was death a specified outcome? <sup>1</sup> , Define                                                                                                                                                                                                                                                                                                                                                                                                                                                                                                                                                                                                       | Reporting module or location | ClinicalTrials.gov record                                              |                    | Publication                                                                     |         |
|----------------------------|------------------------------------------------------------------------------------------------------------------------------------------------------------------------------------------------------------------------------------------------------------------------------------------------------------------------------------------------------------------------------------------------------------------------------------------------------------------------------------------------------------------------------------------------------------------------------------------------------------------------------------------------------------|------------------------------|------------------------------------------------------------------------|--------------------|---------------------------------------------------------------------------------|---------|
|                            |                                                                                                                                                                                                                                                                                                                                                                                                                                                                                                                                                                                                                                                            |                              | Deaths/Randomized                                                      |                    | Deaths/Randomized                                                               |         |
|                            |                                                                                                                                                                                                                                                                                                                                                                                                                                                                                                                                                                                                                                                            |                              | Arm 1                                                                  | Arm 2              | Arm 1                                                                           | Arm 2   |
| <b>Case 1</b>              |                                                                                                                                                                                                                                                                                                                                                                                                                                                                                                                                                                                                                                                            |                              |                                                                        |                    |                                                                                 |         |
| Lung cancer                | Yes<br>Survival is a secondary outcome                                                                                                                                                                                                                                                                                                                                                                                                                                                                                                                                                                                                                     |                              | Follow up: While on study drug + 30 d after last dose (estimated 4 mo) |                    | Follow up: From random assignment until first day of progression or until death |         |
|                            |                                                                                                                                                                                                                                                                                                                                                                                                                                                                                                                                                                                                                                                            | Flow                         | /52                                                                    | -/51               | 4/52                                                                            | 2/51    |
|                            |                                                                                                                                                                                                                                                                                                                                                                                                                                                                                                                                                                                                                                                            | Outcome                      | -/52                                                                   | -/51               | --                                                                              | --      |
|                            |                                                                                                                                                                                                                                                                                                                                                                                                                                                                                                                                                                                                                                                            | SAE                          | 1/52                                                                   | 0/51               | 1/52                                                                            | 2/51    |
|                            | <b>Total</b>                                                                                                                                                                                                                                                                                                                                                                                                                                                                                                                                                                                                                                               | >1/52                        | >0/51                                                                  | >4/52              | >2/51                                                                           |         |
| <b>Summary</b>             | Both CT.gov record and the publication reported hazards ratios for survival and mean survival in months, but not the number of deaths for the outcome. Both reported deaths under serious adverse events, but counts differed between record and report. In addition the publication reported deaths in the flow diagram, while the record did not. The total number of deaths is discrepant between record and publication; however, neither it likely to represent the total number of deaths that occurred during the study.                                                                                                                            |                              |                                                                        |                    |                                                                                 |         |
| <b>Case 2</b>              |                                                                                                                                                                                                                                                                                                                                                                                                                                                                                                                                                                                                                                                            |                              |                                                                        |                    |                                                                                 |         |
| Multiple myeloma           | No                                                                                                                                                                                                                                                                                                                                                                                                                                                                                                                                                                                                                                                         |                              | Follow up: Up to 18 mo                                                 |                    | Follow up: Enrolled 2/06-12/06, analysis through 8/2007                         |         |
|                            |                                                                                                                                                                                                                                                                                                                                                                                                                                                                                                                                                                                                                                                            | Flow                         | 1/53                                                                   | 1/43               | 1/53                                                                            | 1/43    |
|                            |                                                                                                                                                                                                                                                                                                                                                                                                                                                                                                                                                                                                                                                            | Outcome                      | -/53                                                                   | -/41               | --                                                                              | --      |
|                            |                                                                                                                                                                                                                                                                                                                                                                                                                                                                                                                                                                                                                                                            | SAE                          | -/53                                                                   | -/42               | 4/53                                                                            | 1/42    |
|                            | <b>Total</b>                                                                                                                                                                                                                                                                                                                                                                                                                                                                                                                                                                                                                                               | 1/53                         | 1/43                                                                   | 4/53               | 1/43                                                                            |         |
| <b>Summary</b>             | Both CT.gov record and publication reported 1 death per arm in the participant flow. The total number of deaths is discrepant between record and publication, however, since the publication also reported 5 deaths under SAE.                                                                                                                                                                                                                                                                                                                                                                                                                             |                              |                                                                        |                    |                                                                                 |         |
| <b>Case 3</b>              |                                                                                                                                                                                                                                                                                                                                                                                                                                                                                                                                                                                                                                                            |                              |                                                                        |                    |                                                                                 |         |
| Refractory prostate cancer | Yes<br>Survival is the primary outcome                                                                                                                                                                                                                                                                                                                                                                                                                                                                                                                                                                                                                     |                              | Follow up: Analyzed through 9/2009                                     |                    | Follow up: Analyzed through 9/2009                                              |         |
|                            |                                                                                                                                                                                                                                                                                                                                                                                                                                                                                                                                                                                                                                                            | Flow                         | -/377                                                                  | -/378              | -/377                                                                           | -/378   |
|                            |                                                                                                                                                                                                                                                                                                                                                                                                                                                                                                                                                                                                                                                            | Outcome                      | -/377                                                                  | -/378              | 279/377                                                                         | 234/378 |
|                            |                                                                                                                                                                                                                                                                                                                                                                                                                                                                                                                                                                                                                                                            | SAE                          | 0/371 sudden death                                                     | 1/371 sudden death | 275/371                                                                         | 227/371 |
|                            | <b>Total</b>                                                                                                                                                                                                                                                                                                                                                                                                                                                                                                                                                                                                                                               | >0/377                       | >1/371                                                                 | 279/377            | 234/378                                                                         |         |
| <b>Summary</b>             | The CT.gov record reported hazards ratios for survival as well as survival in months, but not the total number of deaths per arm for this outcome. The publication reported a large number of deaths per arms for the outcome of survival (as) and also a large number of deaths under SAE. The numerators and denominators differed slightly based on intention to treat analyses or per protocol analyses. The CT.gov record reported only one death under SAE; although based on the survival analysis, it appeared likely that the total number of deaths in the study was higher. The total number of deaths is discrepant between record and report. |                              |                                                                        |                    |                                                                                 |         |
| <b>Case 4</b>              |                                                                                                                                                                                                                                                                                                                                                                                                                                                                                                                                                                                                                                                            |                              |                                                                        |                    |                                                                                 |         |
| Chronic Obstructive        | Yes<br>Death is a secondary                                                                                                                                                                                                                                                                                                                                                                                                                                                                                                                                                                                                                                |                              | Follow up: 52 wk                                                       |                    | Follow up: 52 wk                                                                |         |
|                            |                                                                                                                                                                                                                                                                                                                                                                                                                                                                                                                                                                                                                                                            | Flow                         | -/772                                                                  | -/796              | -/772                                                                           | -/796   |
|                            | Outcome                                                                                                                                                                                                                                                                                                                                                                                                                                                                                                                                                                                                                                                    | -/25                         | -/25                                                                   | 25/772             | 25/796                                                                          |         |

<sup>1</sup> In the ClinicalTrials.gov record



|                   |                                                                                                                                                                                                                                                                                                                                                                                                                                                                                                                                                                                                                                                                               |                                                             |                                    |                                    |                                       |        |
|-------------------|-------------------------------------------------------------------------------------------------------------------------------------------------------------------------------------------------------------------------------------------------------------------------------------------------------------------------------------------------------------------------------------------------------------------------------------------------------------------------------------------------------------------------------------------------------------------------------------------------------------------------------------------------------------------------------|-------------------------------------------------------------|------------------------------------|------------------------------------|---------------------------------------|--------|
| Pulmonary Disease | outcome                                                                                                                                                                                                                                                                                                                                                                                                                                                                                                                                                                                                                                                                       | SAE                                                         | 1/778 sudden death;<br>0/778 death | 3/790 sudden death;<br>2/790 death | -/778                                 | -/790  |
|                   |                                                                                                                                                                                                                                                                                                                                                                                                                                                                                                                                                                                                                                                                               | <b>Total</b>                                                | 25/772                             | 25/796                             | 25/772                                | 25/796 |
| <b>Summary</b>    | The CT.gov record reported 25 per arm as number analyzed in the outcome module and defined the number analyzed as the number died. Further, the CT.gov record reports deaths under SAE using two different death definitions ('sudden death' and 'death'), while the publication does not report any. Assuming that the deaths reported under SAE in the record are included in those reported for the outcome of death, the total number of deaths is consistent across record and publication. The publication describes 2 trials of similar design with two separate NCT number, but only the results corresponding to the trial in the index CT.gov record were compared. |                                                             |                                    |                                    |                                       |        |
| <b>Case 5</b>     |                                                                                                                                                                                                                                                                                                                                                                                                                                                                                                                                                                                                                                                                               |                                                             |                                    |                                    |                                       |        |
| Prostate cancer   | Yes<br>Death is a<br>secondary<br>outcome                                                                                                                                                                                                                                                                                                                                                                                                                                                                                                                                                                                                                                     | Follow up: From start of therapy up to 30 d after last dose |                                    |                                    | Follow up: Duration of therapy + 30 d |        |
|                   |                                                                                                                                                                                                                                                                                                                                                                                                                                                                                                                                                                                                                                                                               | Flow                                                        | -/48                               | -/47                               | --                                    | -/47   |
|                   |                                                                                                                                                                                                                                                                                                                                                                                                                                                                                                                                                                                                                                                                               | Outcome                                                     | 2/48                               | 2/47                               | --                                    | -/47   |
|                   |                                                                                                                                                                                                                                                                                                                                                                                                                                                                                                                                                                                                                                                                               | SAE                                                         | -/95                               |                                    | --                                    | 2/47   |
|                   |                                                                                                                                                                                                                                                                                                                                                                                                                                                                                                                                                                                                                                                                               | <b>Total</b>                                                | 2/48                               | 2/47                               | --                                    | 2/47   |
| <b>Summary</b>    | The CT.gov record reported results for 2 arms. The publication presents only results for Arm 2. The CT.gov report shows 2 deaths in the outcome module, but none under SAE. The publication shows 2 deaths under SAE. The number of deaths reported for this arm was consistent between record and publication.                                                                                                                                                                                                                                                                                                                                                               |                                                             |                                    |                                    |                                       |        |

Data collection in ClinicalTrials.gov on Feb 14 2012

Abbreviations: CT.gov, ClinicalTrials.gov; D/C, discontinuation; NCT, National Clinical Trial (number); SAE, serious adverse events; -- (dash), not reported;

**Table 2. Cases without any information on death numbers in ClinicalTrials.gov record but reports of number of deaths in the corresponding publication**

| Population                    | Was death a specified outcome?, Define                                                                                                                                                                                           | Reporting module or location | ClinicalTrials.gov record           |       |        |       | Publication                                                                     |         |        |  |
|-------------------------------|----------------------------------------------------------------------------------------------------------------------------------------------------------------------------------------------------------------------------------|------------------------------|-------------------------------------|-------|--------|-------|---------------------------------------------------------------------------------|---------|--------|--|
|                               |                                                                                                                                                                                                                                  |                              | Deaths/Randomized                   |       |        |       | Deaths/Randomized                                                               |         |        |  |
|                               |                                                                                                                                                                                                                                  |                              | Arm 1                               |       | Arm 2  |       | Arm 1                                                                           |         | Arm 2  |  |
| <b>Case 6</b>                 |                                                                                                                                                                                                                                  |                              |                                     |       |        |       |                                                                                 |         |        |  |
| Influenza vaccine in elderly  | No                                                                                                                                                                                                                               |                              | Follow up: 6 mo                     |       |        |       | Follow up: 6 mo                                                                 |         |        |  |
|                               |                                                                                                                                                                                                                                  |                              | Flow                                | -/857 | -/848  | -/870 | -/1262                                                                          | -/2575  | -/1262 |  |
|                               |                                                                                                                                                                                                                                  |                              | Outcome                             | --    | --     | --    | --                                                                              | --      | --     |  |
|                               |                                                                                                                                                                                                                                  |                              | SAE                                 | -/855 | -/848  | -/870 | -/1260                                                                          | 16/2573 | 7/1260 |  |
| <b>Total</b>                  | -/2575                                                                                                                                                                                                                           |                              |                                     |       | -/2575 |       | 7/1262                                                                          |         |        |  |
| <b>Summary</b>                | The CT.gov record did not report deaths counts across 4 arms. The publication described 23 deaths under SAE for 2 arms, collapsing arms 1-3 into one.                                                                            |                              |                                     |       |        |       |                                                                                 |         |        |  |
| <b>Case 7</b>                 |                                                                                                                                                                                                                                  |                              |                                     |       |        |       |                                                                                 |         |        |  |
| Amyotrophic lateral sclerosis | No                                                                                                                                                                                                                               |                              | Follow up: 9 mo                     |       |        |       | Follow up: 10 mo                                                                |         |        |  |
|                               |                                                                                                                                                                                                                                  |                              | Flow                                | -/75  | -/75   | -/75  | 3/75                                                                            | 5/75    |        |  |
|                               |                                                                                                                                                                                                                                  |                              | Outcome                             | -/75  | -/75   | -/75  | --                                                                              | --      |        |  |
|                               |                                                                                                                                                                                                                                  |                              | SAE                                 | -/75  | -/75   | -/75  | 3/75                                                                            | 5/75    |        |  |
| <b>Total</b>                  | -/75                                                                                                                                                                                                                             |                              | -/75                                |       | 3/75   |       | 5/75                                                                            |         |        |  |
| <b>Summary</b>                | The CT.gov record did not report death counts. The publication describes 8 deaths under participant flow as well as under SAE, which are presumably the same.                                                                    |                              |                                     |       |        |       |                                                                                 |         |        |  |
| <b>Case 8</b>                 |                                                                                                                                                                                                                                  |                              |                                     |       |        |       |                                                                                 |         |        |  |
| Diabetes Mellitus Type 2      | No                                                                                                                                                                                                                               |                              | Follow up: 26 wk                    |       |        |       | Follow up: 26 wk                                                                |         |        |  |
|                               |                                                                                                                                                                                                                                  |                              | Flow                                | -/239 | -/241  | -/241 | -/239                                                                           | -/241   |        |  |
|                               |                                                                                                                                                                                                                                  |                              | Outcome                             | --    | --     | --    | --                                                                              | --      |        |  |
|                               |                                                                                                                                                                                                                                  |                              | SAE                                 | -/231 | -/238  | -/238 | 0/231                                                                           | 1/238   |        |  |
| <b>Total</b>                  | -/239                                                                                                                                                                                                                            |                              | -/241                               |       | 0/239  |       | 1/241                                                                           |         |        |  |
| <b>Summary</b>                | The CT.gov record did not report death counts. The publication describes one death under SAE as a 'treatment emergent death'. It also reported 2 deaths during the run-in period that were not included in the participant flow. |                              |                                     |       |        |       |                                                                                 |         |        |  |
| <b>Case 9</b>                 |                                                                                                                                                                                                                                  |                              |                                     |       |        |       |                                                                                 |         |        |  |
| Metastatic penile cancer      | No (in record); Y (in publication) Overall survival was a reported outcome, unclear whether primary or secondary                                                                                                                 |                              | Follow up: 'Timeframe 9 y and 6 mo' |       |        |       | Follow up: Duration of enrollment 4/2000 through 9/2008 (max FU up to 7 y 5 mo) |         |        |  |
|                               |                                                                                                                                                                                                                                  |                              | Flow                                | -/30  | -/30   | -/30  | -/30                                                                            | -/30    |        |  |
|                               |                                                                                                                                                                                                                                  |                              | Outcome                             | -/30  | -/30   | -/30  | 20/30                                                                           | 20/30   |        |  |
|                               |                                                                                                                                                                                                                                  |                              | SAE                                 | -/30  | -/30   | -/30  | --                                                                              | --      |        |  |
| <b>Total</b>                  | -/30                                                                                                                                                                                                                             |                              | -/30                                |       | 20/30  |       | 20/30                                                                           |         |        |  |
| <b>Summary</b>                | The CT.gov record did not include death counts even though "overall survival" was a pre-specified outcome. The publication reported 20 deaths for this outcome.                                                                  |                              |                                     |       |        |       |                                                                                 |         |        |  |

Data collection in ClinicalTrials.gov on Feb 14 2012

Abbreviations: CT.gov, ClinicalTrials.gov; D/C, discontinuation; NCT, National Clinical Trial (number); SAE, serious adverse events; -- (dash), not reported;

1  
2  
3  
4  
5  
6  
7  
8  
9  
10  
11  
12  
13  
14  
15  
16  
17  
18  
19  
20  
21  
22  
23  
24  
25  
26  
27  
28  
29  
30  
31  
32  
33  
34  
35  
36  
37  
38  
39  
40  
41  
42  
43  
44  
45  
46  
47  
48  
49  
50  
51  
52  
53  
54  
55  
56  
57  
58  
59  
60



Figure 1. Reporting of death counts by data module in 123 ClinicalTrials.gov records  
254x190mm (96 x 96 DPI)

Review only



Figure 2. Consistency of death in matched pairs in (A) those with death counts in ClinicalTrials.gov and (B) those without information on death in ClinicalTrials.gov  
254x190mm (96 x 96 DPI)

ew only

1  
2  
3  
4  
5  
6  
7  
8  
9  
10  
11  
12  
13  
14  
15  
16  
17  
18  
19  
20  
21  
22  
23  
24  
25  
26  
27  
28  
29  
30  
31  
32  
33  
34  
35  
36  
37  
38  
39  
40  
41  
42  
43  
44  
45  
46  
47  
48  
49  
50  
51  
52  
53  
54  
55  
56  
57  
58  
59  
60



254x190mm (96 x 96 DPI)

Review only

1  
2  
3  
4  
5  
6  
7  
8  
9  
10  
11  
12  
13  
14  
15  
16  
17  
18  
19  
20  
21  
22  
23  
24  
25  
26  
27  
28  
29  
30  
31  
32  
33  
34  
35  
36  
37  
38  
39  
40  
41  
42  
43  
44  
45  
46  
47  
48  
49  
50  
51  
52  
53  
54  
55  
56  
57  
58  
59  
60

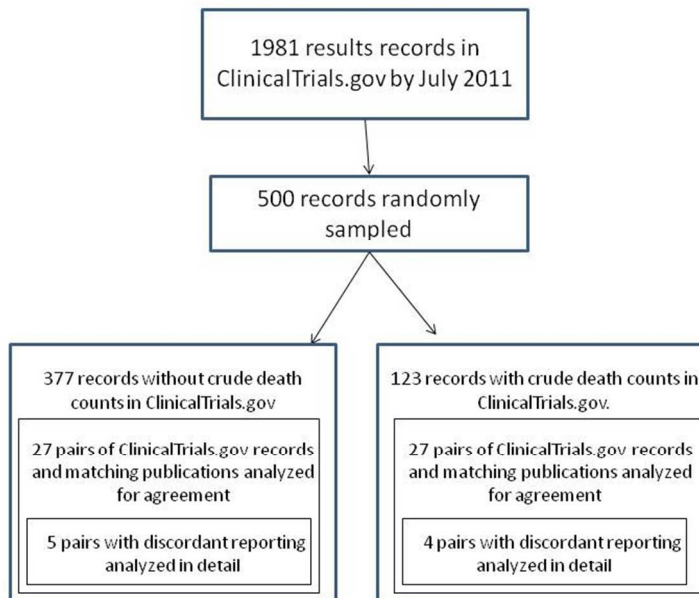

254x190mm (96 x 96 DPI)

Review only

## Appendix 2. Examples death counts reported in modules in ClinicalTrials.gov records

### Primary of secondary outcome

#### Measured Values

|                                                                                               | Evaluable Patients |
|-----------------------------------------------------------------------------------------------|--------------------|
| <b>Number of Participants Analyzed</b><br>[units: participants]                               | 15                 |
| <b>Number of Participants (Patients) Who Died Due to Transplant.</b><br>[units: Participants] | 4                  |

No statistical analysis provided for Number of Participants (Patients) Who Died Due to Transplant

### Serious Adverse Events

#### Serious Adverse Events

|                                               | Home Monitoring  | Conventional    |
|-----------------------------------------------|------------------|-----------------|
| <b>Total, serious adverse events</b>          |                  |                 |
| <b># participants affected / at risk</b>      | 124/977 (12.69%) | 74/473 (15.64%) |
| <b>Cardiac disorders</b>                      |                  |                 |
| <b>Cardiac related hospitalizations †</b>     |                  |                 |
| <b># participants affected / at risk</b>      | 45/977 (4.61%)   | 31/473 (6.55%)  |
| <b># events</b>                               | 64               | 35              |
| <b>General disorders</b>                      |                  |                 |
| <b>Death †</b>                                |                  |                 |
| <b># participants affected / at risk</b>      | 52/977 (5.32%)   | 26/473 (5.50%)  |
| <b># events</b>                               | 52               | 26              |
| <b>Non-cardiac related hospitalizations †</b> |                  |                 |
| <b># participants affected / at risk</b>      | 16/977 (1.64%)   | 3/473 (0.63%)   |
| <b># events</b>                               | 20               | 4               |

## Participant Flow

## Participant Flow: Overall Study

|                                  | Docetaxel + Sunitinib | Docetaxel  |
|----------------------------------|-----------------------|------------|
| <b>STARTED</b>                   | <b>296</b>            | <b>297</b> |
| <b>Treated</b>                   | <b>295</b>            | <b>293</b> |
| <b>COMPLETED</b>                 | <b>0</b>              | <b>0</b>   |
| <b>NOT COMPLETED</b>             | <b>296</b>            | <b>297</b> |
| Study Ongoing                    | 19                    | 31         |
| Protocol Violation               | 1                     | 1          |
| Lost to Follow-up                | 2                     | 5          |
| Death                            | 10                    | 4          |
| Objective Progression or Relapse | 227                   | 206        |
| Participant refused              | 3                     | 7          |
| Unspecified                      | 34                    | 43         |

review only



## Appendix 3. Example of a ClinicalTrials.gov record with an indeterminate total number of deaths

### Module A

#### Recruitment Details

Key information relevant to the recruitment process for the overall study, such as dates of the recruitment period and locations

Between June 1997 and June 1999, 1491 women from 20 countries were enrolled in the study. The last patient last visit occurred in January 2010.

#### Pre-Assignment Details

Significant events and approaches for the overall study following participant enrollment, but prior to group assignment

Eleven women (1 who had been randomly assigned to receive TAC and 10 assigned to receive FAC) did not receive any treatment for the following reasons: 8 withdrew consent, 1 was lost to follow-up, and 2 did not receive treatment for other reasons. In total 1480 patients (744 in the TAC group and 736 in the FAC group) were treated.

#### Reporting Groups

|                      | Description                                                         |
|----------------------|---------------------------------------------------------------------|
| TAC (Docetaxel)      | docetaxel in combination with doxorubicin and cyclophosphamide      |
| FAC (5-fluorouracil) | 5-fluorouracil in combination with doxorubicin and cyclophosphamide |

#### Participant Flow: Overall Study

|                                 | TAC (Docetaxel) | FAC (5-fluorouracil) |
|---------------------------------|-----------------|----------------------|
| STARTED                         | 745             | 746                  |
| COMPLETED                       | 679             | 711                  |
| NOT COMPLETED                   | 66              | 35                   |
| Adverse Event                   | 45              | 8                    |
| Death                           | 2               | 2                    |
| Lost to Follow-up               | 0               | 1                    |
| Consent Withdrawn               | 17              | 17                   |
| Breast Cancer Relapse           | 1               | 4                    |
| Violation of Inclusion Criteria | 1               | 3                    |

### Module B

2. Secondary: Number of Participants With Overall Survival Events [ Time Frame: up to 10 year follow-up ]

 Hide Outcome Measure 2

|                     |                                                                                              |
|---------------------|----------------------------------------------------------------------------------------------|
| Measure Type        | Secondary                                                                                    |
| Measure Title       | Number of Participants With Overall Survival Events                                          |
| Measure Description | Overall Survival - time from the date of randomization up to the date of death of any cause. |
| Time Frame          | up to 10 year follow-up                                                                      |
| Safety Issue        | No                                                                                           |

#### Population Description

Explanation of how the number of participants for analysis was determined. Includes whether analysis was per protocol, intention to treat, or another method. Also provides relevant details such as imputation technique, as appropriate.

No text entered.

#### Reporting Groups

|                      | Description                                                         |
|----------------------|---------------------------------------------------------------------|
| TAC (Docetaxel)      | docetaxel in combination with doxorubicin and cyclophosphamide      |
| FAC (5-fluorouracil) | 5-fluorouracil in combination with doxorubicin and cyclophosphamide |

#### Measured Values

|                                                                              | TAC (Docetaxel) | FAC (5-fluorouracil) |
|------------------------------------------------------------------------------|-----------------|----------------------|
| Number of Participants Analyzed<br>[units: participants]                     | 745             | 746                  |
| Number of Participants With Overall Survival Events<br>[units: Participants] | 188             | 241                  |

**Table 1: Cases with number of death counts in ClinicalTrials.gov record that are discrepant/discordant with the corresponding publication**

| Population                 | Was death a specified outcome? <sup>1</sup> , Define                                                                                                                                                                                                                                                                                                                                                                                                                                                                                                                                                                                                       | Reporting module or location | ClinicalTrials.gov record                                              |                    | Publication                                                                     |         |
|----------------------------|------------------------------------------------------------------------------------------------------------------------------------------------------------------------------------------------------------------------------------------------------------------------------------------------------------------------------------------------------------------------------------------------------------------------------------------------------------------------------------------------------------------------------------------------------------------------------------------------------------------------------------------------------------|------------------------------|------------------------------------------------------------------------|--------------------|---------------------------------------------------------------------------------|---------|
|                            |                                                                                                                                                                                                                                                                                                                                                                                                                                                                                                                                                                                                                                                            |                              | Deaths/Randomized                                                      |                    | Deaths/Randomized                                                               |         |
|                            |                                                                                                                                                                                                                                                                                                                                                                                                                                                                                                                                                                                                                                                            |                              | Arm 1                                                                  | Arm 2              | Arm 1                                                                           | Arm 2   |
| <b>Case 1</b>              |                                                                                                                                                                                                                                                                                                                                                                                                                                                                                                                                                                                                                                                            |                              |                                                                        |                    |                                                                                 |         |
| Lung cancer                | Yes<br>Survival is a secondary outcome                                                                                                                                                                                                                                                                                                                                                                                                                                                                                                                                                                                                                     |                              | Follow up: While on study drug + 30 d after last dose (estimated 4 mo) |                    | Follow up: From random assignment until first day of progression or until death |         |
|                            |                                                                                                                                                                                                                                                                                                                                                                                                                                                                                                                                                                                                                                                            | Flow                         | /52                                                                    | -/51               | 4/52                                                                            | 2/51    |
|                            |                                                                                                                                                                                                                                                                                                                                                                                                                                                                                                                                                                                                                                                            | Outcome                      | -/52                                                                   | -/51               | --                                                                              | --      |
|                            |                                                                                                                                                                                                                                                                                                                                                                                                                                                                                                                                                                                                                                                            | SAE                          | 1/52                                                                   | 0/51               | 1/52                                                                            | 2/51    |
|                            |                                                                                                                                                                                                                                                                                                                                                                                                                                                                                                                                                                                                                                                            | <b>Total</b>                 | >1/52                                                                  | >0/51              | >4/52                                                                           | >2/51   |
| <b>Summary</b>             | Both CT.gov record and the publication reported hazards ratios for survival and mean survival in months, but not the number of deaths for the outcome. Both reported deaths under serious adverse events, but counts differed between record and report. In addition the publication reported deaths in the flow diagram, while the record did not. The total number of deaths is discrepant between record and publication; however, neither it likely to represent the total number of deaths that occurred during the study.                                                                                                                            |                              |                                                                        |                    |                                                                                 |         |
| <b>Case 2</b>              |                                                                                                                                                                                                                                                                                                                                                                                                                                                                                                                                                                                                                                                            |                              |                                                                        |                    |                                                                                 |         |
| Multiple myeloma           | No                                                                                                                                                                                                                                                                                                                                                                                                                                                                                                                                                                                                                                                         |                              | Follow up: Up to 18 mo                                                 |                    | Follow up: Enrolled 2/06-12/06, analysis through 8/2007                         |         |
|                            |                                                                                                                                                                                                                                                                                                                                                                                                                                                                                                                                                                                                                                                            | Flow                         | 1/53                                                                   | 1/43               | 1/53                                                                            | 1/43    |
|                            |                                                                                                                                                                                                                                                                                                                                                                                                                                                                                                                                                                                                                                                            | Outcome                      | -/53                                                                   | -/41               | --                                                                              | --      |
|                            |                                                                                                                                                                                                                                                                                                                                                                                                                                                                                                                                                                                                                                                            | SAE                          | -/53                                                                   | -/42               | 4/53                                                                            | 1/42    |
|                            |                                                                                                                                                                                                                                                                                                                                                                                                                                                                                                                                                                                                                                                            | <b>Total</b>                 | 1/53                                                                   | 1/43               | 4/53                                                                            | 1/43    |
| <b>Summary</b>             | Both CT.gov record and publication reported 1 death per arm in the participant flow. The total number of deaths is discrepant between record and publication, however, since the publication also reported 5 deaths under SAE.                                                                                                                                                                                                                                                                                                                                                                                                                             |                              |                                                                        |                    |                                                                                 |         |
| <b>Case 3</b>              |                                                                                                                                                                                                                                                                                                                                                                                                                                                                                                                                                                                                                                                            |                              |                                                                        |                    |                                                                                 |         |
| Refractory prostate cancer | Yes<br>Survival is the primary outcome                                                                                                                                                                                                                                                                                                                                                                                                                                                                                                                                                                                                                     |                              | Follow up: Analyzed through 9/2009                                     |                    | Follow up: Analyzed through 9/2009                                              |         |
|                            |                                                                                                                                                                                                                                                                                                                                                                                                                                                                                                                                                                                                                                                            | Flow                         | -/377                                                                  | -/378              | -/377                                                                           | -/378   |
|                            |                                                                                                                                                                                                                                                                                                                                                                                                                                                                                                                                                                                                                                                            | Outcome                      | -/377                                                                  | -/378              | 279/377                                                                         | 234/378 |
|                            |                                                                                                                                                                                                                                                                                                                                                                                                                                                                                                                                                                                                                                                            | SAE                          | 0/371 sudden death                                                     | 1/371 sudden death | 275/371                                                                         | 227/371 |
|                            |                                                                                                                                                                                                                                                                                                                                                                                                                                                                                                                                                                                                                                                            | <b>Total</b>                 | >0/377                                                                 | >1/371             | 279/377                                                                         | 234/378 |
| <b>Summary</b>             | The CT.gov record reported hazards ratios for survival as well as survival in months, but not the total number of deaths per arm for this outcome. The publication reported a large number of deaths per arms for the outcome of survival (as) and also a large number of deaths under SAE. The numerators and denominators differed slightly based on intention to treat analyses or per protocol analyses. The CT.gov record reported only one death under SAE; although based on the survival analysis, it appeared likely that the total number of deaths in the study was higher. The total number of deaths is discrepant between record and report. |                              |                                                                        |                    |                                                                                 |         |
| <b>Case 4</b>              |                                                                                                                                                                                                                                                                                                                                                                                                                                                                                                                                                                                                                                                            |                              |                                                                        |                    |                                                                                 |         |
| Chronic Obstructive        | Yes<br>Death is a secondary                                                                                                                                                                                                                                                                                                                                                                                                                                                                                                                                                                                                                                |                              | Follow up: 52 wk                                                       |                    | Follow up: 52 wk                                                                |         |
|                            |                                                                                                                                                                                                                                                                                                                                                                                                                                                                                                                                                                                                                                                            | Flow                         | -/772                                                                  | -/796              | -/772                                                                           | -/796   |
|                            |                                                                                                                                                                                                                                                                                                                                                                                                                                                                                                                                                                                                                                                            | Outcome                      | -/25                                                                   | -/25               | 25/772                                                                          | 25/796  |

<sup>1</sup> In the ClinicalTrials.gov record

1  
2  
3  
4  
5  
6  
7  
8  
9  
10  
11  
12  
13  
14  
15  
16  
17  
18  
19  
20  
21  
22  
23  
24  
25  
26  
27  
28  
29  
30  
31  
32  
33  
34  
35  
36  
37  
38  
39  
40  
41  
42  
43  
44  
45  
46  
47  
48  
49

|                   |                                                                                                                                                                                                                                                                                                                                                                                                                                                                                                                                                                                                                                                                               |                                                             |                                    |                                    |                                       |        |
|-------------------|-------------------------------------------------------------------------------------------------------------------------------------------------------------------------------------------------------------------------------------------------------------------------------------------------------------------------------------------------------------------------------------------------------------------------------------------------------------------------------------------------------------------------------------------------------------------------------------------------------------------------------------------------------------------------------|-------------------------------------------------------------|------------------------------------|------------------------------------|---------------------------------------|--------|
| Pulmonary Disease | outcome                                                                                                                                                                                                                                                                                                                                                                                                                                                                                                                                                                                                                                                                       | SAE                                                         | 1/778 sudden death;<br>0/778 death | 3/790 sudden death;<br>2/790 death | -/778                                 | -/790  |
|                   |                                                                                                                                                                                                                                                                                                                                                                                                                                                                                                                                                                                                                                                                               | <b>Total</b>                                                | 25/772                             | 25/796                             | 25/772                                | 25/796 |
| <b>Summary</b>    | The CT.gov record reported 25 per arm as number analyzed in the outcome module and defined the number analyzed as the number died. Further, the CT.gov record reports deaths under SAE using two different death definitions ('sudden death' and 'death'), while the publication does not report any. Assuming that the deaths reported under SAE in the record are included in those reported for the outcome of death, the total number of deaths is consistent across record and publication. The publication describes 2 trials of similar design with two separate NCT number, but only the results corresponding to the trial in the index CT.gov record were compared. |                                                             |                                    |                                    |                                       |        |
| <b>Case 5</b>     |                                                                                                                                                                                                                                                                                                                                                                                                                                                                                                                                                                                                                                                                               |                                                             |                                    |                                    |                                       |        |
| Prostate cancer   | Yes<br>Death is a secondary outcome                                                                                                                                                                                                                                                                                                                                                                                                                                                                                                                                                                                                                                           | Follow up: From start of therapy up to 30 d after last dose |                                    |                                    | Follow up: Duration of therapy + 30 d |        |
|                   |                                                                                                                                                                                                                                                                                                                                                                                                                                                                                                                                                                                                                                                                               | Flow                                                        | -/48                               | -/47                               | --                                    | -/47   |
|                   |                                                                                                                                                                                                                                                                                                                                                                                                                                                                                                                                                                                                                                                                               | Outcome                                                     | 2/48                               | 2/47                               | --                                    | -/47   |
|                   |                                                                                                                                                                                                                                                                                                                                                                                                                                                                                                                                                                                                                                                                               | SAE                                                         | -/95                               |                                    | --                                    | 2/47   |
| <b>Total</b>      | 2/48                                                                                                                                                                                                                                                                                                                                                                                                                                                                                                                                                                                                                                                                          | 2/47                                                        | --                                 | 2/47                               |                                       |        |
| <b>Summary</b>    | The CT.gov record reported results for 2 arms. The publication presents only results for Arm 2. The CT.gov report shows 2 deaths in the outcome module, but none under SAE. The publication shows 2 deaths under SAE. The number of deaths reported for this arm was consistent between record and publication.                                                                                                                                                                                                                                                                                                                                                               |                                                             |                                    |                                    |                                       |        |

Data collection in ClinicalTrials.gov on Feb 14 2012

Abbreviations: CT.gov, ClinicalTrials.gov; D/C, discontinuation; NCT, National Clinical Trial (number); SAE, serious adverse events; -- (dash), not reported;

Table 2 | Cases without **any** information on death **numbers** in ClinicalTrials.gov record but reports of **number of** death **counts** in the corresponding publication

| Population                    | Was death a specified outcome?, Define                                                                                                                                                                                           | Reporting module or location | ClinicalTrials.gov record           |        |       |       | Publication                                                                     |         |        |
|-------------------------------|----------------------------------------------------------------------------------------------------------------------------------------------------------------------------------------------------------------------------------|------------------------------|-------------------------------------|--------|-------|-------|---------------------------------------------------------------------------------|---------|--------|
|                               |                                                                                                                                                                                                                                  |                              | Deaths/Randomized                   |        |       |       | Deaths/Randomized                                                               |         |        |
|                               |                                                                                                                                                                                                                                  |                              | Arm 1                               |        | Arm 2 |       | Arm 1                                                                           | Arm 2   |        |
| <b>Case 6</b>                 |                                                                                                                                                                                                                                  |                              |                                     |        |       |       |                                                                                 |         |        |
| Influenza vaccine in elderly  | No                                                                                                                                                                                                                               |                              | Follow up: 6 mo                     |        |       |       | Follow up: 6 mo                                                                 |         |        |
|                               |                                                                                                                                                                                                                                  |                              | Flow                                | -/857  | -/848 | -/870 | -/1262                                                                          | -/2575  | -/1262 |
|                               |                                                                                                                                                                                                                                  |                              | Outcome                             | --     | --    | --    | --                                                                              | --      | --     |
|                               |                                                                                                                                                                                                                                  |                              | SAE                                 | -/855  | -/848 | -/870 | -/1260                                                                          | 16/2573 | 7/1260 |
|                               |                                                                                                                                                                                                                                  |                              | <b>Total</b>                        | -/2575 |       |       | -/1262                                                                          | 7/1262  |        |
| <b>Summary</b>                | The CT.gov record did not report deaths counts across 4 arms. The publication described 23 deaths under SAE for 2 arms, collapsing arms 1-3 into one.                                                                            |                              |                                     |        |       |       |                                                                                 |         |        |
| <b>Case 7</b>                 |                                                                                                                                                                                                                                  |                              |                                     |        |       |       |                                                                                 |         |        |
| Amyotrophic lateral sclerosis | No                                                                                                                                                                                                                               |                              | Follow up: 9 mo                     |        |       |       | Follow up: 10 mo                                                                |         |        |
|                               |                                                                                                                                                                                                                                  |                              | Flow                                | -/75   | -/75  | -/75  | 3/75                                                                            | 5/75    |        |
|                               |                                                                                                                                                                                                                                  |                              | Outcome                             | -/75   | -/75  | -/75  | --                                                                              | --      |        |
|                               |                                                                                                                                                                                                                                  |                              | SAE                                 | -/75   | -/75  | -/75  | 3/75                                                                            | 5/75    |        |
|                               |                                                                                                                                                                                                                                  |                              | <b>Total</b>                        | -/75   | -/75  |       | 3/75                                                                            | 5/75    |        |
| <b>Summary</b>                | The CT.gov record did not report death counts. The publication describes 8 deaths under participant flow as well as under SAE, which are presumably the same.                                                                    |                              |                                     |        |       |       |                                                                                 |         |        |
| <b>Case 8</b>                 |                                                                                                                                                                                                                                  |                              |                                     |        |       |       |                                                                                 |         |        |
| Diabetes Mellitus Type 2      | No                                                                                                                                                                                                                               |                              | Follow up: 26 wk                    |        |       |       | Follow up: 26 wk                                                                |         |        |
|                               |                                                                                                                                                                                                                                  |                              | Flow                                | -/239  | -/239 | -/241 | -/239                                                                           | -/241   |        |
|                               |                                                                                                                                                                                                                                  |                              | Outcome                             | --     | --    | --    | --                                                                              | --      |        |
|                               |                                                                                                                                                                                                                                  |                              | SAE                                 | -/231  | -/231 | -/238 | 0/231                                                                           | 1/238   |        |
|                               |                                                                                                                                                                                                                                  |                              | <b>Total</b>                        | -/239  | -/241 |       | 0/239                                                                           | 1/241   |        |
| <b>Summary</b>                | The CT.gov record did not report death counts. The publication describes one death under SAE as a 'treatment emergent death'. It also reported 2 deaths during the run-in period that were not included in the participant flow. |                              |                                     |        |       |       |                                                                                 |         |        |
| <b>Case 9</b>                 |                                                                                                                                                                                                                                  |                              |                                     |        |       |       |                                                                                 |         |        |
| Metastatic penile cancer      | No (in record); Y (in publication) Overall survival was a reported outcome, unclear whether primary or secondary                                                                                                                 |                              | Follow up: 'Timeframe 9 y and 6 mo' |        |       |       | Follow up: Duration of enrollment 4/2000 through 9/2008 (max FU up to 7 y 5 mo) |         |        |
|                               |                                                                                                                                                                                                                                  |                              | Flow                                | -/30   | -/30  | -/30  | -/30                                                                            | -/30    |        |
|                               |                                                                                                                                                                                                                                  |                              | Outcome                             | -/30   | -/30  | -/30  | 20/30                                                                           | 20/30   |        |
|                               |                                                                                                                                                                                                                                  |                              | SAE                                 | -/30   | -/30  | -/30  | --                                                                              | --      |        |
|                               |                                                                                                                                                                                                                                  |                              | <b>Total</b>                        | -/30   | -/30  |       | 20/30                                                                           | 20/30   |        |
| <b>Summary</b>                | The CT.gov record did not include death counts even though "overall survival" was a pre-specified outcome. The publication reported 20 deaths for this outcome.                                                                  |                              |                                     |        |       |       |                                                                                 |         |        |

Data collection in ClinicalTrials.gov on Feb 14 2012

Abbreviations: CT.gov, ClinicalTrials.gov; D/C, discontinuation; NCT, National Clinical Trial (number); SAE, serious adverse events; -- (dash), not reported;



**Haphazard Reporting of Deaths in Clinical Trials – a Review  
of Cases of ClinicalTrials.gov Records and Matched  
Publications: cross-sectional study**

|                                 |                                                                                                                                                                                            |
|---------------------------------|--------------------------------------------------------------------------------------------------------------------------------------------------------------------------------------------|
| Journal:                        | <i>BMJ Open</i>                                                                                                                                                                            |
| Manuscript ID:                  | bmjopen-2012-001963.R2                                                                                                                                                                     |
| Article Type:                   | Research                                                                                                                                                                                   |
| Date Submitted by the Author:   | 04-Dec-2012                                                                                                                                                                                |
| Complete List of Authors:       | Earley, Amy; Tufts Medical Center, Tufts Evidence-based Practice Center<br>Lau, Joseph; Tufts Medical Center, Tufts Evidence-based Practice Center<br>Uhlig, Katrin; Tufts Medical Center, |
| <b>Primary Subject Heading</b>: | Medical publishing and peer review                                                                                                                                                         |
| Secondary Subject Heading:      | Evidence based practice                                                                                                                                                                    |
| Keywords:                       | EPIDEMIOLOGY, PUBLIC HEALTH, STATISTICS & RESEARCH METHODS,<br>QUALITATIVE RESEARCH                                                                                                        |
|                                 |                                                                                                                                                                                            |

SCHOLARONE™  
Manuscripts

1  
2  
3 **Haphazard Reporting of Deaths in Clinical Trials – a Review of Cases of ClinicalTrials.gov**  
4  
5 **Records and Matched Publications: a cross-sectional study**  
6  
7

8  
9  
10 Amy Earley BS research associate<sup>1</sup>, Joseph Lau MD professor of medicine<sup>1,2</sup>, Katrin  
11  
12 Uhlig MD MS associate professor of medicine<sup>1,2,3</sup>  
13

14  
15  
16 Author affiliations:  
17

18 <sup>1</sup> Tufts Evidence-based Practice Center, Tufts Medical Center, Boston, MA 02111, US  
19

20 <sup>2</sup> Tufts University School of Medicine, Boston, MA 02111, US  
21

22 <sup>3</sup> Division of Nephrology, Department of Medicine, Tufts Medical Center, Boston, MA  
23  
24 02111, US  
25  
26

27  
28  
29 Corresponding author:  
30

31 Katrin Uhlig MD, MS  
32

33 Tufts Medical Center  
34

35 800 Washington Street, #391  
36

37 Boston, Massachusetts, 02111, USA  
38

39 Email: kuhlig@tuftsmedicalcenter.org  
40  
41

42  
43  
44 Word Count:  
45

46 Abstract: 287  
47

48 Manuscript Text: 2945  
49  
50  
51  
52  
53  
54  
55  
56  
57  
58  
59  
60

## Abstract

**Context:** A participant death is a serious event in a clinical trial and needs to be unambiguously and publicly reported.

**Objective:** To examine: 1) how often and how numbers of deaths are reported in ClinicalTrials.gov records; 2) how often total deaths can be determined per arm within a ClinicalTrials.gov results record and its corresponding publication; 3) whether counts may be discordant.

**Design:** Registry-based study of clinical trial results reporting

**Setting:** ClinicalTrials.gov results database searched in July 2011 and matched PubMed publications

**Selection criteria:** A random sample of ClinicalTrials.gov results records. Detailed review of records with a single corresponding publication.

**Main outcome measure:** ClinicalTrials.gov records reporting number of deaths under participant flow, primary or secondary outcome, or serious adverse events. Consistency in reporting of number of deaths between ClinicalTrials.gov records and corresponding publications.

**Results:** In 500 randomly selected ClinicalTrials.gov records, only 123 records (25%) reported a number for deaths. Reporting of deaths across data modules for participant flow, primary or secondary outcomes, and serious adverse events was variable. In a sample of 27 pairs of ClinicalTrials.gov records with number of deaths and corresponding publications, total deaths

1  
2  
3 per arm could only be determined in 56% (15/27 pairs) but were discordant in 19% (5/27). In 27  
4  
5 pairs of ClinicalTrials.gov records without any information on number of deaths, 48% (13/27)  
6  
7 were discordant since the publications reported absence of deaths in 33% (9/27) and positive  
8  
9 death numbers in 15% (4/27).  
10

11  
12  
13  
14 **Conclusions:** Deaths are variably reported in ClinicalTrials.gov records. A reliable total number  
15  
16 of deaths per arm cannot always be determined with certainty or can be discordant with number  
17  
18 reported in corresponding trial publications. This highlights a need for unambiguous and  
19  
20 complete reporting of number of deaths in trial registries and publications.  
21  
22  
23  
24  
25  
26  
27  
28  
29  
30  
31  
32  
33  
34  
35  
36  
37  
38  
39  
40  
41  
42  
43  
44  
45  
46  
47  
48  
49  
50  
51  
52  
53  
54  
55  
56  
57  
58  
59  
60



## Article Summary

### Article focus

- We hypothesized that the lack of clear expectations for reporting all deaths in clinical trials give rise to discrepancies in number of deaths reported across reports of a trial.

### Key messages

- There is a lack of clarity, consistency and agreement in reporting of deaths in clinical trials which highlights the need for unambiguous templates to standardize reporting of total number of deaths per arm in ClinicalTrials.gov records and more explicit reporting guidelines for peer reviewed publications.

### Strengths and limitations of this study

- Our findings indicate a need for explicit expectations for reporting of all deaths.
- We suggest amendments to reporting formats such as: number of participants who started per arm, total number of deaths from any cause per arm and the time point of last ascertainment to prompt study investigators to sum up all deaths across participant loss, primary or secondary outcomes, and serious adverse events.
- We examined only a small number of matched cases which may not be generalisable. Nevertheless, even these small samples illustrate ambiguity within records and inconsistencies across reports of the same trial.
- We used only data available in the publicly available reports and only counted actual number of deaths and not alternate information on death, such as percents or survival analyses, as exact back calculations are not always possible.

1  
2  
3  
4  
5  
6  
7  
8  
9  
10  
11  
12  
13  
14  
15  
16  
17  
18  
19  
20  
21  
22  
23  
24  
25  
26  
27  
28  
29  
30  
31  
32  
33  
34  
35  
36  
37  
38  
39  
40  
41  
42  
43  
44  
45  
46  
47  
48  
49  
50  
51  
52  
53  
54  
55  
56  
57  
58  
59  
60

- We followed operational rules to determine total deaths per arm within a report. These operational rules were not overly stringent and more rigid expectations would have resulted in fewer reports with the data amenable for detailed analysis.

For peer review only

## Introduction

The death of a clinical trial subject is a serious event that needs to be publicly disclosed. Incomplete reporting of deaths may overemphasize health benefits when benefits and harms of medical interventions are summarized.<sup>1;2</sup> For unambiguous reporting, all deaths have to be reported for each trial arm and the absence of deaths must be explicitly stated if none were known to have occurred.

Formal reporting expectations for public disclosure of deaths in clinical trials are complex. During a trial, the United States Food and Drug Administration (FDA) expects a sponsor of an investigational new drug to submit annual reports that include a list of subjects who died during participation in the investigation, with the cause of death for each subject<sup>3</sup>. This means all deaths must be reported to the FDA, regardless of cause.

Sponsors of investigational new drugs also need to promptly report to the FDA and trial investigators serious unexpected events if they are suspected adverse reactions, meaning that there is a “reasonable possibility” that the drug caused it<sup>4;5</sup>. Further, the FDA regulations specify that the sponsor report “an aggregate analysis of specific events observed in a clinical trial ...that indicates those events occur more frequently in the drug treatment group than in a concurrent or historical control group<sup>6</sup>” suggesting that the events may be caused by the drug.<sup>5</sup>

After trial completion, trial registries such as ClinicalTrials.gov provide Web-based public records of trial results of federally and privately funded trials.<sup>7</sup> Results reporting in ClinicalTrials.gov is mandated by the United States Food and Drug Administration (FDA) Amendments Act which requires the reporting of summary results for certain studies within 1 year of completing data collection for the prespecified primary outcome.<sup>7-9</sup> These are phase II-IV interventional studies of FDA approved drugs, biological products, and devices with at least one US site ongoing after 2007<sup>7-9</sup>. Based on this Act, the results data bank of the ClinicalTrials.gov registry shall include “a table of anticipated and unanticipated serious adverse events grouped by organ system with number and frequency in each arms of the trial”<sup>10</sup>. The

1  
2  
3 ClinicalTrials.gov data element definitions define adverse events as “unfavorable changes in  
4 health ..., that occur in trial participants during the clinical trial or within a specified period  
5 following the trial” and under serious adverse events include “adverse events that result in  
6 death”<sup>11</sup>. This reporting of deaths as a serious adverse event is currently the only requirement  
7 for reporting of deaths in ClinicalTrials.gov and requires a judgment about the possibility of a  
8 causal association. However, causality assessment for a nonspecific event such as death may  
9 be a challenge.<sup>12</sup>

10  
11  
12 The peer reviewed publication of clinical trials is guided by CONSORT.<sup>13</sup> The main  
13 reporting CONSORT guideline does not specify a need to report all deaths; however, the  
14 extension for reporting of adverse events states that “Authors should always report deaths in  
15 each study group during a trial, regardless of whether death is an end point and regardless of  
16 whether attribution to a specific cause is possible”<sup>14</sup>.

17  
18  
19 We hypothesized that the complex reporting expectations for death give rise to  
20 discordance in deaths documented across reports of a trial. We first examined how number of  
21 deaths from any cause was reported in ClinicalTrials.gov records. We then attempted to  
22 determine the total deaths per arm in a ClinicalTrials.gov results record and in the  
23 corresponding publication. Finally, we conducted a detailed review of cases with discrepancies  
24 in death numbers to identify possible explanations.

## Methods

The ClinicalTrials.gov team provided us with a database of results records indexed in ClinicalTrials.gov (search date July 12, 2011). The database contained all records of phase II, III, or IV interventional trials with results entered between September 9, 2009 and June 14, 2011. In 500 randomly selected records, we examined the record for reporting of any number of deaths. This entailed review of three of the four scientific data modules, i.e. participant flow, primary and secondary outcomes, and serious adverse events, but not baseline characteristics. Appendix 1 shows screenshots for the three pertinent modules from a sample ClinicalTrials.gov record. We considered deaths only when a zero or a positive number for death was reported in any module, i.e. we did not derive death numbers from information on deaths reported as percentages, rates, risks, or survival curves. In the 123 records that reported some number of death, we examined in which module deaths were reported. Deaths from serious adverse events would presumably be a reason for not completing a trial and qualify to be listed as such in the participant flow module. We examined how many records reported number of deaths only in the serious adverse events module without reporting any deaths as a reason for discontinuation.

Among the 500 records, we also identified studies with an outcome measure description that implied ascertainment of death, including overall survival, time to mortality, all cause deaths, disease-specific death, composite outcomes including death and serious adverse events including deaths. In this subset, we examined how often actual numbers of deaths were reported as part of the primary or secondary outcome module when the outcome suggested that deaths were collected.

We then compared death reporting between ClinicalTrials.gov results records and corresponding publications. To select a sample of pairs, we used 2 criteria: 1) ClinicalTrials.gov records had to provide only a single PubMed Identifier (PMID) matching a publication describing trial results to avoid the need for reconciliation across several publications, and 2) publications

1  
2  
3 had to be electronically accessible through our library. Based on these two criteria, we retrieved  
4  
5 27 publications matching the ClinicalTrials.gov records that reported death numbers. We  
6  
7 sampled another 27 pairs of publications and ClinicalTrials.gov records where the record did not  
8  
9 report death numbers.  
10

11  
12 For each record or publication, we attempted to determine the total deaths per arm and  
13  
14 the numbers randomized or analyzed per arm based on the data available in the record and  
15  
16 publication, without contacting authors. This required assumptions when reconciling number of  
17  
18 deaths across the three pertinent modules in the ClinicalTrials.gov record. For the publications,  
19  
20 we searched the sections of the article corresponding to the modules. We used the following  
21  
22 operational rules for decision-making:  
23

- 24  
25 • If a report did not provide any direct information on number of deaths, no counts were  
26  
27 implied.  
28
- 29  
30 • If a number of deaths was reported in only one module in the ClinicalTrials.gov record or  
31  
32 the corresponding sections in the publication, i.e., either in participant flow, primary or  
33  
34 secondary outcome, or adverse events, this was determined to be the total number of  
35  
36 deaths.  
37
- 38  
39 • Otherwise, as a default, the highest unambiguous number of deaths in one category was  
40  
41 taken as the total number of deaths.  
42

43  
44 Appendix 3 shows an example of a record where the total number of deaths could not be  
45  
46 determined with certainty based on these rules. When the number of deaths could be  
47  
48 determined for both the ClinicalTrials.gov record and the corresponding publication following the  
49  
50 rules, we compared the numbers between the record and the publication. A pair was discordant  
51  
52 either when the total number of deaths was not the same, or when the ClinicalTrials.gov record  
53  
54 did not include any information on death numbers, yet the publication mentioned a presence or  
55  
56 absence of deaths. Discordant cases were reviewed in more detail. We extracted the  
57  
58 denominators for number of deaths from information on number started, randomized, or  
59  
60

1  
2  
3 analyzed. We further captured information on duration of follow-up and looked for possible  
4  
5 reasons for differences in number of deaths.  
6  
7  
8  
9  
10  
11  
12  
13  
14  
15  
16  
17  
18  
19  
20  
21  
22  
23  
24  
25  
26  
27  
28  
29  
30  
31  
32  
33  
34  
35  
36  
37  
38  
39  
40  
41  
42  
43  
44  
45  
46  
47  
48  
49  
50  
51  
52  
53  
54  
55  
56  
57  
58  
59  
60

For peer review only

## Results

### *Reporting of crude number of deaths in ClinicalTrials.gov results records*

In July 2011, there were 1981 records with results in ClinicalTrials.gov and 500 records were randomly chosen for further analysis (Appendix Figure 1). These included 123 records (25%) which reported a number of deaths in at least one module. Deaths were variably reported across the three modules of participant flow, primary or secondary outcome, and serious adverse events (Figure 1). Sixty-four percent of the records reported death numbers only in one of the modules, 32% in two modules and 4% in all of them. Approximately one fifth (27/123) of the records reported number of deaths only in the module for the serious adverse events, i.e. there were no deaths reported in the participant flow as a reason for not completing the trial. One fifth (24/123) reported deaths in both of these modules.

Out of the 500 records, we identified 97 with a primary or secondary outcome measure definition that implied ascertainment of deaths. Of the 97, there were 32 (33%) that reported a crude number of deaths in the primary or secondary outcome module, with or without a result for death in another metric for death, such as percentage, rate, risk estimate. The 65 records that did not report crude number of deaths in the primary or secondary outcome module nonetheless still reported number of deaths under participant flow or serious adverse events.

### *Reporting of information on death, determination of total number of deaths per arm and congruency in matched pairs*

We examined congruence of reporting of number of deaths across pairs of ClinicalTrials.gov records and corresponding trial publications. Figure 2 tabulates whether there was any information on number of deaths in a trial report, and if so, whether total number of deaths could be determined per arm following simple rules, and finally whether the total numbers per arm were concordant or discordant across pairs. We examined 27 pairs where the



1  
2  
3 ClinicalTrials.gov record contained some information on number of deaths and 27 pairs where  
4  
5 the ClinicalTrial.gov record did not contain any information on death numbers.  
6

7  
8 Of the 27 pairs with number of deaths reported in the ClinicalTrials.gov record, there  
9  
10 were 15 (55%) in which the total number of deaths per arm could be determined in both reports  
11  
12 (Figure 2, panel A). The number of deaths were concordant between the ClinicalTrials.gov  
13  
14 record and the publication in 10 pairs (37%), but discordant in five (19%). In the remaining 12  
15  
16 (44%), concordance could not be assessed because the total number of deaths per arm could  
17  
18 not be determined unambiguously for the record and the publication. The five discordant pairs  
19  
20 are shown in detail in Table 1.  
21

22  
23 In the 27 pairs where the ClinicalTrials.gov record did not contain any information on  
24  
25 death numbers, 14 (52%) pairs were concordant regarding the absence of information on  
26  
27 deaths, i.e. the trial publications also did not contain any death numbers (Figure 2, panel B).  
28  
29 However 13 (48%) publications contained information on number of deaths. In 9 studies (33%),  
30  
31 the published study affirmatively reported “no deaths” and in four studies, the published report  
32  
33 mentioned positive number of deaths (Figure 2, Panel B). These four cases are shown in Table  
34  
35 2. For example in Case 9, the ClinicalTrials.gov record did not contain any information on  
36  
37 number of deaths; but the publication reported one death under serious adverse events (Table  
38  
39 2).  
40  
41  
42  
43  
44

#### 45 *Review of cases with discordant counts*

46  
47 Tables 1 and 2 show the detailed review of the cases with discordant counts. For each  
48  
49 case, the crude number of deaths for each module or reporting location for the ClinicalTrials.gov  
50  
51 record and the corresponding publication are shown, as well as the total number of deaths per  
52  
53 arm that was determined following our operational rules. The summary contains comments and  
54  
55 interpretation of the discrepancies.  
56  
57  
58  
59  
60

1  
2  
3 In several cases, information on duration of follow-up or the time point of last  
4 assessment was not exact or varied across the reports. Comparison of number of deaths  
5 required reconciliation across reports with discordant numbers of arms (Cases 5 and 6) or  
6 discordant number of studies (Case 4). For example, in Case 5, the ClinicalTrials.gov record  
7 included two arms treated with different drug doses, while the publication reported results only  
8 for one of the arms. The number of deaths for this single arm was consistent across the  
9 ClinicalTrials.gov record and the publication. In the other cases with the same number of arms,  
10 the inference or certainty about the number of deaths within each arm differed. In addition to  
11 discordant counts, problems were lack of provision of crude death numbers even when death  
12 was an outcome of interest (Cases 1 and 3), imprecision in data entry (Case 4), reporting of  
13 deaths under serious adverse events without specification as to whether they were counted as  
14 part of the death outcome (Case 4) or the participant flow (Case 7). In most cases, the  
15 publication included a slightly higher crude number of deaths. Large discrepancies were noted  
16 in cases where the record did not report counts for an outcome that included death, while the  
17 report did (Cases 3 and 9).  
18  
19  
20  
21  
22  
23  
24  
25  
26  
27  
28  
29  
30  
31  
32  
33  
34  
35  
36  
37  
38  
39  
40  
41  
42  
43  
44  
45  
46  
47  
48  
49  
50  
51  
52  
53  
54  
55  
56  
57  
58  
59  
60

## Discussion

Our study highlights a failure of consistent and clear reporting of number of deaths in clinical trials. Only 25% of ClinicalTrials.gov results records provided some number of deaths, with great variation and overlap in the reporting across the three data modules for participant flow, primary or secondary outcomes, or serious adverse events. While we expected records reporting death as a serious adverse event to also list death as a reason for discontinuation from the trial in participant flow, a fifth of the records with death numbers reported deaths only under serious adverse events. Among ClinicalTrials.gov records with a definition for a primary or secondary outcome that implies ascertainment of death, only a third provided crude number of deaths in the data module for the primary or secondary outcome. This heterogeneous reporting and the uncertainty of whether deaths are reported in a redundant or exclusive manner across data modules, poses problems for reconciling deaths within a trial report.

Total number of deaths per arm could not always be determined unambiguously in the ClinicalTrials.gov results records or the corresponding publication. In the small sample where total deaths could be determined in both reports for the same trial, we identified examples where the number of deaths was discordant, highlighting lack of coherence and completeness. There were no clear patterns to explain the discrepancies. Finding a slightly higher crude number of deaths in publications than in ClinicalTrial.gov records suggests that number of deaths in the ClinicalTrials.gov records are not complete.

Our findings of haphazard reporting of deaths in clinical trials indicate a need for explicit expectations in reporting of all deaths regardless of whether they are considered to be a serious adverse event or not. We suggest that reporting formats for aggregate clinical trial results need to be amended to provide the following information: number of individuals who started per arm, number of deaths from any cause per arm and the time point of last ascertainment. This should prompt study investigators to sum up all deaths across participant flow, primary or secondary outcomes, and serious adverse events. Information on mean duration of follow-up is also

1  
2  
3 needed to allow calculation of rates. Given their prominent role supported by the legal  
4 regulations, clinical trials registries can spearhead uniform and consistent reporting of important  
5 trial outcomes, such as deaths. Similarly editors and sponsors must educate trialists to better  
6 meet the need for uniform reporting of all deaths.<sup>13;15</sup>  
7  
8  
9

10  
11  
12 Our study has several limitations. We examined only a small number of matched cases  
13 which may not be generalisable. Nevertheless, even these small samples illustrate ambiguity  
14 within records and inconsistencies across reports of the same trial. Also, we used only data  
15 available in these reports to determine the total number of deaths per arm. It is possible that  
16 individual patient data available to the trial investigators would allow more studies to provide  
17 unambiguous number of deaths. However, this information is not publicly available and  
18 clinicians and policy makers rely on publicly accessible trial results reported in ClinicalTrials.gov  
19 records and in journal publications. Further, we only gave credit to number of deaths and not to  
20 alternate information on death, such as percents or survival analyses, as exact back  
21 calculations are not always possible. Finally, we followed operational rules to determine total  
22 deaths per arm within a report. These operational rules were not overly stringent and more rigid  
23 expectations would have resulted in fewer reports with the data amenable for detailed analysis.  
24  
25  
26  
27  
28  
29  
30  
31  
32  
33  
34  
35  
36  
37

38 Our findings have to be viewed in context. Only 22% of studies report their results in  
39 ClinicalTrials.gov within one year of completion<sup>16</sup> and fewer than half of studies funded by the  
40 National Institutes of Health publish their results in a Medline indexed journal within 30 months  
41 of trial completion.<sup>17</sup> Thus, our matched pairs are drawn from a minority of trials that have been  
42 compliant with both expectations: publication of results in ClinicalTrials.gov and publication in a  
43 peer reviewed journal.  
44  
45  
46  
47  
48  
49  
50

51 Full reporting of all deaths enables more accurate assessment of risks and benefits  
52 associated with treatments. Assessment of patient safety relies on capturing signals, even when  
53 they are non-specific.<sup>18;19</sup> Small differences in numbers of death may bias results and distort  
54 estimates across studies. From an ethical perspective, it is desirable that trials ascertain and  
55  
56  
57  
58  
59  
60

1  
2  
3 report all deaths regardless of whether they appear to be related to study conduct or  
4  
5 intervention, are unforeseen, or non-specific. Even with a clear instructions and prompts for  
6  
7 trials to report deaths; however, there may be remaining uncertainty depending on the rigor of  
8  
9 ascertainment or surveillance and the selection of trial outcomes. Further, crude numbers are  
10  
11 not the only format for reporting deaths in a trial. Time to event reporting may be more  
12  
13 meaningful, but may introduce uncertainty about how censoring and deaths are handled. While  
14  
15 both approaches to presenting information on deaths may be necessary and complementary,  
16  
17 our study suggests that some improvement could be made with simple means of standardized  
18  
19 reporting formats.  
20  
21

22  
23 In summary, our study shows lack of clarity, consistency and agreement in reporting of  
24  
25 deaths in clinical trials. This highlights the need for unambiguous templates to standardize  
26  
27 reporting of total number of deaths per arm in ClinicalTrials.gov records and more stringent  
28  
29 reporting guidelines for peer reviewed publications.  
30  
31  
32  
33  
34  
35  
36  
37  
38  
39  
40  
41  
42  
43  
44  
45  
46  
47  
48  
49  
50  
51  
52  
53  
54  
55  
56  
57  
58  
59  
60

1  
2  
3 **Data Sharing Statement:** There is no additional available.  
4  
5  
6

7  
8 **Copyright:** The Corresponding Author has the right to grant on behalf of all authors and does  
9 grant on behalf of all authors, a worldwide license to the Publishers and its licensees in  
10 perpetuity, in all forms, formats and media (whether known now or created in the future), to i)  
11 publish, reproduce, distribute, display and store the Contribution, ii) translate the Contribution  
12 into other languages, create adaptations, reprints, include within collections and create  
13 summaries, extracts and/or, abstracts of the Contribution, iii) create any other derivative work(s)  
14 based on the Contribution, iv) to exploit all subsidiary rights in the Contribution, v) the inclusion  
15 of electronic links from the Contribution to third party material where-ever it may be located;  
16 and, vi) license any third party to do any or all of the above.  
17  
18  
19  
20  
21  
22  
23  
24  
25  
26  
27  
28

29 **Contributors:** Concept and design: AE, JL, KU; Interpretation of data: AE, JL, KU; Drafting  
30 article: AE, KU; Revision of article for important intellectual content: AE, JL, KU  
31  
32  
33  
34  
35

36 **Funding:**

37  
38 This project was funded under Contract No. HHS 290 2007-10055-I, entitled "Evidence-based  
39 Protocol for Reviewing ClinicalTrials.gov Results Database," from the Agency for Healthcare  
40 Research and Quality, U.S. Department of Health and Human Services. The authors of this  
41 report are responsible for its content. Statements in the report should not be construed as  
42 endorsement by the Agency for Healthcare Research and Quality or the U.S. Department of  
43 Health and Human Services.  
44  
45  
46  
47  
48  
49  
50

51  
52  
53 **Competing interests:** All authors have completed the ICMJE uniform disclosure form at  
54 [www.icmje.org/coi\\_disclosure.pdf](http://www.icmje.org/coi_disclosure.pdf) and declare that there are no conflicts of interest.  
55  
56  
57  
58  
59  
60

## Tables

Table 1. Cases with number of deaths in ClinicalTrials.gov record that are discordant with the corresponding publication

Table 2. Cases without any information on death numbers in ClinicalTrials.gov record but reports of number of deaths in the corresponding publication

## Figures

Figure 1. Reporting of number of deaths by data module in 123 ClinicalTrials.gov records

Figure 2. Consistency of death in matched pairs in (A) those with number of deaths in ClinicalTrials.gov and (B) those without any information on death numbers in ClinicalTrials.gov

## Appendices

Appendix Figure 1. Study Flow

Appendix 2. Examples of number of deaths reported in modules of ClinicalTrials.gov records

Appendix 3. Example of a ClinicalTrials.gov record with an indeterminate total number of deaths

Legend: In Module A, the participant flow shows 2 deaths per arm indicating a total of 4 deaths as a reason for non-completion of the trial. In Module B, results are reported for a secondary outcome entitled "Number of Participants With Overall Survival Events". The Measure Description suggests a survival analysis while the Measure Title and units show actual numbers. Since 188 of 745 participants in the TAC arm and 241 of 746 participants in the FAC arm were counted as alive in the survival analysis, 1062 individuals among 1491 participants were censored (557 vs. 505 per arm respectively). The data module for adverse events (not shown) did not provide additional information on death. Since this is a study of metastatic breast cancer, we assumed that the total number of deaths was greater than 4 as shown in the participant flow, but the actual number could not be determined with certainty.

## Reference List

- 1  
2  
3  
4  
5  
6  
7  
8  
9  
10  
11  
12  
13  
14  
15  
16  
17  
18  
19  
20  
21  
22  
23  
24  
25  
26  
27  
28  
29  
30  
31  
32  
33  
34  
35  
36  
37  
38  
39  
40  
41  
42  
43  
44  
45  
46  
47  
48  
49  
50  
51  
52  
53  
54  
55  
56  
57  
58  
59  
60
- (1) Chou R, Helfand M. Challenges in systematic reviews that assess treatment harms. *Ann Intern Med* 2005; 142(12 Pt 2):1090-1099.
- (2) Ioannidis JP, Lau J. Completeness of safety reporting in randomized trials: an evaluation of 7 medical areas. *JAMA* 2001; 285(4):437-443.
- (3) Food and Drug Administration. Code of Federal Regulations Title 21. 21 CFR 312.33(b)(3) - Annual Reports. 2012.  
Ref Type: Bill/Resolution
- (4) Investigational new drug safety reporting requirements for human drug and biological products and safety reporting requirements for bioavailability and bioequivalence studies in humans. Final rule. *Fed Regist* 2010; 75(188):59935-59963.
- (5) Sherman RB, Woodcock J, Norden J, Grandinetti C, Temple RJ. New FDA regulation to improve safety reporting in clinical trials. *N Engl J Med* 2011; 365(1):3-5.
- (6) Food and Drug Administration. Code of Federal Regulations Title 21. 21 CFR 312.32(c)(1)(i)(C)-IND safety reporting. 2012.  
Ref Type: Bill/Resolution
- (7) Zarin DA, Tse T, Williams RJ, Califf RM, Ide NC. The ClinicalTrials.gov results database-update and key issues. *N Engl J Med* 2011; 364(9):852-860.
- (8) Food and Drug Administration Amendments Act. U.S. Public Law 110-85. 2012.  
Ref Type: Bill/Resolution
- (9) Tse T, Williams RJ, Zarin DA. Reporting "basic results" in ClinicalTrials.gov. *Chest* 2009; 136(1):295-303.
- (10) Food and Drug Administration Amendments Act. U.S. Public Law 110-95. 2007.  
Ref Type: Bill/Resolution
- (11) ClinicalTrials.gov. ClinicalTrials.gov "Basic Results" Data Element Definitions. [http://prsinfo.clinicaltrials.gov/results\\_definitions.html#AdverseEvents](http://prsinfo.clinicaltrials.gov/results_definitions.html#AdverseEvents) . 2012. 6-26-2012.  
Ref Type: Online Source
- (12) Cato A. Premarketing adverse drug experiences: data management procedures. Unexpected death occurring early in clinical trials. *Drug Inf J* 1987; 21(1):3-7.
- (13) Schulz KF, Altman DG, Moher D. CONSORT 2010 statement: updated guidelines for reporting parallel group randomized trials. *Ann Intern Med* 2010; 152(11):726-732.
- (14) Ioannidis JP, Evans SJ, Gotzsche PC, O'Neill RT, Altman DG, Schulz K et al. Better reporting of harms in randomized trials: an extension of the CONSORT statement. *Ann Intern Med* 2004; 141(10):781-788.
- (15) Mansi BA, Clark J, David FS, Gesell TM, Glasser S, Gonzalez J et al. Ten recommendations for closing the credibility gap in reporting industry-sponsored clinical



1  
2  
3 research: a joint journal and pharmaceutical industry perspective. *Mayo Clin Proc* 2012;  
4 87(5):424-429.  
5

- 6  
7 (16) Prayle AP, Hurley MN, Smyth AR. Compliance with mandatory reporting of clinical trial  
8 results on ClinicalTrials.gov: cross sectional study. *BMJ* 2012; 344:d7373.  
9  
10 (17) Ross JS, Tse T, Zarin DA, Xu H, Zhou L, Krumholz HM. Publication of NIH funded trials  
11 registered in ClinicalTrials.gov: cross sectional analysis. *BMJ* 2012; 344:d7292.  
12  
13 (18) Drazen JM. COX-2 inhibitors--a lesson in unexpected problems. *N Engl J Med* 2005;  
14 352(11):1131-1132.  
15  
16 (19) Nissen SE, Wolski K. Rosiglitazone revisited: an updated meta-analysis of risk for  
17 myocardial infarction and cardiovascular mortality. *Arch Intern Med* 2010; 170(14):1191-  
18 1201.  
19  
20  
21  
22  
23  
24  
25  
26  
27  
28  
29  
30  
31  
32  
33  
34  
35  
36  
37  
38  
39  
40  
41  
42  
43  
44  
45  
46  
47  
48  
49  
50  
51  
52  
53  
54  
55  
56  
57  
58  
59  
60

1  
2  
3 **Haphazard Reporting of Deaths in Clinical Trials – a Review of Cases of ClinicalTrials.gov**  
4  
5 **Records and Matched Publications: a cross-sectional study**  
6  
7

8  
9  
10 Amy Earley BS research associate<sup>1</sup>, Joseph Lau MD professor of medicine<sup>1,2</sup>, Katrin  
11  
12 Uhlig MD MS associate professor of medicine<sup>1,2,3</sup>  
13

14  
15  
16 Author affiliations:  
17

18 <sup>1</sup> Tufts Evidence-based Practice Center, Tufts Medical Center, Boston, MA 02111, US  
19

20 <sup>2</sup> Tufts University School of Medicine, Boston, MA 02111, US  
21

22 <sup>3</sup> Division of Nephrology, Department of Medicine, Tufts Medical Center, Boston, MA  
23  
24 02111, US  
25  
26

27  
28  
29 Corresponding author:  
30

31 Katrin Uhlig MD, MS  
32

33 Tufts Medical Center  
34

35 800 Washington Street, #391  
36

37 Boston, Massachusetts, 02111, USA  
38

39 Email: [kuhlig@tuftsmedicalcenter.org](mailto:kuhlig@tuftsmedicalcenter.org)  
40  
41

42  
43  
44  
45  
46 Word Count:  
47

48 Abstract: 287

49 Manuscript Text: 29172945  
50  
51  
52  
53  
54  
55  
56  
57  
58  
59  
60

## Abstract

**Context:** A participant death is a serious event in a clinical trial and needs to be unambiguously and publicly reported.

**Objective:** To examine: 1) how often and how numbers of deaths are reported in ClinicalTrials.gov records; 2) how often total deaths can be determined per arm within a ClinicalTrials.gov results record and its corresponding publication; 3) whether counts may be discordant.

**Design:** Registry-based study of clinical trial results reporting

**Setting:** ClinicalTrials.gov results database searched in July 2011 and matched PubMed publications

**Selection criteria:** A random sample of ClinicalTrials.gov results records. Detailed review of records with a single corresponding publication.

**Main outcome measure:** ClinicalTrials.gov records reporting number of deaths under participant flow, primary or secondary outcome, or serious adverse events. Consistency in reporting of number of deaths between ClinicalTrials.gov records and corresponding publications.

**Results:** In 500 randomly selected ClinicalTrials.gov records, only 123 records (25%) reported a number for deaths. Reporting of deaths across data modules for participant flow, primary or secondary outcomes, and serious adverse events was variable. In a sample of 27 pairs of ClinicalTrials.gov records with number of deaths and corresponding publications, total deaths

1  
2  
3 per arm could only be determined in 56% (15/27 pairs) but were discordant in 19% (5/27). In 27  
4  
5 pairs of ClinicalTrials.gov records without any information on number of deaths, 48% (13/27)  
6  
7 were discordant since the publications reported absence of deaths in 33% (9/27) and positive  
8  
9 death numbers in 15% (4/27).  
10

11  
12  
13  
14 **Conclusions:** Deaths are variably reported in ClinicalTrials.gov records. A reliable total number  
15  
16 of deaths per arm cannot always be determined with certainty or can be discordant with number  
17  
18 reported in corresponding trial publications. This highlights a need for unambiguous and  
19  
20 complete reporting of number of deaths in trial registries and publications.  
21  
22  
23  
24  
25  
26  
27  
28  
29  
30  
31  
32  
33  
34  
35  
36  
37  
38  
39  
40  
41  
42  
43  
44  
45  
46  
47  
48  
49  
50  
51  
52  
53  
54  
55  
56  
57  
58  
59  
60

## Article Summary

### Article focus

- We hypothesized that the lack of clear expectations for reporting all deaths in clinical trials give rise to discrepancies in number of deaths reported across reports of a trial.

### Key messages

- There is a lack of clarity, consistency and agreement in reporting of deaths in clinical trials which highlights the need for unambiguous templates to standardize reporting of total number of deaths per arm in ClinicalTrials.gov records and more explicit reporting guidelines for peer reviewed publications.

### Strengths and limitations of this study

- Our findings indicate a need for explicit expectations for reporting of all deaths.
- We suggest amendments to reporting formats such as: number of participants who started per arm, total number of deaths from any cause per arm and the time point of last ascertainment to prompt study investigators to sum up all deaths across participant loss, primary or secondary outcomes, and serious adverse events.
- We examined only a ~~limited~~ small number of matched cases which may not be generalisable. Nevertheless, even these small samples illustrate demonstrate ambiguity within records and inconsistencies across reports of the same trial.
- We used only data available in the publicly available reports and only counted actual number of deaths and not alternate information on death, such as percents or survival analyses, as exact back calculations are not always possible.

- 1  
2  
3  
4  
5  
6  
7  
8  
9  
10  
11  
12  
13  
14  
15  
16  
17  
18  
19  
20  
21  
22  
23  
24  
25  
26  
27  
28  
29  
30  
31  
32  
33  
34  
35  
36  
37  
38  
39  
40  
41  
42  
43  
44  
45  
46  
47  
48  
49  
50  
51  
52  
53  
54  
55  
56  
57  
58  
59  
60
- We followed operational rules to determine total deaths per arm within a report. These operational rules were not overly stringent and more rigid expectations would have resulted in fewer reports with the data amenable for detailed analysis.

For peer review only

## Introduction

The death of a clinical trial subject is a serious event that needs to be publicly disclosed. Incomplete reporting of deaths may overemphasize health benefits when benefits and harms of medical interventions are summarized.<sup>1;2</sup> For unambiguous reporting, all deaths have to be reported for each trial arm and the absence of deaths must be explicitly stated if none were known to have occurred.

Formal reporting expectations for public disclosure of deaths in clinical trials are complex. During a trial, the United States Food and Drug Administration (FDA) expects a sponsor of an investigational new drug to submit annual reports that include a list of subjects who died during participation in the investigation, with the cause of death for each subject<sup>3</sup>. This means all deaths must be reported to the FDA, regardless of cause.

Sponsors of investigational new drugs also need to promptly report to the FDA and trial investigators serious unexpected events if they are suspected adverse reactions, meaning that there is a “reasonable possibility” that the drug caused it<sup>4;5</sup>. Further, the FDA regulations specify that the sponsor report “an aggregate analysis of specific events observed in a clinical trial ...that indicates those events occur more frequently in the drug treatment group than in a concurrent or historical control group<sup>6</sup>” suggesting that the events may be caused by the drug.<sup>5</sup>

After trial completion, trial registries such as ClinicalTrials.gov provide Web-based public records of trial results of federally and privately funded trials.<sup>7</sup> Results reporting in

ClinicalTrials.gov is mandated by the United States Food and Drug Administration (FDA)

Amendments Act which requires the reporting of summary results for [certain studies within 1 year of completing data collection for the prespecified primary outcome.](#)<sup>7-9</sup> These are phase II-IV interventional studies of [FDA approved](#) drugs, biological products, and devices [with at last one US site ongoing after 2007](#) ~~within 1 year of completing data collection for the prespecified primary outcome.~~<sup>7-9</sup> Based on this Act, the results data bank of the ClinicalTrials.gov registry

shall include “a table of anticipated and unanticipated serious adverse events grouped by organ

1  
2  
3 system with number and frequency in each arms of the trial"<sup>10</sup>. The ClinicalTrials.gov data  
4  
5 element definitions define adverse events as "unfavorable changes in health ..., that occur in  
6  
7 trial participants during the clinical trial or within a specified period following the trial" and under  
8  
9 serious adverse events include "adverse events that result in death"<sup>11</sup>. This reporting of deaths  
10  
11 as a serious adverse event is currently the only requirement for reporting of deaths in  
12  
13 ClinicalTrials.gov and requires a judgment about the possibility of a causal association.  
14

15  
16 However, causality assessment [for a nonspecific event such as death](#) may be a challenge.<sup>12</sup>  
17

18  
19 The peer reviewed publication of clinical trials is guided by CONSORT.<sup>13</sup> The main  
20  
21 reporting CONSORT guideline does not specify a need to report all deaths; however, the  
22  
23 extension for reporting of adverse events states that "Authors should always report deaths in  
24  
25 each study group during a trial, regardless of whether death is an end point and regardless of  
26  
27 whether attribution to a specific cause is possible"<sup>14</sup>.  
28

29  
30 We hypothesized that the complex reporting expectations for death give rise to  
31  
32 discordance in deaths documented across reports of a trial. We first examined how number of  
33  
34 deaths from any cause was reported in ClinicalTrials.gov records. We then attempted to  
35  
36 determine the total deaths per arm in a ClinicalTrials.gov results record and in the  
37  
38 corresponding publication. Finally, we conducted a detailed review of cases with discrepancies  
39  
40 in death numbers to identify possible explanations.  
41  
42  
43  
44  
45  
46  
47  
48  
49  
50  
51  
52  
53  
54  
55  
56  
57  
58  
59  
60



## Methods

The ClinicalTrials.gov team provided us with a database of results records indexed in ClinicalTrials.gov (search date July 12, 2011). The database contained all records of phase II, III, or IV interventional trials with results entered between September 9, 2009 and June 14, 2011. In 500 randomly selected records, we examined the record for reporting of any number of deaths. This entailed review of three of the four scientific data modules, i.e. participant flow, primary and secondary outcomes, and serious adverse events, but not baseline characteristics. Appendix 1 shows screenshots for the three pertinent modules from a sample ClinicalTrials.gov record. We considered deaths only when a zero or a positive number for death was reported in any module, i.e. we did not derive death numbers from information on deaths reported as percentages, rates, risks, or survival curves. In the 123 records that reported some number of death, we examined in which module deaths were reported. Deaths from serious adverse events would presumably be a reason for not completing a trial and qualify to be listed as such in the participant flow module. We examined how many records reported number of deaths only in the serious adverse events module without reporting any deaths as a reason for discontinuation.

Among the 500 records, we also identified studies with an outcome measure description that implied ascertainment of death, including overall survival, time to mortality, all cause deaths, disease-specific death, composite outcomes including death and serious adverse events including deaths. In this subset, we examined how often actual numbers of deaths were reported as part of the primary or secondary outcome module when the outcome suggested that deaths were collected.

We then compared death reporting between ClinicalTrials.gov results records and corresponding publications. To select a sample of pairs, we used 2 criteria: 1) ClinicalTrials.gov records had to provide only a single PubMed Identifier (PMID) matching a publication describing trial results to avoid the need for reconciliation across several publications, and 2) publications

1  
2  
3 had to be electronically accessible through our library. Based on these two criteria, we retrieved  
4  
5 27 publications matching the ClinicalTrials.gov records that reported death numbers. We  
6  
7 sampled another 27 pairs of publications and ClinicalTrials.gov records where the record did not  
8  
9 report death numbers.  
10

11  
12 For each record or publication, we attempted to determine the total deaths per arm and  
13  
14 the numbers randomized or analyzed per arm based on the data available in the record and  
15  
16 publication, without contacting authors. This required assumptions when reconciling number of  
17  
18 deaths across the three pertinent modules in the ClinicalTrials.gov record. For the publications,  
19  
20 we searched the sections of the article corresponding to the modules. We used the following  
21  
22 operational rules for decision-making:  
23

- 24  
25 • If a report did not provide any direct information on number of deaths, no counts were  
26  
27 implied.  
28
- 29  
30 • If a number of deaths was reported in only one module in the ClinicalTrials.gov record or  
31  
32 the corresponding sections in the publication, i.e., either in participant flow, primary or  
33  
34 secondary outcome, or adverse events, this was determined to be the total number of  
35  
36 deaths.  
37
- 38  
39 • Otherwise, as a default, the highest unambiguous number of deaths in one category was  
40  
41 taken as the total number of deaths.  
42

43  
44 Appendix 3 shows an example of a record where the total number of deaths could not be  
45  
46 determined with certainty based on these rules. When the number of deaths could be  
47  
48 determined for both the ClinicalTrials.gov record and the corresponding publication following the  
49  
50 rules, we compared the numbers between the record and the publication. A pair was discordant  
51  
52 either when the total number of deaths was not the same, or when the ClinicalTrials.gov record  
53  
54 did not include any information on death numbers, yet the publication mentioned a presence or  
55  
56 absence of deaths. Discordant cases were reviewed in more detail. We extracted the  
57  
58 denominators for number of deaths from information on number started, randomized, or  
59  
60

1  
2  
3 analyzed. We further captured information on duration of follow-up and looked for possible  
4  
5 reasons for differences in number of deaths.  
6  
7  
8  
9  
10  
11  
12  
13  
14  
15  
16  
17  
18  
19  
20  
21  
22  
23  
24  
25  
26  
27  
28  
29  
30  
31  
32  
33  
34  
35  
36  
37  
38  
39  
40  
41  
42  
43  
44  
45  
46  
47  
48  
49  
50  
51  
52  
53  
54  
55  
56  
57  
58  
59  
60

For peer review only

## Results

### *Reporting of crude number of deaths in ClinicalTrials.gov results records*

In July 2011, there were 1981 records with results in ClinicalTrials.gov and 500 records were randomly chosen for further analysis (Appendix Figure 1). These included 123 records (25%) which reported a number of deaths in at least one module. Deaths were variably reported across the three modules of participant flow, primary or secondary outcome, and serious adverse events (Figure 1). Sixty-four percent of the records reported death numbers only in one of the modules, 32% in two modules and 4% in all of them. Approximately one fifth (27/123) of the records reported number of deaths only in the module for the serious adverse events, i.e. there were no deaths reported in the participant flow as a reason for not completing the trial. One fifth (24/123) reported deaths in both of these modules.

Out of the 500 records, we identified 97 with a primary or secondary outcome measure definition that implied ascertainment of deaths. Of the 97, there were 32 (33%) that reported a crude number of deaths in the primary or secondary outcome module, with or without a result for death in another metric for death, such as percentage, rate, risk estimate. The 65 records that did not report crude number of deaths in the primary or secondary outcome module nonetheless still reported number of deaths under participant flow or serious adverse events.

### *Reporting of information on death, determination of total number of deaths per arm and congruency in matched pairs*

We examined congruence of reporting of number of deaths across pairs of ClinicalTrials.gov records and corresponding trial publications. Figure 2 tabulates whether there was any information on number of deaths in a trial report, and if so, whether total number of deaths could be determined per arm following simple rules, and finally whether the total numbers per arm were concordant or discordant across pairs. We examined 27 pairs where the

1  
2  
3 ClinicalTrials.gov record contained some information on number of deaths and 27 pairs where  
4  
5 the ClinicalTrial.gov record did not contain any information on death numbers.  
6

7  
8 Of the 27 pairs with number of deaths reported in the ClinicalTrials.gov record, there  
9  
10 were 15 (55%) in which the total number of deaths per arm could be determined in both reports  
11  
12 (Figure 2, panel A). The number of deaths were concordant between the ClinicalTrials.gov  
13  
14 record and the publication in 10 pairs (37%), but discordant in five (19%). In the remaining 12  
15  
16 (44%), concordance could not be assessed because the total number of deaths per arm could  
17  
18 not be determined unambiguously for the record and the publication. The five discordant pairs  
19  
20 are shown in detail in Table 1.  
21

22  
23 In the 27 pairs where the ClinicalTrials.gov record did not contain any information on  
24  
25 death numbers, 14 (52%) pairs were concordant regarding the absence of information on  
26  
27 deaths, i.e. the trial publications also did not contain any death numbers (Figure 2, panel B).  
28  
29 However 13 (48%) publications contained information on number of deaths. In 9 studies (33%),  
30  
31 the published study affirmatively reported “no deaths” and in four studies, the published report  
32  
33 mentioned positive number of deaths (Figure 2, Panel B). These four cases are shown in Table  
34  
35 2. For example in Case 9, the ClinicalTrials.gov record did not contain any information on  
36  
37 number of deaths; but the publication reported one death under serious adverse events (Table  
38  
39 2).  
40  
41  
42  
43  
44

#### 45 *Review of cases with discordant counts*

46  
47 Tables 1 and 2 show the detailed review of the cases with discordant counts. For each  
48  
49 case, the crude number of deaths for each module or reporting location for the ClinicalTrials.gov  
50  
51 record and the corresponding publication are shown, as well as the total number of deaths per  
52  
53 arm that was determined following our operational rules. The summary contains comments and  
54  
55 interpretation of the discrepancies.  
56  
57  
58  
59  
60

1  
2  
3 In several cases, information on duration of follow-up or the time point of last  
4 assessment was not exact or varied across the reports. Comparison of number of deaths  
5 required reconciliation across reports with discordant numbers of arms (Cases 5 and 6) or  
6 discordant number of studies (Case 4). For example, in Case 5, the ClinicalTrials.gov record  
7 included two arms treated with different drug doses, while the publication reported results only  
8 for one of the arms. The number of deaths for this single arm was consistent across the  
9 ClinicalTrials.gov record and the publication. In the other cases with the same number of arms,  
10 the inference or certainty about the number of deaths within each arm differed. In addition to  
11 discordant counts, problems were lack of provision of crude death numbers even when death  
12 was an outcome of interest (Cases 1 and 3), imprecision in data entry (Case 4), reporting of  
13 deaths under serious adverse events without specification as to whether they were counted as  
14 part of the death outcome (Case 4) or the participant flow (Case 7). In most cases, the  
15 publication included a slightly higher crude number of deaths. Large discrepancies were noted  
16 in cases where the record did not report counts for an outcome that included death, while the  
17 report did (Cases 3 and 9).  
18  
19  
20  
21  
22  
23  
24  
25  
26  
27  
28  
29  
30  
31  
32  
33  
34  
35  
36  
37  
38  
39  
40  
41  
42  
43  
44  
45  
46  
47  
48  
49  
50  
51  
52  
53  
54  
55  
56  
57  
58  
59  
60

## Discussion

Our study highlights a failure of consistent and clear reporting of number of deaths in clinical trials. Only 25% of ClinicalTrials.gov results records provided some number of deaths, with great variation and overlap in the reporting across the three data modules for participant flow, primary or secondary outcomes, or serious adverse events. While we expected records reporting death as a serious adverse event to also list death as a reason for discontinuation from the trial in participant flow, a fifth of the records with death numbers reported deaths only under serious adverse events. Among ClinicalTrials.gov records with a definition for a primary or secondary outcome that implies ascertainment of death, only a third provided crude number of deaths in the data module for the primary or secondary outcome. This heterogeneous reporting and the uncertainty of whether deaths are reported in a redundant or exclusive manner across data modules, poses problems for reconciling deaths within a trial report.

Total number of deaths per arm could not always be determined unambiguously in the ClinicalTrials.gov results records or the corresponding publication. In the small sample where total deaths could be determined in both reports for the same trial, we identified examples where the number of deaths was discordant, highlighting lack of coherence and completeness. There were no clear patterns to explain the discrepancies. Finding a slightly higher crude number of deaths in publications than in ClinicalTrials.gov records suggests that number of deaths in the ClinicalTrials.gov records are not complete.

Our findings of haphazard reporting of deaths in clinical trials indicate a need for explicit expectations in reporting of all deaths regardless of whether they are considered to be a serious adverse event or not. We suggest that reporting formats for aggregate clinical trial results need to be amended to provide the following information: number of individuals who started per arm, number of deaths from any cause per arm and the time point of last ascertainment. This should prompt study investigators to sum up all deaths across participant flow, primary or secondary outcomes, and serious adverse events. Information on mean duration of follow-up is also

1  
2  
3 needed to allow calculation of rates. Given their prominent role supported by the legal  
4 regulations, clinical trials registries can spearhead uniform and consistent reporting of important  
5 trial outcomes, such as deaths. Similarly editors and sponsors must educate trialists to better  
6 meet the need for uniform reporting of all deaths.<sup>13;15</sup>  
7  
8  
9

10  
11 Our study has several limitations. We examined only a limited-small number of matched  
12 cases which may not be generalisable. Nevertheless, even these small samples demonstrate  
13 illustrate ambiguity within records and inconsistencies across reports of the same trial. Also, we  
14 used only data available in these reports to determine the total number of deaths per arm. It is  
15 possible that individual patient data available to the trial investigators would allow more studies  
16 to provide unambiguous number of deaths. However, this information is not publicly available  
17 and clinicians and policy makers rely on publicly accessible trial results reported in  
18 ClinicalTrials.gov records and in journal publications. Further, we only gave credit to number of  
19 deaths and not to alternate information on death, such as percents or survival analyses, as  
20 exact back calculations are not always possible. Finally, we followed operational rules to  
21 determine total deaths per arm within a report. These operational rules were not overly stringent  
22 and more rigid expectations would have resulted in fewer reports with the data amenable for  
23 detailed analysis.  
24  
25  
26  
27  
28  
29  
30  
31  
32  
33  
34  
35  
36  
37  
38  
39

40 Our findings have to be viewed in context. Only 22% of studies report their results in  
41 ClinicalTrials.gov within one year of completion<sup>16</sup> and fewer than half of studies funded by the  
42 National Institutes of Health publish their results in a Medline indexed journal within 30 months  
43 of trial completion.<sup>17</sup> Thus, our matched pairs are drawn from a minority of trials that have been  
44 compliant with both expectations: publication of results in ClinicalTrials.gov and publication in a  
45 peer reviewed journal.  
46  
47  
48  
49  
50  
51

52 Full reporting of all deaths enables more accurate assessment of risks and benefits  
53 associated with treatments. Assessment of patient safety relies on capturing signals, even when  
54 they are non-specific.<sup>18;19</sup> Small differences in numbers of death may bias results and distort  
55  
56  
57  
58  
59  
60



1  
2  
3 estimates across studies. From an ethical perspective, it is desirable that trials ascertain and  
4 report all deaths regardless of whether they appear to be related to study conduct or  
5 intervention, are unforeseen, or non-specific. Even with a clear instructions and prompts for  
6 trials to report deaths; however, there may be remaining uncertainty depending on the rigor of  
7 ascertainment or surveillance and the selection of trial outcomes. Further, crude numbers are  
8 not the only format for reporting deaths in a trial. Time to event reporting may be more  
9 meaningful, but may introduce uncertainty about how censoring and deaths are handled. While  
10 both approaches to presenting information on deaths may be necessary and complementary,  
11 our study suggests that some improvement could be made with simple means of standardized  
12 reporting formats.  
13  
14  
15  
16  
17  
18  
19  
20  
21  
22  
23  
24

25 In summary, our study shows lack of clarity, consistency and agreement in reporting of  
26 deaths in clinical trials. This highlights the need for unambiguous templates to standardize  
27 reporting of total number of deaths per arm in ClinicalTrials.gov records and more stringent  
28 reporting guidelines for peer reviewed publications.  
29  
30  
31  
32  
33  
34  
35  
36  
37  
38  
39  
40  
41  
42  
43  
44  
45  
46  
47  
48  
49  
50  
51  
52  
53  
54  
55  
56  
57  
58  
59  
60

1  
2  
3 **Data Sharing Statement:** There is no additional available.  
4  
5  
6

7  
8 **Copyright:** The Corresponding Author has the right to grant on behalf of all authors and does  
9 grant on behalf of all authors, a worldwide license to the Publishers and its licensees in  
10 perpetuity, in all forms, formats and media (whether known now or created in the future), to i)  
11 publish, reproduce, distribute, display and store the Contribution, ii) translate the Contribution  
12 into other languages, create adaptations, reprints, include within collections and create  
13 summaries, extracts and/or, abstracts of the Contribution, iii) create any other derivative work(s)  
14 based on the Contribution, iv) to exploit all subsidiary rights in the Contribution, v) the inclusion  
15 of electronic links from the Contribution to third party material where-ever it may be located;  
16 and, vi) license any third party to do any or all of the above.  
17  
18  
19  
20  
21  
22  
23  
24  
25  
26  
27  
28

29 **Contributors:** Concept and design: AE, JL, KU; Interpretation of data: AE, JL, KU; Drafting  
30 article: AE, KU; Revision of article for important intellectual content: AE, JL, KU  
31  
32  
33  
34  
35

36 **Funding:**

37  
38 This project was funded under Contract No. HHS 290 2007-10055-I, entitled "Evidence-based  
39 Protocol for Reviewing ClinicalTrials.gov Results Database," from the Agency for Healthcare  
40 Research and Quality, U.S. Department of Health and Human Services. The authors of this  
41 report are responsible for its content. Statements in the report should not be construed as  
42 endorsement by the Agency for Healthcare Research and Quality or the U.S. Department of  
43 Health and Human Services.  
44  
45  
46  
47  
48  
49  
50

51  
52  
53 **Competing interests:** All authors have completed the ICMJE uniform disclosure form at  
54 [www.icmje.org/coi\\_disclosure.pdf](http://www.icmje.org/coi_disclosure.pdf) and declare that there are no conflicts of interest.  
55  
56  
57  
58  
59  
60

## Tables

Table 1. Cases with number of deaths in ClinicalTrials.gov record that are discordant with the corresponding publication

Table 2. Cases without any information on death numbers in ClinicalTrials.gov record but reports of number of deaths in the corresponding publication

## Figures

Figure 1. Reporting of number of deaths by data module in 123 ClinicalTrials.gov records

Figure 2. Consistency of death in matched pairs in (A) those with number of deaths in ClinicalTrials.gov and (B) those without any information on death numbers in ClinicalTrials.gov

## Appendices

Appendix Figure 1. Study Flow

Appendix 2. Examples of number of deaths reported in modules of ClinicalTrials.gov records

Appendix 3. Example of a ClinicalTrials.gov record with an indeterminate total number of deaths

Legend: In Module A, the participant flow shows 2 deaths per arm indicating a total of 4 deaths as a reason for non-completion of the trial. In Module B, results are reported for a secondary outcome entitled "Number of Participants With Overall Survival Events". The Measure Description suggests a survival analysis while the Measure Title and units show actual numbers. Since 188 of 745 participants in the TAC arm and 241 of 746 participants in the FAC arm were counted as alive in the survival analysis, 1062 individuals among 1491 participants were censored (557 vs. 505 per arm respectively). The data module for adverse events (not shown) did not provide additional information on death. Since this is a study of metastatic breast cancer, we assumed that the total number of deaths was greater than 4 as shown in the participant flow, but the actual number could not be determined with certainty.

## Reference List

- 1  
2  
3  
4  
5  
6  
7  
8  
9  
10  
11  
12  
13  
14  
15  
16  
17  
18  
19  
20  
21  
22  
23  
24  
25  
26  
27  
28  
29  
30  
31  
32  
33  
34  
35  
36  
37  
38  
39  
40  
41  
42  
43  
44  
45  
46  
47  
48  
49  
50  
51  
52  
53  
54  
55  
56  
57  
58  
59  
60
- (1) Chou R, Helfand M. Challenges in systematic reviews that assess treatment harms. *Ann Intern Med* 2005; 142(12 Pt 2):1090-1099.
- (2) Ioannidis JP, Lau J. Completeness of safety reporting in randomized trials: an evaluation of 7 medical areas. *JAMA* 2001; 285(4):437-443.
- (3) Food and Drug Administration. Code of Federal Regulations Title 21. 21 CFR 312.33(b)(3) - Annual Reports. 2012.  
Ref Type: Bill/Resolution
- (4) Investigational new drug safety reporting requirements for human drug and biological products and safety reporting requirements for bioavailability and bioequivalence studies in humans. Final rule. *Fed Regist* 2010; 75(188):59935-59963.
- (5) Sherman RB, Woodcock J, Norden J, Grandinetti C, Temple RJ. New FDA regulation to improve safety reporting in clinical trials. *N Engl J Med* 2011; 365(1):3-5.
- (6) Food and Drug Administration. Code of Federal Regulations Title 21. 21 CFR 312.32(c)(1)(i)(C)-IND safety reporting. 2012.  
Ref Type: Bill/Resolution
- (7) Zarin DA, Tse T, Williams RJ, Califf RM, Ide NC. The ClinicalTrials.gov results database-update and key issues. *N Engl J Med* 2011; 364(9):852-860.
- (8) Food and Drug Administration Amendments Act. U.S. Public Law 110-85. 2012.  
Ref Type: Bill/Resolution
- (9) Tse T, Williams RJ, Zarin DA. Reporting "basic results" in ClinicalTrials.gov. *Chest* 2009; 136(1):295-303.
- (10) Food and Drug Administration Amendments Act. U.S. Public Law 110-95. 2007.  
Ref Type: Bill/Resolution
- (11) ClinicalTrials.gov. ClinicalTrials.gov "Basic Results" Data Element Definitions. [http://prsinfo.clinicaltrials.gov/results\\_definitions.html#AdverseEvents](http://prsinfo.clinicaltrials.gov/results_definitions.html#AdverseEvents) . 2012. 6-26-2012.  
Ref Type: Online Source
- (12) Cato A. Premarketing adverse drug experiences: data management procedures. Unexpected death occurring early in clinical trials. *Drug Inf J* 1987; 21(1):3-7.
- (13) Schulz KF, Altman DG, Moher D. CONSORT 2010 statement: updated guidelines for reporting parallel group randomized trials. *Ann Intern Med* 2010; 152(11):726-732.
- (14) Ioannidis JP, Evans SJ, Gotzsche PC, O'Neill RT, Altman DG, Schulz K et al. Better reporting of harms in randomized trials: an extension of the CONSORT statement. *Ann Intern Med* 2004; 141(10):781-788.
- (15) Mansi BA, Clark J, David FS, Gesell TM, Glasser S, Gonzalez J et al. Ten recommendations for closing the credibility gap in reporting industry-sponsored clinical

1  
2  
3 research: a joint journal and pharmaceutical industry perspective. *Mayo Clin Proc* 2012;  
4 87(5):424-429.  
5

- 6  
7 (16) Prayle AP, Hurley MN, Smyth AR. Compliance with mandatory reporting of clinical trial  
8 results on ClinicalTrials.gov: cross sectional study. *BMJ* 2012; 344:d7373.  
9  
10 (17) Ross JS, Tse T, Zarin DA, Xu H, Zhou L, Krumholz HM. Publication of NIH funded trials  
11 registered in ClinicalTrials.gov: cross sectional analysis. *BMJ* 2012; 344:d7292.  
12  
13 (18) Drazen JM. COX-2 inhibitors--a lesson in unexpected problems. *N Engl J Med* 2005;  
14 352(11):1131-1132.  
15  
16 (19) Nissen SE, Wolski K. Rosiglitazone revisited: an updated meta-analysis of risk for  
17 myocardial infarction and cardiovascular mortality. *Arch Intern Med* 2010; 170(14):1191-  
18 1201.  
19  
20  
21  
22  
23  
24  
25  
26  
27  
28  
29  
30  
31  
32  
33  
34  
35  
36  
37  
38  
39  
40  
41  
42  
43  
44  
45  
46  
47  
48  
49  
50  
51  
52  
53  
54  
55  
56  
57  
58  
59  
60

1  
2  
3  
4  
5  
6  
7  
8  
9  
10  
11  
12  
13  
14  
15  
16  
17  
18  
19  
20  
21  
22  
23  
24  
25  
26  
27  
28  
29  
30  
31  
32  
33  
34  
35  
36  
37  
38  
39  
40  
41  
42  
43  
44  
45  
46  
47  
48  
49  
50  
51  
52  
53  
54  
55  
56  
57  
58  
59  
60

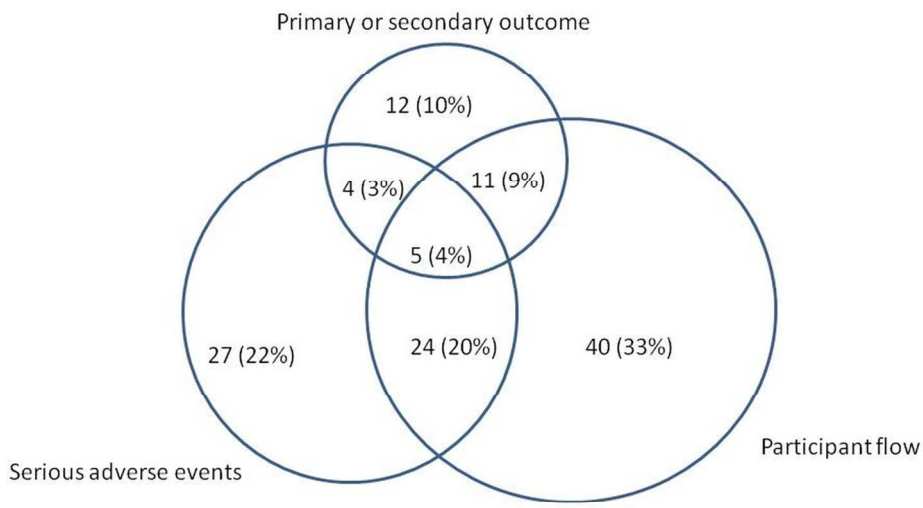

Figure 1. Reporting of death counts by data module in 123 ClinicalTrials.gov records  
119x90mm (300 x 300 DPI)

Review only

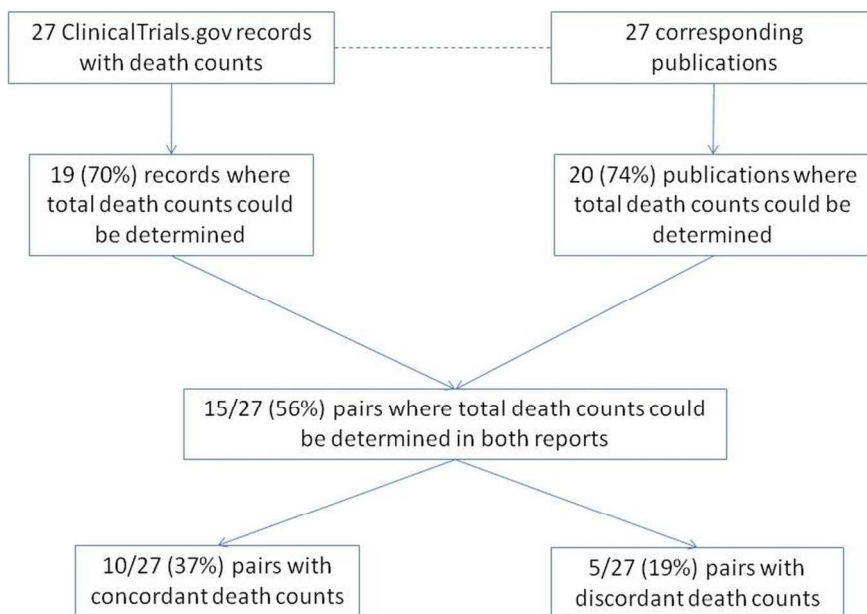

Figure 2. Consistency of death in matched pairs in (A) those with death counts in ClinicalTrials.gov and (B) those without information on death in ClinicalTrials.gov  
 119x90mm (300 x 300 DPI)

ew only

1  
2  
3  
4  
5  
6  
7  
8  
9  
10  
11  
12  
13  
14  
15  
16  
17  
18  
19  
20  
21  
22  
23  
24  
25  
26  
27  
28  
29  
30  
31  
32  
33  
34  
35  
36  
37  
38  
39  
40  
41  
42  
43  
44  
45  
46  
47  
48  
49  
50  
51  
52  
53  
54  
55  
56  
57  
58  
59  
60

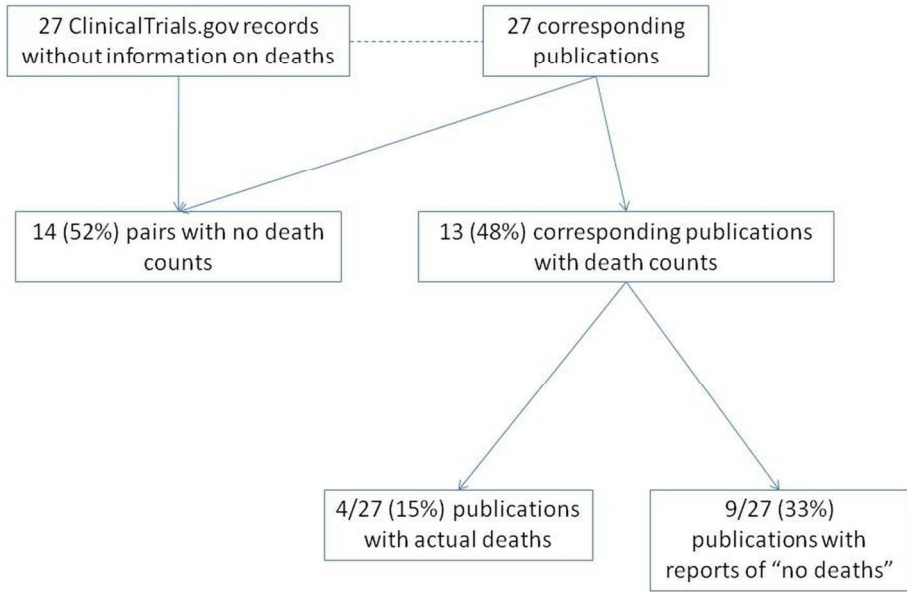

119x90mm (300 x 300 DPI)

Review only



1  
2  
3  
4  
5  
6  
7  
8  
9  
10  
11  
12  
13  
14  
15  
16  
17  
18  
19  
20  
21  
22  
23  
24  
25  
26  
27  
28  
29  
30  
31  
32  
33  
34  
35  
36  
37  
38  
39  
40  
41  
42  
43  
44  
45  
46  
47  
48  
49  
50  
51  
52  
53  
54  
55  
56  
57  
58  
59  
60

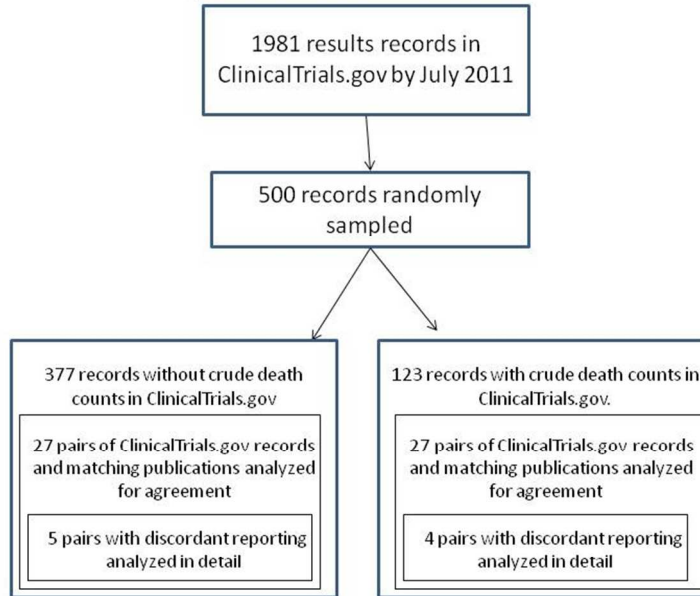

254x190mm (96 x 96 DPI)

ew only

## Appendix 2. Examples death counts reported in modules in ClinicalTrials.gov records

### Primary of secondary outcome

#### Measured Values

|                                                                                               | Evaluable Patients |
|-----------------------------------------------------------------------------------------------|--------------------|
| <b>Number of Participants Analyzed</b><br>[units: participants]                               | 15                 |
| <b>Number of Participants (Patients) Who Died Due to Transplant.</b><br>[units: Participants] | 4                  |

No statistical analysis provided for Number of Participants (Patients) Who Died Due to Transplant

### Serious Adverse Events

#### Serious Adverse Events

|                                               | Home Monitoring  | Conventional    |
|-----------------------------------------------|------------------|-----------------|
| <b>Total, serious adverse events</b>          |                  |                 |
| <b># participants affected / at risk</b>      | 124/977 (12.69%) | 74/473 (15.64%) |
| <b>Cardiac disorders</b>                      |                  |                 |
| <b>Cardiac related hospitalizations †</b>     |                  |                 |
| <b># participants affected / at risk</b>      | 45/977 (4.61%)   | 31/473 (6.55%)  |
| <b># events</b>                               | 64               | 35              |
| <b>General disorders</b>                      |                  |                 |
| <b>Death †</b>                                |                  |                 |
| <b># participants affected / at risk</b>      | 52/977 (5.32%)   | 26/473 (5.50%)  |
| <b># events</b>                               | 52               | 26              |
| <b>Non-cardiac related hospitalizations †</b> |                  |                 |
| <b># participants affected / at risk</b>      | 16/977 (1.64%)   | 3/473 (0.63%)   |
| <b># events</b>                               | 20               | 4               |

## Participant Flow

## Participant Flow: Overall Study

|                                  | Docetaxel + Sunitinib | Docetaxel  |
|----------------------------------|-----------------------|------------|
| <b>STARTED</b>                   | <b>296</b>            | <b>297</b> |
| <b>Treated</b>                   | <b>295</b>            | <b>293</b> |
| <b>COMPLETED</b>                 | <b>0</b>              | <b>0</b>   |
| <b>NOT COMPLETED</b>             | <b>296</b>            | <b>297</b> |
| Study Ongoing                    | 19                    | 31         |
| Protocol Violation               | 1                     | 1          |
| Lost to Follow-up                | 2                     | 5          |
| Death                            | 10                    | 4          |
| Objective Progression or Relapse | 227                   | 206        |
| Participant refused              | 3                     | 7          |
| Unspecified                      | 34                    | 43         |

review only

## Appendix 3. Example of a ClinicalTrials.gov record with an indeterminate total number of deaths

### Module A

#### Recruitment Details

Key information relevant to the recruitment process for the overall study, such as dates of the recruitment period and locations

Between June 1997 and June 1999, 1491 women from 20 countries were enrolled in the study. The last patient last visit occurred in January 2010.

#### Pre-Assignment Details

Significant events and approaches for the overall study following participant enrollment, but prior to group assignment

Eleven women (1 who had been randomly assigned to receive TAC and 10 assigned to receive FAC) did not receive any treatment for the following reasons: 8 withdrew consent, 1 was lost to follow-up, and 2 did not receive treatment for other reasons. In total 1480 patients (744 in the TAC group and 736 in the FAC group) were treated.

#### Reporting Groups

|                      | Description                                                         |
|----------------------|---------------------------------------------------------------------|
| TAC (Docetaxel)      | docetaxel in combination with doxorubicin and cyclophosphamide      |
| FAC (5-fluorouracil) | 5-fluorouracil in combination with doxorubicin and cyclophosphamide |

#### Participant Flow: Overall Study

|                                 | TAC (Docetaxel) | FAC (5-fluorouracil) |
|---------------------------------|-----------------|----------------------|
| STARTED                         | 745             | 746                  |
| COMPLETED                       | 679             | 711                  |
| NOT COMPLETED                   | 66              | 35                   |
| Adverse Event                   | 45              | 8                    |
| Death                           | 2               | 2                    |
| Lost to Follow-up               | 0               | 1                    |
| Consent Withdrawn               | 17              | 17                   |
| Breast Cancer Relapse           | 1               | 4                    |
| Violation of Inclusion Criteria | 1               | 3                    |

### Module B

2. Secondary: Number of Participants With Overall Survival Events [ Time Frame: up to 10 year follow-up ]

 Hide Outcome Measure 2

|                     |                                                                                              |
|---------------------|----------------------------------------------------------------------------------------------|
| Measure Type        | Secondary                                                                                    |
| Measure Title       | Number of Participants With Overall Survival Events                                          |
| Measure Description | Overall Survival - time from the date of randomization up to the date of death of any cause. |
| Time Frame          | up to 10 year follow-up                                                                      |
| Safety Issue        | No                                                                                           |

#### Population Description

Explanation of how the number of participants for analysis was determined. Includes whether analysis was per protocol, intention to treat, or another method. Also provides relevant details such as imputation technique, as appropriate.

No text entered.

#### Reporting Groups

|                      | Description                                                         |
|----------------------|---------------------------------------------------------------------|
| TAC (Docetaxel)      | docetaxel in combination with doxorubicin and cyclophosphamide      |
| FAC (5-fluorouracil) | 5-fluorouracil in combination with doxorubicin and cyclophosphamide |

#### Measured Values

|                                                                              | TAC (Docetaxel) | FAC (5-fluorouracil) |
|------------------------------------------------------------------------------|-----------------|----------------------|
| Number of Participants Analyzed<br>[units: participants]                     | 745             | 746                  |
| Number of Participants With Overall Survival Events<br>[units: Participants] | 188             | 241                  |
